# Supplementary material for: Untargeted metabolomics and phenotype data indicate the therapeutic and prophylactic potential of Lysimachia candida Lindl. towards high-fat high-fructose-induced metabolic syndrome in rats
Source: Royal Society of Chemistry journal article supplement (doi:10.1039/d3mo00104k), 2023-07-21
Supplement: d3mo00104k1.xlsx [file d3mo00104k1.xlsx]

## Sheet: Meta data
		Experimetal groups
PW3G1_1	A	Control
PW3G1_2	A	Control
PW3G1_3	A	Control
PW3G1_4	A	Control
PW3G1_5	A	Control
PW3G1_6	A	Control
PW3G2_7	E	HFHF
PW3G2_8	E	HFHF
PW3G2_9	E	HFHF
PW3G2_10	E	HFHF
PW3G2_11	E	HFHF
PW3G2_12	E	HFHF
PW3G5_25	I	Treatment
PW3G5_26	I	Treatment
PW3G5_27	I	Treatment
PW3G5_28	I	Treatment
PW3G5_29	I	Treatment
PW3G5_30	I	Treatment
PW9G1_1	B	Control
PW9G1_2	B	Control
PW9G1_3	B	Control
PW9G1_4	B	Control
PW9G1_5	B	Control
PW9G1_6	B	Control
PW9G2_8	F	HFHF
PW9G2_9	F	HFHF
PW9G2_10	F	HFHF
PW9G2_11	F	HFHF
PW9G2_12	F	HFHF
PW9G5_25	J	Treatment
PW9G5_26	J	Treatment
PW9G5_27	J	Treatment
PW9G5_28	J	Treatment
PW9G5_29	J	Treatment
PW9G5_30	J	Treatment
PW17G1_1	C	Control
PW17G1_2	C	Control
PW17G1_3	C	Control
PW17G1_4	C	Control
PW17G1_5	C	Control
PW17G1_6	C	Control
PW17G2_7	G	HFHF
PW17G2_8	G	HFHF
PW17G2_9	G	HFHF
PW17G2_10	G	HFHF
PW17G2_11	G	HFHF
PW17G2_12	G	HFHF
PW17G5_25	K	Treatment
PW17G5_26	K	Treatment
PW17G5_27	K	Treatment
PW17G5_28	K	Treatment
PW17G5_29	K	Treatment
PW17G5_30	K	Treatment
PW20G1_1	D	Control
PW20G1_2	D	Control
PW20G1_3	D	Control
PW20G1_4	D	Control
PW20G1_5	D	Control
PW20G1_6	D	Control
PW20G2_7	H	HFHF
PW20G2_8	H	HFHF
PW20G2_9	H	HFHF
PW20G2_10	H	HFHF
PW20G2_11	H	HFHF
PW20G5_25	L	Treatment
PW20G5_26	L	Treatment
PW20G5_27	L	Treatment
PW20G5_28	L	Treatment
PW20G5_29	L	Treatment
PW20G5_30	L	Treatment

## Sheet: Raw data
	Accepted Description	PW3G1_1	PW3G1_2	PW3G1_3	PW3G1_4	PW3G1_5	PW3G1_6	PW3G2_7	PW3G2_8	PW3G2_9	PW3G2_10	PW3G2_11	PW3G2_12	PW3G5_25	PW3G5_26	PW3G5_27	PW3G5_28	PW3G5_29	PW3G5_30	PW9G1_1	PW9G1_2	PW9G1_3	PW9G1_4	PW9G1_5	PW9G1_6	PW9G2_8	PW9G2_9	PW9G2_10	PW9G2_11	PW9G2_12	PW9G5_25	PW9G5_26	PW9G5_27	PW9G5_28	PW9G5_29	PW9G5_30	PW17G1_1	PW17G1_2	PW17G1_3	PW17G1_4	PW17G1_5	PW17G1_6	PW17G2_7	PW17G2_8	PW17G2_9	PW17G2_10	PW17G2_11	PW17G2_12	PW17G5_25
		A	A	A	A	A	A	E	E	E	E	E	E	I	I	I	I	I	I	B	B	B	B	B	B	F	F	F	F	F	J	J	J	J	J	J	C	C	C	C	C	C	G	G	G	G	G	G	K
X1	2'-Deoxycytidine	411792	451038	490433	560550	463972	494123	396257	448124	443552	467567	507430	474625	419691	463854	461252	432203	454113	432575	514301	588657	534625	596975	536624	534641	421409	487454	518838	499880	470635	391949	409650	530729	552632	465904	473881	275735	333208	298158	280506	284068	283139	471694	303535	280735	301520	302911	296079	323369
X2	2'-O-Methylcytidine	2501.87	1379.1	1786.09	2150.51	1641.74	1592.46	1551.94	2192.09	2161.5	2112.25	2395.72	2464.72	1410.24	1459.32	1500.96	1379.09	1547.78	1422.68	1156.95	1387.12	1285.33	1649.5	1094.37	1165.12	936.558	1018.7	1058.38	1439.26	1437.85	942.96	1024.44	1371.27	1538.28	845.417	870.884	952.508	2446.1	3032.15	2661.6	2808.04	2619.69	1832.03	1226.19	1289.19	1375.93	1430.3	1453.08	1382.72
X3	2-QUINOLINECARBOXYLIC ACID	1432.86	2264.17	3914.81	3628.21	4222.02	4177.35	3533.13	2867.96	690.326	3043.17	3397.15	2956.91	1136.51	1227.57	1239.09	1177.73	1208.02	1189.2	1694.12	1930.41	630.536	758.295	851.925	835.785	350.453	282.281	308.351	714.891	650.739	650.119	620.393	1954.46	2088.17	1051.14	1029.33	1417.16	1474.88	1957.3	1764.77	1781.49	1756.47	609.371	2763.82	2980.36	1375.29	1070.21	1126.89	517.179
X4	lithochol-11-enic acid	21851.6	8032.42	19279.7	6808.39	7817.49	5304.72	1149.3	26.4708	0	190.569	65.6238	135.615	1286.87	194.916	240.47	310.463	236.159	208.37	22180.7	9113.59	9614.06	9702.64	9240.11	13165.8	649.884	1529.55	1109.39	400.08	336.379	948.929	25.2103	1461.15	2008.98	672.842	271.655	2542.2	5037.67	13658.4	3691.89	4656.85	4325.03	2148.89	47.2078	898.37	4851.61	3978.23	4059.36	913.168
X5	3-(4-HYDROXYPHENYL)PYRUVATE	8609.77	8103.28	7086.23	7502.33	7924.51	7248.94	8156.09	7189.64	7066.64	7219.72	7373.53	6548.9	6425.91	6165.66	6081.91	6311.85	6290.56	6003.93	6273.65	6046.21	6232.18	5900.08	5849.55	5911.39	5974.91	6105.36	6339.44	6132.6	6029.9	6579.22	6579.13	6069.18	6281.41	6768.06	6663.45	6383.16	6883.96	6451.92	6923.65	7492.41	7573.75	8052.53	8426.6	8634.31	8567.44	6346.12	6869.41	6526.16
X6	3,4-Dihydrocoumarin	17340.3	15066.7	18218.4	17271.8	14774.9	14237.7	17390.8	15874.3	15513.6	14904	17319.4	16638.5	16607.9	17424.4	17890.3	16124.1	15344.9	14883.7	21732.5	22118.5	26135.1	29017.7	23464.7	22364.6	16644.4	17235.8	19027.4	19626.4	20942.4	17227.1	16336.9	17760.7	19045.3	17477.5	18128.7	16254	21003.5	21456.8	22080.1	21223.9	19392.8	22759.3	22075	22069.9	18075.3	21981.5	19814	19896.4
X7	3,4-Methylenedioxy-N-methylamphetamine (MDMA)	3681.13	3713.45	3765.84	3662.03	3634.11	3545.57	3589.58	3736.49	3698.69	3666.16	3596	3546.4	3612	3672.22	3617.33	3785.58	3677.98	3537.84	3614.97	3638.1	3636.98	3621.26	3666.94	3759.78	3675.62	3658	3818.77	3742.02	3649.9	3452.34	3398.06	3472.55	3376.04	3599.34	3411.19	3535.38	3426.78	5142.93	5170.87	5122.98	5244.02	5085.52	5402.03	5151.78	5307.09	5015.89	5287.93	5084.37
X8	3-Indolepropionic acid	58032.7	94787.1	193086	152838	239236	243771	5118.68	3898.03	3611.28	4041.28	5035.65	4069.05	3176.35	3209.24	3452.89	8895.96	9153.47	8588.5	135491	262650	53523.5	60953.1	20313.7	20700.2	2796.64	2507.96	2538.93	5961.22	5378.64	2826.48	2881.14	7491.19	8378.65	8789.88	8651.32	3736.6	15191	18471.6	17083.9	17234.9	16612.2	4505.69	8233.67	8451.56	8510.03	7765.94	7388.47	1850.52
X9	3-UREIDOPROPIONATE	1926.65	2543.7	4575.38	1464.44	2286.03	2018.43	3835.18	2110.93	2643.93	2173.47	2413.76	2526.22	2407.36	2326.31	2500.17	1779.67	1710.58	1465.06	2269.07	2908.27	4896.08	5428.09	2644.61	2246.26	4276.57	4303.09	4160.93	4302.74	4189.77	3242.34	3394.46	3605.63	3771.69	2504.85	2432.2	1632.75	2406.94	2590.57	2311.87	2264.39	2098.08	3381.82	3083.07	3017.95	3019.42	2850.21	2770.5	2777.08
X10	phenylalanylvalin	465.622	686.572	180.887	341.859	567.859	574.378	202.694	722.062	363.951	584.927	699.627	370.034	143.018	141.572	203.291	330.636	343.033	345.682	303.017	330.724	769.43	709.054	469.131	458.262	716.756	810.954	1164.63	432.569	284.116	203.07	171.511	1101.54	913.987	301.785	299.321	1365.52	1249.93	1034.58	1117.45	834.713	792.901	569.682	238.165	520.268	532.511	1892.85	1407.85	915.662
X11	4-Coumaric acid	143791	134342	161844	190633	136407	136573	201119	153797	149382	153079	170155	158053	149829	155923	156263	170725	173492	164837	205903	194007	202186	231172	182869	176494	148968	168830	173355	202623	190594	163256	164606	187336	197933	166283	160434	116204	166666	205678	184377	184213	190552	227113	171591	161913	162365	158505	176150	145748
X12	4-guanidinobutanoic acid	6127.47	12982.5	29054.8	15099.1	17422.6	17977.7	1486.95	2256.84	280.587	2243	2615	2572.9	1100.82	1229.3	1272.67	1253.31	1437.64	1295.26	11991.9	20068.1	8497.02	8161.77	5281.49	4561.45	1775.84	1162.15	1493.53	4184.27	3317.26	1662.63	1735.6	2470.63	2445.81	3310.02	2807.06	1758.26	2032.51	2338.84	2549.78	2850.69	2357.89	2217.58	2736.78	2520.63	3783.76	3781.4	3219.11	1752.96
X13	4-Hydroxybenzaldehyde	15671.2	14982.5	17719.9	20595	15446.5	15341.6	22106.7	17067.1	16285.7	16944.1	18749.3	17928.1	16482.4	17497.4	17209.7	19058.4	19048.7	18459.4	22834.9	21317.4	22598.9	25696.6	19903.2	19416.6	16689.9	18800.5	19304.7	22683.3	21394.3	18121.5	18604.1	20379.2	21565.7	18126.5	17443	12938	17841.8	22245.4	19816.3	19617	20465.3	24193	18534.3	17375	17551.4	17036.2	18857.9	14970.2
X14	4-HYDROXY-L-PROLINE	8617.34	10788.5	15498.8	17162	8963.43	9675.04	10151.3	9111.43	12892.8	9732.53	9199.75	10048.1	11342.4	11271.8	10991.9	8524.09	9420.85	8288.93	10441.2	11395.9	10348.6	13428.5	6849.33	7736.6	7449.01	7734.83	8054.66	6325.45	8112.55	7597.33	7252.95	8084.42	9708.89	5796.54	6242.8	4690.87	6385.75	7203.95	5209.87	6844.24	6604.97	2928.32	3146.41	2956.68	4487.77	4826.03	4697.8	6319.27
X15	4-IMIDAZOLEACETIC ACID	1901.15	1653.97	2880.36	1800.2	2128.41	2260.15	1446.47	1353.91	1339.12	1429.89	1435.1	1437.52	1278.41	1280.69	1420.49	1183.1	1090.53	1027.81	996.348	1131.97	1059.95	1331.12	1371.28	1282.4	1368.3	1471.71	1430.53	1434.21	1357.98	1190	1329.09	1501.37	2065.71	1188.36	1205.55	912.65	1073.53	1004.46	952.794	1086.62	1084.12	863.44	1820.76	1564.42	1190.57	779.422	857.593	1053.29
X16	5-Hydroxyindole-3-acetic acid	20904.4	42216.4	46996.3	37082.1	15940.1	15829.7	67832.5	56868.8	18090.3	58043.3	69558.9	68669	52254.6	52124.8	52390.4	57311.2	59001.5	56932.9	42353.9	59456.9	39297.1	46471.3	24062.3	24416.5	27219.1	27054.5	26436.7	23886.4	22415.7	49612.2	53879.1	45117.4	47546.3	36633.5	35820.3	23725.3	57713.1	74299.9	67346.8	67308.8	66296.9	57847	42770.5	37535	33221	33046.6	34762.8	45535.9
X17	5-Methylcytidine	22112.1	30799.5	36150.3	36046.7	29701.9	30082	34764.9	29667.8	32307.9	29863	36556.7	34041.5	34270.3	38377.9	37611.6	32206.8	33530.8	32878.6	38950	41174.7	44779.5	50047.6	39630.9	38690.8	36110.8	39583	44747.3	42982.1	37903.9	34664.8	35318.7	42242.1	46778.5	33937.2	34124.6	23008	27341	35655.9	31107	32030.7	33359.3	50165.8	44101.3	41554.2	41222.1	39551.2	47256	40139.5
X18	5-Methylcytosine	3215.36	3200.07	6323.68	6016.42	4938.32	4974.21	2611.15	2330.14	3726.41	2308.64	2709.48	2433.76	2425.84	2620.75	2581.34	2415.78	2479.55	2313.26	4758.92	6231.59	5941.55	7037.73	6841.31	6823.07	2070.83	2406.82	2655.2	2827.74	2492.38	2060.56	2101.3	4953.26	5314.35	2429.29	2323.46	2338.96	2908.23	4414.64	4134.38	4183.56	4163.83	6314.13	4022.43	3351.83	3016.13	3073.11	3167.61	2314.62
X19	5-Methyltetrahydrofolic acid	3016.45	3177.4	3462.63	2852.23	2866.04	3116.17	3480.44	3696.57	1779.47	3881.38	4296.57	3268.26	2785	3170.04	3043.26	2043.41	2322.27	2453.99	3050.82	2800.39	4488.43	4572.2	3425.62	3514.32	3215.37	3350.99	3948.15	3897.93	3366.88	2352.19	3099.19	4253.37	4341.66	2493.81	2309.13	1055.19	3107.78	4066.93	3477.11	3459.81	3163.3	2941.32	2804.41	2798.39	2400.57	2892.88	2836.98	3820.15
X20	5'-S-Methylthioadenosine	1152.67	767.238	1071.59	2433.36	2147.28	1705.9	2358.77	1353.84	911.06	1695.18	1431.27	1221.25	1524.83	1616.34	2098.95	2750.3	3083.59	2487.67	2269.86	2362.92	2677.36	2964.85	2383.65	2195.05	2062.53	2097.38	2704.68	1279.13	1314.75	1247.65	1451.52	1883.97	2269.74	1864.73	1685.95	559.077	621.938	1395.1	999.119	1042.03	1399.61	1071.36	1144.81	1253.19	1072.94	817.508	1031.17	826.345
X21	6-Ketoprostaglandin F1alpha	98340.2	37237.3	105198	84090.8	25795	25419.7	20095.3	59122.2	69487.9	61125.4	56282.9	89479.8	42247.2	43824.9	44877	50016.2	47231.8	50164.9	74861.8	55398.6	92894.5	62073.2	64455.5	51720.9	33006.7	34099.9	44584.8	79171.5	74921.9	28578.1	25862	103691	94131.5	50380.3	35951.8	24170.7	36492.2	30027.2	32177.5	33540.2	34881.6	48644.9	65454.1	70759.6	35337.3	47335.3	71725.5	43267
X22	7-Methylguanine	2957.49	2216.47	3171.82	2979	2397.49	2355.01	2558.32	2284.58	2269.14	2344.5	2692.89	2579.01	2131.56	2187.9	2269.56	2035.21	2103.41	2087.4	2030.81	2649.62	1925.16	2485.17	1869.91	1688.09	1545.26	1680.85	1810.91	1717.77	1674.56	1606.71	1736.97	1949.46	2180.24	1706.39	1635.36	966.933	1930.68	2587.08	2274	2328.4	2348.16	1583.19	1543.85	1464.31	1695.94	1644.47	1849.78	1534.88
X23	15-Acetoxyeremantholide B	3454.51	2808.82	2624.02	2707.35	2943.83	2784.18	2543.33	2347.48	2754.03	2618.16	3059.75	2880.87	2996.39	2701.11	2496.6	2655.69	2737.76	2943.18	3081.47	2463.59	2715.59	2859.97	2535.06	2532.28	3027.66	3059.25	3169.55	2611.82	2997.95	2710.66	2274.13	3069.87	3270.53	2797.84	3222.36	3095.23	2789.81	2138.15	2007.98	2144.58	2155.33	2454.37	2399.01	2170.83	2049.94	2315.26	2312.52	2525.99
X24	16(R)-HETE	4.81817e+06	2.01202e+06	2.98325e+06	3.12442e+06	1.00397e+06	975421	1.06215e+06	1.44922e+06	2.506e+06	1.61344e+06	1.71847e+06	2.93302e+06	1.7698e+06	1.62201e+06	1.56855e+06	2.15194e+06	2.10576e+06	1.95162e+06	987875	916005	1.32566e+06	1.13933e+06	1.48575e+06	1.2259e+06	948473	982660	1.27695e+06	1.1182e+06	1.2966e+06	501875	678751	1.51195e+06	1.71098e+06	831830	794456	2.17155e+06	2.70013e+06	1.90742e+06	2.08066e+06	2.05749e+06	2.39008e+06	2.07954e+06	2.86541e+06	3.63946e+06	1.89684e+06	1.55732e+06	2.27432e+06	1.56257e+06
X25	18:0 Lyso PC	74941.8	148437	172880	134716	381563	388452	195113	124851	57718.8	139988	138928	128887	128974	122318	125562	123493	126802	128192	163510	242491	53911.4	60539.2	72089	69157.4	62108.3	50109.5	51309.7	193114	193781	147539	140862	45524	42912.8	197261	214517	56925.1	39629.2	46718.2	47680	40883.7	37195.6	131453	104125	103291	91736.8	85799.9	78359.4	80527.6
X26	Acetylarginine	5301.71	1267.98	1567.54	1558.36	1458.36	1454.28	1468.36	4362.36	688.055	4937.27	4905.22	4642.5	1168.44	1397.83	1448.38	1225.47	1322.27	1301.02	1556.68	1608.82	1333.13	1457.09	1178.58	1154.78	832.431	705.58	1245.82	1334.06	1118.44	835.793	935.738	3028.33	3233.32	1178.21	905.421	681.294	3744.14	4357.85	4210.15	4189.41	4118.86	699.192	737.156	675.318	824.259	752.526	766.818	810.494
X27	ADENOSINE	819.734	851.762	466.133	683.608	1101.37	545.093	822.651	606.748	769.162	748.142	939.732	1368.47	653.566	653.42	672.224	1057.14	1737.82	1287.91	902.256	18278.8	1171.17	18033.2	1416.97	1628.27	3763.47	6228.97	3190.57	1227.07	1827.16	1380.03	2128.53	3471.11	2444.53	1643.52	1362.51	241.231	337.36	412.505	458.388	295.563	453.071	654.833	391.73	449.382	268.363	596.129	567.924	361.073
X28	Adenosine 5'-monophosphate	647.513	680.38	416.174	535.969	74.288	159.263	44.1795	89.6863	120.001	225.81	136.457	590.14	294.985	67.9365	130.089	359.64	93.278	266.845	30.9278	2896.84	265.651	4889.31	195.682	301.148	446.879	323.674	211.367	0	55.3044	0	37.4201	219.647	230.532	50.5336	45.2828	0	42.7078	30.1558	171.475	0	20.2399	0	0	44.203	40.3904	36.6806	98.0937	0
X29	Aniline	377.158	729.421	811.362	690.822	327.415	332.45	1202.93	1041.49	324.412	1043.59	1166.03	1176.43	915.576	883.56	941.6	997.091	1030.41	990.471	694.706	1007.79	650.07	779.605	420.522	446.612	503.3	462.061	517.635	420.862	412.174	835.26	912.428	740.102	802.812	601.838	645.074	394.367	1008.2	1216.44	1067.51	1100.14	1102.25	955.334	691.9	614.955	555.738	567.689	595.241	810.091
X30	Anthranilic acid	711.517	230.259	634.072	154.147	150.729	148.056	113.493	542.399	141.665	597.508	590.724	592.554	101.418	138.404	87.0327	77.1867	91.2538	78.7293	369.42	230.396	626.173	745.919	716.867	698.898	274.573	323.141	318.102	385.152	364.657	170.898	141.642	993.096	1095.64	243.473	233.784	110.383	1578.38	2420.65	1997.47	2126.67	2445.18	279.172	415.021	457.611	593.843	544.412	508.755	78.5865
X31	Aspartame	9740.94	7725.7	8976.58	9517.84	8299.18	8223.66	12946.5	10820.6	8662.67	10866.7	12667	11067.4	9251.37	9247.97	9558.64	10873.1	11154.7	10776.9	14260.3	13677	16641.8	19319.7	12522.3	11804.5	8992.01	10577.8	11548.6	10563.3	9277.26	9710.6	9675.75	13371	14594.2	10303.3	10012.3	5058.16	12544.6	16881.5	15378	14735.3	14824.9	11683.7	11104.6	10339.8	9870.81	9430.05	9232.19	9368.2
X32	Benzothiazole	2360.36	2399.9	2307.23	2424.3	2273.86	2362.25	2489.88	2335.44	2260.5	2323.47	2334.87	2403.07	2407.5	2416	2336.3	2385.19	2338.18	2219.2	2615.02	2439.86	2460.39	2381.07	2379.86	2445.42	2488.8	2545.76	2422.2	2506.74	2410.82	2606.42	2543.64	2466.38	2418.84	2422.86	2425.51	2579.36	2456.22	2291.38	2253.58	2209.67	2239.05	2118.39	2189.34	2223.76	2280.57	2221.6	2196.81	1984.56
X33	C18_Sphingosine	35323.1	17227.1	26314.2	21568.6	13023.7	15278.1	9018.26	27082.3	24102.3	15847.7	24551.9	20581.2	8850.24	8167.58	6745.21	9234.13	6869.78	12610.9	14235.9	2669.28	6168.95	3098.69	6248.17	4765.71	3075	2806.14	3956.56	4531.2	4086.26	3726.11	2677.4	5729.78	5399.5	5381.87	4902.66	24227.4	24664.4	15697.9	19355.7	30427.3	9134.19	26268.1	17475.2	20574.7	27369.3	27213.8	30237.5	15916.9
X34	Caffeic acid	8574.71	8590.53	8405.83	8814.74	8330.05	8441.68	8318.15	8217.86	8335.51	8407.61	8047.31	8094.85	8389.15	8635.24	7998.92	8202.76	8107.07	8001.58	9255.1	9195.49	9043.05	8854.44	8930.29	8802.54	9455.1	9237.22	9069.24	8717.61	8755.04	9439.34	8703.74	9075.24	9194.78	9205.75	9046.46	9776.22	9857.31	10992.8	11110.7	10688.3	10759.1	11084.5	10631	10905.1	10888.1	10429.4	10644.2	10227.8
X35	CREATINE	853989	406514	393827	369080	307756	333284	137828	203408	215958	180215	177728	201237	166731	176555	193761	222900	216042	192647	1.01035e+06	617238	961202	1.21836e+06	808967	763634	675689	817794	915829	168253	158202	187118	174541	470909	536551	200866	179026	282905	1.03534e+06	1.13435e+06	965775	1.00126e+06	1.04083e+06	350563	422427	413529	415399	425072	449270	490666
X36	D-(-)-Quinic acid	2345.74	4593.42	5009.75	3881.5	1685.13	1686.81	7387.92	6115.3	1895.23	6196.73	7599.57	7509.81	5499.63	5659.48	5655.56	6173.38	6439.75	6121.14	4657.38	6692.08	4257.02	5005.68	2514.26	2663.55	2960.83	2848.92	2811.16	2612.76	2282.74	5480.63	5929.31	4997	5073.69	3791.42	3826.71	2571.26	6193.85	8230.76	7367.69	7438.1	7308.12	6266.08	4717.71	3965.9	3648.77	3484.81	3789.57	5010.12
X37	Dihydrosphingosine	10682.1	2861.63	6430.38	4468.85	2316.21	2466.94	2782.89	3254.69	4424.83	2308.55	3724.48	3802.46	2430.23	1313.07	1393.38	1656.54	1153.29	2093.29	4115.19	773.229	1657.15	854.705	1211.43	1041.73	743.482	651.503	872.148	923.034	1018.51	1251.28	563.846	1903.8	2289.32	1294.61	1303.71	7892.78	7967.55	4961.28	6739.95	6435	2131.87	12646.2	4821.48	3726.55	3739.73	7755.22	8079.59	7734.35
X38	Diaminopimelic acid	4206.93	3239.06	5181.12	5133.78	3672.65	4189.21	1503.71	1895.4	1178.94	1603.51	2071.3	1844.19	1128.51	1160.87	1098.32	1452.14	1237.08	1231.17	4408.21	5813.12	3967.23	4411.29	3477.27	3584.01	1211.55	1524.06	1157.24	1204.79	1294.6	1384.59	1080.1	2441.81	2514.74	1302.01	1245.87	819.354	2400.74	3182.73	2463.78	2401.17	2820.61	1278.6	973.683	869.503	1175.58	976.656	1083.84	696.015
X39	Dimethyl sebacate	157.931	155.902	130.962	257.188	141.248	154.487	70.1731	41.182	120.636	47.8235	49.9416	82.6921	47.895	46.9106	46.2486	53.4389	41.4455	58.6031	186.024	126.315	288.283	290.187	282.676	218.85	140.241	127.488	165.296	97.6532	82.2209	128.222	78.2666	229.458	272.994	123.051	81.7927	128.577	263.067	354.78	302.057	256.586	296.861	242.792	193.581	231.225	264.294	251.81	268.019	119.873
X40	Diphenylamine	3571.08	3567.12	3451.81	3306.69	3168.36	3454.86	3577.29	3258.3	3386.95	3006.63	3200	3082.31	3164.72	2950.74	3518.18	3468.93	3346.53	3216.65	3622.15	3348.06	3441.9	3370.09	3255.35	3119.19	3085.42	3245.93	3094.87	3462.43	3322.12	3604.74	3494.47	3084.02	3293.85	3311.07	3479.47	4222.59	6099.14	5750.63	5732.69	5944	5248.06	7426.11	5726.56	6573.05	5617.11	5991.85	5677.81	8404.34
X41	Diphenylsulfone	2948.69	3183.01	3062.24	3653.26	3389.73	3544.17	2812.69	2398.25	2420.98	2236.54	2107.95	2247.95	2755.74	2526	2515.01	2586.18	2494.32	2328.95	3642.37	3892.05	3326.62	3106.91	3095.43	3197.12	3235.77	3378.92	3171.17	3040.64	3017.89	3105.53	2668.59	3186.74	2907.43	2882.53	2914.39	3753.37	3331.44	3371.72	3220.47	2961.71	3060.58	2808.92	2632.12	2797.57	2587.89	2701.81	2626.96	2749.48
X42	DL-alpha,epsilon-Diaminopimelic acid	3577.78	3815.95	3728.05	3885.78	3921.24	3645	4319.22	3808.16	3253.47	3830.34	3666.5	3752.61	4078.77	3912.66	4164.85	4065.13	3895.25	3959.83	5476.81	4930.73	4817.72	5055.17	5013.76	4718.01	5080.67	5371.1	5779.21	5069.22	4817.64	5363.42	4781.46	5625.1	5347.85	5459.72	5544.58	8769.57	10931.2	7553.15	7098.66	7526.94	7620.47	7200.57	7095.26	7280.13	7390.67	7432.85	7464.03	7073.59
X43	DL-alpha-Aminocaprylic acid	157.355	337.372	143.919	150.657	226.405	204.178	138.078	115.562	243.678	115.951	129.198	99.4748	127.671	119.744	124.51	111.643	113.403	106.013	316.486	186.161	119.576	130.321	143.028	123.197	86.4583	112.355	112.682	97.376	115.278	107.863	133.243	79.5425	91.7769	125.417	104.701	109.02	93.8318	144.05	120.645	117.407	105.557	231.82	166.325	153.234	182.5	121.485	138.441	139.428
X44	DL-Pipecolinic acid	17919.1	14856.7	16271.3	17420.6	12242.4	12186.2	32715	28979	22891.7	29438	33960.6	29039.8	35000.4	32844.7	32019.6	28856.9	32526.5	35356.5	24846.3	20954.5	19093.8	17131.2	16016.9	16424.5	19376.3	18185.6	17159	29887.3	26593.2	32744.1	30602.6	23824.8	23648.6	28260	29057.4	20834.8	18889.4	20809.3	22357.2	20861.2	21462.9	16712	15599	15551	18418.6	17348.5	18116.8	25569.8
X45	D-PANTOTHENIC ACID	34575.3	27997.9	32318.4	28011.4	23602.6	23963.5	23904.1	32914.4	22900.3	33173.6	33714.1	30615.7	22356.8	24036.1	24920.3	19119.2	18821	18807.9	46548.1	26765.3	39854.4	46966.1	30535.8	29142.5	19881.4	22455.2	28582.5	23705.4	20725.2	21543.6	22014.5	38878.7	41289.1	22671.5	21720.8	15436	42408.9	63685.5	57136.8	58386.6	59389.6	25989.1	28737.3	27170.6	30353.1	23572.4	24226.2	28625.2
X46	gamma-Amino-n-butyric acid	3030.62	3648.27	3846.63	4437.44	3798.29	3907.46	3666.79	3882.49	3645.31	3879.03	4481.94	3846.39	3627.85	3692.1	3832.48	2493.71	2748.59	2617.03	4492.25	5906.4	4924.4	5674.28	3480.92	3247.03	5597.97	5785.61	6227.93	3821.37	3361.34	3610.94	3657.67	5893.48	6167.38	3211.54	2864.93	4613.63	4404.06	4860.04	4215.75	4170.79	4367.25	15918.2	6492.07	4753.62	4649.58	4474.19	4325.27	5871.87
X47	gamma-Glutamylthreonine	2738.72	1500.48	1986.27	3511.79	2398.46	2614.2	3881.48	3917.05	1582.51	4251.27	4374.43	4077.61	3263.56	2955.81	3202.79	3147.62	3043.99	3136.16	3442.4	3648.68	4408.19	5037.4	3236.85	3069.96	2752.1	2774.65	2945.8	3192.74	3437.17	3175.81	3038.79	5116.98	4796.95	2519.01	2722.64	848.051	2066.78	2752.22	2200.04	2385.51	1913.15	1010.52	1106.98	771.71	859.955	923.015	712.401	1307.98
X48	gamma-Glutamyltyrosine	9620.76	8416.05	10053.2	14300.2	9871.66	10130.8	18922.1	12334	10374.5	12829.4	14801.7	12874.1	10046.8	10415.8	10678.8	14178.7	14400.1	13548.3	14344.6	13405.3	15625.7	17821.3	13153.3	12524.2	10912.2	12560.5	13358.8	12579.3	11164.6	10774.9	11003.6	15158.4	15765.7	11488.6	10671	5020.77	12103.9	17674.5	14958.9	15392.9	14400.4	12984.8	10216.3	8293.71	9068.96	9761.38	8872.75	8803.21
X49	gamma-Glutamylvaline	4498.46	4184.79	5134.38	5988.09	5936.09	6269.18	11562.1	6928.97	4445.39	7198.69	9163.69	7310.53	7402.37	8163.45	7894.08	7331.67	7803.55	7095.23	6272.35	5653.98	6722.08	8079.42	6477.03	6474.27	6460.47	6782.9	8390.91	7678.78	7678.62	7012.73	8089.72	6552.42	6653.18	7146.94	6869.68	1923.21	5472.87	6833.24	6052.71	6194.93	5856.16	3570.54	4448.43	4270.93	3903.34	3947.06	3885.98	4093.21
X50	gamma-L-Glutamyl-L-glutamic acid	3150.25	2659.84	4068	9598.42	2699.58	2800.8	4312.96	2182.57	1854.57	2016.72	2178.67	2277.64	2472.02	2110.27	2143.74	3777.1	3199.36	3302.45	2075.54	1507.95	2657.46	2215.63	2109.1	1871.28	804.495	633.319	986.018	730.304	969.311	474.693	564.61	942.246	1086.7	814.812	539.406	949.41	1241.84	1319.98	1197.59	1157	1334.92	1213.23	1817.93	1546.11	1188.69	933.046	1248.9	1355.14
X51	Gliocladic acid_130132	2584.71	2481.27	2890.94	3059.24	2727.62	2297.65	5225.92	7667.97	5154.23	7799.89	9383.79	7774.45	4776.09	4541.17	5324.51	3274.81	3144.83	3413.71	2827.97	3749.14	3381.52	3776.92	3191.38	2868.85	3868.36	3990.87	4296.35	6483.56	6313.87	4333.27	4442.4	8037.49	8373.25	3437.54	3100.73	4256.69	5961.48	5453.32	5877.77	5452.84	5282.54	5661.98	4362.72	4098.48	5003.69	5021.46	4754.31	5454.03
X52	GLYCOCHENODEOXYCHOLIC ACID	40446.5	14004	54885.1	33851.5	2453.49	1280.26	99.4796	1194.07	388.6	981.798	1335.18	886.007	114.953	136.498	336.133	292.886	310.358	368.152	42729.7	26708	61777	62787.6	76627.6	79531.6	5051.63	7701.5	7732.91	275.392	430.409	117.409	412.917	1747.68	1488.67	154.386	159.702	540.037	43850.4	53097.9	41082.2	48840.9	48612.3	563.825	6226.16	10505.4	57974.4	44192.3	44882.9	405.342
X53	Glycyl-L-leucine	503.288	253.124	341.87	683.497	187.482	214.34	439.592	205.59	262.317	160.504	294.303	379.682	256.998	242.046	242.617	653.825	618.955	855.496	434.968	586.722	633.675	844.147	673.918	637.585	493.261	511.996	815.616	450.174	518.322	310.4	391.426	508.2	679.548	441.805	463.248	439.935	374.736	289.654	309.248	299.923	198.463	308.009	443.194	429.473	195.694	357.47	596.502	424.482
X54	Glycylproline	8763.38	7930.41	9039.66	7245.07	6857.57	7086.03	15375.2	9695.49	18310.4	8881.87	9570.5	9209.02	17441.6	18545.8	18351	10422.6	10179.6	8930.39	6560.01	5190.72	5046.6	6051.45	5921.88	6044.32	5555.09	5549.44	5588.71	7804.17	7342.66	11874.7	11680.1	11514.6	13314.8	10059.3	9298.73	3043.87	8165.87	8599.86	6786.61	7642.26	7873.47	7830.49	6189.61	5443.87	6816.79	5939.7	6464.65	6431.85
X55	Guanidinoethyl sulfonate	1127.52	907.468	835.352	907.408	716.056	812.174	885.292	1460.89	1029.56	1658.98	1606.68	1851.23	1216.87	1092.76	1055.04	1630.16	1829.79	1527.92	1440.42	1647.43	1850.54	1859.79	1561.32	1489.11	1937.51	1779.26	2163.37	1862.46	1671.6	1985.82	2165.63	2638.93	3072.56	2164.11	2176.55	3016.2	691.442	760.536	655.632	684.58	617.233	3287.58	2027.11	1857.89	3716.6	4051.1	3854.79	2194.3
X56	HIPPURATE	71469	49847.4	103082	100347	92360	89974.2	3591.61	1936.24	1332.59	1947.58	2209.35	2228.76	1635.69	1652.97	1799.49	1428.42	1446.14	1437.49	34241.2	65838	5624.04	5665.76	6807.94	6173.5	2816.46	3091.62	3246.27	2799.43	2407.64	2911.79	2944.57	5259.14	5672.45	3437.22	3082.16	1153.89	8649.12	12147.8	10891.9	10813.3	10769.4	1287.6	1816.1	1675.15	1953.25	1948.9	1558.21	1402.07
X57	IAA-Val , Indole-3-acetyl-L-valine	986.747	1838.07	506.306	955.59	2103.76	1942.72	1518.9	1640.85	958.435	1661.82	1420.8	968.947	1274.84	1328.55	1508.04	1118.7	1359.06	1252.6	2244.41	2599.68	4784.29	4797.67	2946.76	2647.79	3414.4	3269.43	3856.66	2560.95	1897.6	1637.24	1262.29	4797.6	4203	1466.52	1326.27	6442.75	5491.55	6550.26	7131.8	6009.88	5284.99	11604.5	3602.35	6740.86	4755.86	10225.3	8376.29	7666.19
X58	indole	4036.96	6328.34	5291.05	4088.82	5529.54	5809.44	7432.55	5122	4081.98	5179.97	6121.93	5128.37	6011.37	6130	6548.25	7019.05	7580.19	7419.13	11771.2	12031.6	12737.2	14450.4	11958.7	10846.7	7565.72	9378.67	8859.12	10350.6	9624.1	7827.44	8530.33	9892.03	10286	9069.86	9444.27	6242.53	5878.74	7349.48	7270.49	6731.3	6315.69	10077.9	11091.1	10399.4	8768.66	8457.51	9160.76	8504.1
X59	Indole-3-acetaldehyde	80554.1	72146.9	72156.7	65954.9	67062.2	68928	48192.8	79055	54696.9	80000.3	89777.1	82684.9	37669.3	40952.8	39750.3	77584.5	82141.7	79487	79348.3	77540.6	77391	89647.6	73495.2	76621.2	66619.6	83531.6	88200.5	74687	62395.6	47513.9	47653.8	76839.7	80362.3	95567.7	89455	55270.3	62344.9	72392.6	64886.4	66829.6	62867.6	37783.2	62313.9	62758.4	74382.9	77808.6	78475.7	38562.3
X60	Indole-3-acetyl-L-aspartic acid	176.099	301.117	176.253	119.25	201.535	147.763	219.927	137.968	183.558	165.987	177.332	251.845	303.068	284.585	307.58	219.96	275.704	239.723	104.409	333.038	221.361	473.524	172.445	165.537	98.9444	58.5177	82.1334	110.91	122.815	60.8731	74.6054	88.5413	107.233	48.3318	39.2537	84.1	17.8549	33.7801	77.8342	40.7699	110.84	118.274	78.6858	70.3164	16.133	20.1415	34.6321	279.318
X61	Indole-3-carbinol	4103.87	1420.12	2768.18	2841.08	3414.9	3579.44	383.463	303.088	492.555	319.03	350.197	295.419	247.198	268.288	242.396	459.814	471.844	455.439	1714.2	2240.71	1018.92	1170.89	1401.12	1506.07	321.06	379.319	440.844	407.057	389.442	340.581	343.961	588.424	648.525	578.209	617.195	303.783	546.645	735.598	692.305	679.967	706.046	660.577	638.994	615.826	902.253	831.26	816.442	343.583
X62	Indole-3-carboxyaldehyde	14736.9	21616.6	19277.6	14804.7	20665.5	21695.1	27063.7	18626.6	14815.3	19076.8	23410.6	18963.6	22945.1	23018.5	24258.3	26598.5	27516.7	26249.4	41978.1	43583.2	46571.7	54798.2	45827.3	41726.9	29624.6	33005.6	32149.8	39668	35343.5	28656	33381.1	37432.2	37200.1	35156.7	35115.5	23203.5	22050.8	27366.6	25883.1	25709.5	23471.5	36902.3	42300	36871.8	30733.2	30585.6	30662.7	33116.7
X63	Indole-3-carboxylic acid	412.347	212.003	849.858	424.073	1367.65	1198.91	67.5875	28.754	50.3539	40.7215	49.8543	30.928	43.3763	29.2568	44.0159	58.5383	33.2804	46.9616	365.837	485.344	155.436	190.126	160.573	154.115	42.8418	61.4571	57.3429	40.9844	60.1162	53.5727	39.3536	47.396	75.0192	53.319	60.7045	72.5378	169.209	165.859	156.372	136.709	133.79	79.7868	65.164	61.1296	49.7698	53.4158	34.8607	31.2407
X64	Indole-3-lactic acid	6486.08	9574.65	11096.3	4524.13	13157.7	13260.1	2562.72	2074.1	1472.02	2090.15	2249.96	2365.58	2128.47	1989.55	1753.85	1977.28	2017.85	1969.48	4981.81	9274.44	1761.49	1968.09	2245.12	2017.21	1380.75	1480.64	1518.37	2311.17	2213.8	2263.2	2206.89	2390.88	2700.97	2297.14	2354.1	1560.41	2095.77	2912.15	2619.18	2887.14	2801.97	2799.12	3345.33	3305.15	3519.83	3439.96	3455.26	2134.62
X65	Indoleacetic acid	7249.89	10576.2	9789.67	20112.4	16006.2	15683.4	2441.15	1954.1	3687.61	1995.82	2261.39	2023.47	1522.82	1446.83	1502.31	3148.92	3557.66	3136.16	12948.9	17089.7	7287.07	8330.68	10999.9	11104.7	1998.81	2367.18	2715.96	2429.32	2286.56	2051.97	2022.57	4317.73	4559.93	4382.46	4363.74	1840.91	2765.7	3496.19	3602.79	3619.11	3558.56	4408.01	4276.49	4189.45	6646.42	5847.86	5746.91	1700.36
X66	Isatin	1662.53	899.826	1403.26	734.309	815.054	726.437	643.599	1518.48	729.274	1423.44	1661.77	1519.65	690.969	612.738	633.115	587.464	619.704	632.168	878.595	793.543	1033.87	1017.37	1085.45	1165.88	841.259	835.287	729.875	851.219	878.303	661.381	658.885	1245.12	1296.12	770.562	782.994	922.022	3896.77	3449.22	3624.14	3131.49	3184.72	612.308	992.626	1145.52	1086.67	1156.39	1143.86	967.024
X67	Kinetin	639.229	389.819	677.423	542.263	363.257	343.213	685.477	592.69	389.211	688.452	795.206	598.469	379.54	392.84	377.654	416.898	426.561	421.089	676.868	745.734	1096.69	1407.03	588.842	633.264	936.564	1012.32	1142.12	591.712	486.642	629.003	550.635	1497.99	1668.1	429.298	488.481	206.826	767.018	1116.52	972.869	1032.54	1079.78	437.532	430.215	357.415	452.565	436.732	465.145	458.459
X68	Kynurenic acid	772.297	764.066	1096.99	761.078	871.858	969.058	354.395	463.718	259.761	418.99	537.491	647.609	206.401	151.66	207.059	195.52	231.018	232.082	662.49	441.591	657.071	630.947	1006.79	857.476	398.855	186.783	274.128	448.053	339.782	466.986	315.441	541.543	663.924	369.89	273.195	784.187	1430.37	1282.23	1172.85	1048.99	1195.14	437.957	1453.53	1683.36	1521.11	1626.13	1431.68	272.22
X69	L-5-Hydroxytryptophan	2519.67	3997.2	3743.31	1803.2	3557.54	3931	4338.7	3718.07	2729.36	2854.77	3212.82	3129.99	3836.79	4267.91	4078.43	4284.48	5251.22	4133.11	6440.19	6605.72	6976.76	7650.27	6672.59	6500.16	4141.09	4840.88	4637.19	5694.55	5105.26	4860.73	4341.96	4658.26	5474.52	4493.19	3878.98	3908.87	3522.45	5611.7	3980.97	4108.97	4158.39	6674.15	6294.32	7075.47	4652.55	5732.86	5318.88	4065.31
X70	L-5-Oxoproline	41770.9	39338.3	53703.7	43995.1	32382.6	37442.9	40083.3	38816	39708.9	37402.8	43473.6	47286.2	39217.4	39295.6	40763.4	43163.5	42852.2	38916.3	50332.7	56738.7	45557	54886.1	44050.3	40165	42855.8	46704.2	54512.6	52435.2	42543.9	42079.2	40954.2	46775.7	48788.3	36445.2	38467.9	37018.2	47380.6	66062.7	59492	58747.6	58766.8	64643.4	59078	51895.7	54952.3	52002.7	52920.3	39472.3
X71	LAUROYLCARNITINE	9274.59	7437.94	7052.67	9500.04	5487.67	5762.31	2509.97	4948.15	4066.97	4400.68	5873.81	6896.36	4319.06	4931.96	4535.58	4909.3	5792.49	5527.39	7523.43	6746.28	11055.2	12440	12335.4	12663.9	5523.16	7126.23	7482.48	3641.56	4658.33	3625.86	4555.24	11072.4	13267.7	4619.98	5124.97	4599.61	11784.2	13805.3	11964.9	11667.1	13510.2	7530.62	6812.97	7390.2	6832.3	6724.4	7253.79	7670.43
X72	Lauryl diethanolamide	234.321	257.086	343.918	417.98	298.117	325.496	495.812	208.607	503.134	237.216	286.273	280.832	352.468	293.893	321.945	333.101	310.236	317.332	374.016	498.508	207.594	288.776	364.558	360.372	206.328	172.541	182.086	237.672	299.89	346.206	313.568	215.968	190.8	369.707	279.656	126.479	355.425	349.32	394.131	362.087	275.564	310.563	263.986	174.062	373.614	423.986	430.368	206.018
X73	Leucomalachite Green	3410.32	3274.86	3285.11	3814.37	3144.94	3140.57	3883.31	3114.42	3306.97	3291.8	3001.84	3081.64	3961.8	3547.92	3342.15	3473.11	3710.52	3335.76	3950.47	3889.1	3918.7	3956.93	3925.74	3828.53	4028.2	3936.43	3766.51	3786.41	3725.87	3954.98	3538.21	3976.33	3970.62	3856.61	3851.65	3916.5	3761.61	3774.24	3456.98	3382.81	3657.06	3551.17	3576.11	3694.39	3424.33	3363.03	3484.38	3487.63
X74	Levothyroxine	4775.47	6069.29	6845.68	4642.75	8797.31	7993.25	5890.79	5420.95	3761	5378.51	5324.14	5620.26	4868.35	5423.01	5520.08	3653.4	3533.69	4508.11	8735.47	6895.95	9766.72	10252.4	8199.57	8888.13	5400.43	6208.32	5962.74	6814.12	6338.15	8281.34	7440.06	8210.28	6934.12	5282.29	5001.74	3343.4	6374.97	7533.3	6781.49	6731.08	6311.76	12088.4	5680.75	6134.35	6523.38	5662.07	5384.09	7663.12
X75	L-Glutathione (reduced)	5162.88	1193.54	1429.99	769.157	1684.29	1453.11	1432.02	1153.54	1483.05	1478.56	1622.48	1546.16	2249.92	1697.14	2109.95	1387.93	1804.71	810.474	1463.72	1363.2	1425.13	1981.26	1453.98	1747.54	1522.02	1249.48	1714.33	976.164	753.077	1106.74	643.507	971.281	1179.13	1389.52	868.662	1008.1	1732.6	1147.12	2420.98	1279.81	3135.46	1342.08	1132.19	1529.14	798.46	648.187	1328.5	1879.64
X76	L-Homoserine	43497.5	34366.3	41309.5	47249	35208.2	36605.2	38707.2	42293.5	35775.6	46179.6	42785.5	47758.3	48122.9	45741.2	48169.5	40579.7	41806.4	39769	43608.8	41232.7	44601.5	51295.5	37465	37828.7	36751.1	38112.1	40412.9	46911.1	49733.3	43410.1	40852.6	44399.2	50940.4	39749.4	39593.3	40591.9	44118.3	47083.5	40347.9	46189	44709.5	44977.8	44599.7	45141	39414.1	37989.2	37810.7	45029.1
X77	Linolenic acid	6404.35	7712.27	7546.91	11299.2	3839.52	3742.74	6020.78	7486.89	7100.91	7625.57	7652.45	6963.1	5118.86	5696.87	5156.66	6301.07	6270.48	6339.93	7988.88	7305.41	8377.87	7247.13	6966.2	6693.91	7001.45	6278.08	6097.83	7414.23	6187.36	7599.17	6879.66	11180.4	9891.39	6868.32	6313.65	4649.61	11110.1	9410.75	10554	9907.7	9239.62	13943.7	10040.9	10526.7	10873	11567.2	10569.9	4792.31
X78	L-Isoleucine; LC-ESI-ITFT; MS2; m/z	6096.96	5382.92	6547.26	6248.41	6555.26	6619.78	8891.51	6491.9	4603.58	7626.14	7187.02	7015.83	8021.11	7104.73	7495.92	6769.82	6506.51	7064.83	7035.32	6957.58	7282.55	9297.96	7572.96	8091.12	7957.2	8860.69	9493.5	9398.64	10243.4	6785.58	7552.4	6274.79	6403.62	8754.64	8505.19	5492.38	8075.2	6828.8	6409.37	6566.25	6487.55	5766.88	7323.17	7099.52	6960.51	6688.1	6734.67	5954.29
X79	L-Methionine sulfoxide	4819.62	3405.7	4014.26	3099.67	3584.91	3556.95	4369.63	3838.85	2936.22	3858.33	4703.42	4243.27	3468.02	3888.4	3728.71	2797.61	3043.4	3138.5	4070.19	4776.82	5213.36	5528.8	4726.28	4245.54	2363.93	2310.34	2527.45	4554.45	4075.68	3499.94	3636.53	3647.13	3851.14	3289.04	3206.42	1546.36	3055.08	3543.3	2679.17	3454.76	3039.9	2097.87	1712.48	1712.67	1878.16	1979.66	1888.47	1162.42
X80	L-Norleucine	821775	696624	842316	767242	792732	816356	998032	786013	692903	810840	871598	819003	936247	968902	989841	838114	849031	818282	876128	813190	922497	970473	890837	837370	930250	1.03214e+06	1.08796e+06	1.18555e+06	1.13226e+06	916309	931729	762647	801832	962785	948290	687218	966195	1.0754e+06	981298	990531	957654	887813	1.04816e+06	1.0501e+06	977966	964572	1.0629e+06	927654
X81	3-hydroxyanthranilic acid	6783.15	4477.65	5987.51	4018.99	4293.72	4310.24	5442.29	8637.24	2551.57	8758.7	9946.64	9105.76	2955.89	3072.65	3134.38	2784.54	3000.79	2768.48	5689.62	7573.32	3427.94	4144.98	2884.86	2792.84	2923.16	2835.13	3224.6	3497.13	3249.85	3042.62	3061.89	440.7	409.257	4440.99	4549.45	1394.09	7205.43	10399.6	8789.94	9409.1	9401.69	3760.79	2937.39	2414.98	3364.75	3200.82	3245.12	2768.54
X82	Methamphetamine	3396.8	3445.39	3451.11	3567.44	3453.61	3375.15	3623.91	3293.59	3234.87	3391.28	3192.95	3200.09	3786.01	3789.86	3413.63	3464.67	3606.91	3499.73	3815.94	3636.33	3674.79	3617.71	3633.38	3674.03	3962.8	3950.7	3720.68	3759.8	3699.64	3652.48	3370.39	3790.31	3864.83	3711.48	3793.19	3745.23	3576.6	3586.41	3609.16	3574.61	3479.02	3459.94	3599.96	3487.93	3622.82	3436.6	3498.31	3544
X83	Methylimidazoleacetic acid	2160.88	2237.8	4732.15	2021.06	2125.21	1905.96	2976.95	3229.98	2733.96	3252.42	3215.31	3306.19	5208.71	5083.45	6243.39	5638.41	5581.31	5265.88	3537.67	3298.21	10224.7	13045.7	6505.71	5524.46	8685.56	9266.79	9322.2	5141.45	4861.58	4509.7	3892.18	7065.87	7265.98	4744.67	4908.37	6905.52	2341.42	2347.52	2211.37	2290.95	2396.25	12220.9	11710.4	9986.36	8113.12	6604.99	6838.79	6508.48
X84	Monoethyl phthalate	1419.77	1327.63	1365.8	1502.91	1390.97	1308.18	1466.84	1308.22	1378.58	1312.88	1304.73	1250.92	1305.31	1237.12	1330.26	1287.82	1365.42	1269.98	1573.86	1456.84	1533.74	1523.64	1513.16	1330.62	1476.91	1589.51	1415.14	1501.8	1292.26	1646.36	1619.63	1597.21	1438.11	1559.48	1516.85	1965.11	2659.3	3197.85	2719.7	2916.48	3085.46	2764.24	3180.14	3115.5	3057.91	2869.93	2920.32	2369.2
X85	N-(2,4-dimethylphenyl)formamide	316.347	365.863	412.971	335.22	472.384	394.356	465.48	451.403	394.659	450.277	438.722	370.129	366.097	419.047	417.221	384.849	490.06	415.083	816.608	866.231	710.931	806.83	738.929	714.678	732.463	752.815	745.541	883.025	1001.06	825.465	813.782	820.568	790.59	824.815	834.491	4887.41	9516.27	10649.8	9159.84	9675.26	9690.51	9783.12	9794.35	10353.9	10765.9	10051.5	10226	9314.56
X86	N6-Acetyl-L-lysine	6683.51	5273.97	5804.24	6597.81	6423.27	5967.74	8315.08	7507.56	4792.83	8477.33	8050.89	7140.69	6806.06	7870.92	7966.91	6040.96	6688.79	6129.57	6764.65	8211.92	6227.28	7039.59	6360.17	5909.79	4247.4	4426.11	5573.99	5887.02	5590.86	5890.79	6261.85	6428.44	7135.66	5627.57	5076.06	2230.07	4267.98	5741.6	4592.21	4764.93	4852.27	3766.78	2842.7	2415.7	3093.32	2905.7	2905.23	3658.67
X87	N-ACETYL-DL-METHIONINE	3591.96	1824.83	3074.34	2584.85	1708.17	1712.81	1521.34	1518.45	2870.18	1660.79	1839.17	2617.09	2013.33	2069.09	2125.41	2937.93	2859.02	2687.8	1238.41	1202.39	1557.74	1610.37	1715.76	1579.14	1177.15	1040.91	1344.82	1113.02	1222.07	798.334	904.952	975.149	1095.82	1100.53	991.899	2965.92	3526.83	4290.99	4175.53	4109.28	4461.87	2700.32	4219.72	4884.28	2955.62	3373.51	5415.89	2476.7
X88	N-ACETYL-D-MANNOSAMINE	14196.3	9452.31	12757.2	13611.1	9777.29	9717.31	14153.1	13018.6	15654	11956.9	12878.9	13394.2	13118.1	12890.9	13501	16278.4	14879.7	13044.7	6220.83	7675.52	5262	5881.81	6348.69	5753.83	4389.89	4308.01	5795.48	7380.72	7571.3	6733.19	6740.34	7153.98	8540.74	7537.09	6438.36	6918.97	8404.4	7965.27	7346.99	8606.2	8086.69	12021.7	11292.1	10567.7	8439.19	7536.21	8965.15	7301.73
X89	N-ACETYL-D-TRYPTOPHAN	312.929	927.757	312.32	532.129	955.308	843.622	816.789	344.048	141.929	444.251	418.107	229.48	447.654	496.734	623.06	922.75	1183.02	1031.6	1973.09	2501.4	2516.07	3100.68	2175.87	1908.89	1106.05	1074.05	1363.44	1754.25	1449.47	1593.92	1621.8	1336.65	1461.04	2385.72	2381.38	656.798	169.327	323.02	212.069	198.555	201.793	388.32	471.207	280.655	610.74	347.573	233.12	565.829
X90	N-Acetyl-L-carnosine	1717.17	1437.03	2977.52	2242.48	1639.59	1346.24	3251.54	1428.77	1628.72	1403.07	1782.52	1597.47	2370.93	2346.9	2679.54	2275.54	2387.11	2051.41	1798.17	2472.16	2927.36	3718.11	2210.83	1792.46	1843.53	1911.78	1953.01	2196.99	2013.26	2035.64	2016.73	1805.55	2101.82	2007.03	1689.91	834.5	1456.83	2224.4	1814.1	1852.38	1645.08	482.138	1663.99	1439.07	2053.24	1522.31	1867.18	1574.97
X91	N-ACETYL-L-LEUCINE	1451.49	1607.82	1733.58	1471.46	2362.52	2185.93	2809.08	1855.46	1813.15	1988.76	1922.97	1537.71	2207.52	2408.65	2530.27	2144.02	2174.18	2176.24	2571.41	2411.08	3166.83	3620.19	2049.07	1874.64	4799.34	5406.19	5814.93	4932.39	4134.58	3972.1	3828.98	1734.62	1779.55	3974.92	3678.99	2428.26	3116.28	3870.82	3549.74	3615.84	3579.63	3604.99	4283.95	4356.47	3703.75	3246.39	3045.93	3979.37
X92	N-Acetyl-L-tyrosine	130.411	271.584	89.5134	331.058	243.838	252.157	413.231	175.897	91.2218	241.622	105.852	141.69	157.268	169.035	210.718	160.465	168.499	181.808	1316.36	1412.88	837.894	1114.14	1153.59	1083.07	906.725	1071.16	1093.37	1539.29	1119.39	1209.68	1098.72	311.06	339.054	1412.74	1376.52	37.8818	73.5699	114.492	63.3505	78.5464	76.2001	116.237	65.3376	57.6122	73.5482	59.3373	41.4444	74.3093
X93	N-ACETYLSEROTONIN	12977.8	5170.43	6296.5	3198.21	4959.18	4506.22	2860.25	11457	2698.27	11877.3	12474.8	15419.9	3705.55	3745.58	3717.48	4920.97	4991.47	4688.53	1450.89	1234.7	2162.75	2400.79	993.334	1108.77	1688.14	1548.69	1561.82	941.319	1404.74	1018.2	1585.23	2076.59	2745.36	2356.93	2230.73	3462.8	12948.9	12618.4	11209.8	11010.4	10810.3	1713.26	3564.36	4439.82	2283.19	2427.74	3489.93	3380.89
X94	N-alpha-Acetyl-L-ornithine	47337.7	49993.5	57700.1	71192	70227.9	70878.1	1949.48	2064.32	1146.11	2133.09	2242.13	2042.14	1449.81	1640.21	1820.12	1370.9	1441.37	1277.61	49197.5	59134.2	37904.6	48236.2	49399	47893.3	1812.21	1864.99	2186.69	1966.95	1856.09	1886.26	1774.09	2430.75	2790.79	1764.74	1535.01	949.512	35926.5	38158	33000.2	35334.1	35785.4	947.208	1141.71	1303.83	1500.89	1405.33	1527.87	1202.95
X95	N-Carbobenzoxy-beta-alanine	148.139	246.119	888.064	666.561	649.367	471.648	325.851	248.45	91.651	279.759	310.945	239.496	111.038	99.3711	124.884	123.43	169.806	122.6	278.685	408.597	133.892	157.523	103.638	101.897	67.7206	50.7832	21.7943	124.655	108.331	98.5478	104.613	267.033	259.92	136.583	127.07	342.117	307.94	388.887	282.025	154.01	254.687	79.685	368.46	398.953	282.129	227.018	178.843	265.215
X96	Niacin; LC-ESI-QTOF; MS2; [M+H]+; CE	718.431	1034.87	1058.75	982.603	921.325	889.929	652.863	583.345	654.81	671.921	658.399	851.602	785.507	785.804	819.619	953.296	861.247	886.288	909.186	992.611	878.637	863.783	842.205	885.987	804.816	784.198	876.041	930.568	877.801	951.289	924.205	1031.71	1038.7	962.622	985.244	931.088	1090.61	1242	1497.72	1270.75	959.295	1743.29	1259.75	1016.41	2145.68	1800.72	978.987	857.878
X97	nicotinamide	42735.3	39660	52925.4	42438.9	35118.4	36041.6	33256.7	31264.7	44217	32422.7	32286.4	39759.8	39452.9	39720.7	39227.9	50299.7	49876	47086.9	36501.2	34263.8	23462.4	24658.6	27581.2	25664.6	19235.7	17975.1	23279.4	16985.1	19737.7	15445.2	16960.4	20159.9	22299.7	25717.2	23492.8	30931.7	30028	34934.3	32445.9	33231.1	35637.6	32376.6	37547.3	39457.8	32965.5	29862.7	43688.8	33343.2
X98	Nicotine	131.684	114.165	166.061	128.281	147.22	104.745	199.46	103.444	136.053	112.033	109.115	121.884	122.338	105.753	118.356	123.719	115.847	110.983	114.487	166.814	131.443	163.546	156.233	192.588	203.687	143.281	168.043	127.224	91.7123	130.09	98.9439	117.347	177.47	163.081	152.126	245.3	411.976	489.812	316.451	343.549	380.861	424.088	657.75	500.68	503.474	455.429	401.575	281.213
X99	Nobiletin	270.314	163.048	113.562	141.062	175.656	300.882	146.223	178.638	46.2008	213.998	169.754	190.196	310.341	260.671	149.956	158.529	187.381	332.478	1159.1	463.105	294.367	936.349	458.444	546.06	852.357	362.701	447.097	473.917	434.21	5067.86	2117.95	670.06	4327.09	539.046	306.789	492.347	457.1	563.303	531.881	425.387	478.599	487.884	365.044	911.756	449.363	491.299	314.724	456.148
X100	Octopine	7149.5	3528.66	3653.3	5109.43	3302.3	3377.01	3374.11	3429.21	2609.38	3277.81	3731.45	4941.67	2015.59	2146.17	2236.6	3882.5	3577.71	3053.48	2251.24	1883.95	1564.07	1566.84	2108.96	1735.72	1444.46	1561.98	1889.65	1348.07	1483.64	815.157	922.654	1498.9	1794.99	1009.74	940.856	3200.6	6333.38	8063.76	6580.52	6898.14	5181.13	3270.9	5414.09	5484.37	5016.93	4730.65	7052.17	3277.53
X101	OPHTHALMIC ACID	799.774	1243.91	1249.44	923.759	448.094	431.687	2712.46	1053.63	1699.8	1092.8	1147.25	1410.83	2299.6	2248.08	2436.81	1197.14	1199.66	1151.5	885.5	808.228	2326.85	2701.7	980.811	882.196	2612.32	2165.12	3028.82	754.069	766.969	1440.75	1443.39	3556.35	3606.36	726.657	564.938	1273.27	1060.96	1657.37	1452.17	1438.54	1695.08	7923.12	2962.59	1992.89	1377.81	1112.12	1260.98	4542.2
X102	Palmitoleic acid	7003.44	18522.9	8749.34	11112.7	8783.17	7828.49	6900.65	7533.58	6300.84	7837.34	8428.08	8068.75	5074.76	5241.39	5198.01	5941.3	6200.65	5492.43	7230.85	8724.89	5962.1	6132.96	6804.14	6266.59	8112.34	9039.77	8396.26	8385.73	7134.19	7332.16	7207.16	11170.9	11795.4	7524.46	7413.39	4439.19	11408.6	11072.6	10799	11135.9	10131.2	11434.2	9186.72	8848.79	11346.8	11121.8	10378.7	5362.25
X103	Phenazine	146.855	157.5	183.218	169.84	193.555	151.704	209.962	190.724	194.635	152.664	192.675	149.833	123.428	134.022	128.861	117.957	175.701	151.385	238.201	213.849	218.507	277.806	249.637	208.466	229.024	214.828	211.523	288.397	360.798	282.295	265.634	268.278	222.828	244.691	258.477	2122.29	3527.36	3766.33	3384.25	3621.28	3364.43	3544.58	3772.14	3879.88	3516.26	3516.07	3754.18	3723.39
X104	Phenazone	4081.13	4223.21	4497.81	3476.14	3541.76	3938.52	2245.2	3830.62	3715.95	3485.49	4336.41	4479.28	2009.25	1965.88	2329.88	4630.67	4576.52	4541.5	6314.46	5221.18	5079.91	5778.66	6015.62	5793.57	5123.53	5975.16	6580.81	4594.94	4029.71	2651.1	2455.02	3904.79	3798.46	5649.6	6051.32	8246.12	9941.86	11013.9	9842.49	12421.9	8760.14	5013.21	9916.37	9551.33	12082.2	11200.5	12999.5	2419.16
X105	Phenylalanine	928713	804106	980587	969829	758378	746246	961808	802412	824181	793085	922135	879402	883077	985325	980149	871228	846194	811278	1.1941e+06	1.22928e+06	1.40564e+06	1.62546e+06	1.30433e+06	1.23433e+06	889101	943392	1.05224e+06	1.09193e+06	1.14989e+06	927992	903962	944970	1.0212e+06	993620	992465	889499	1.10655e+06	1.16584e+06	1.17508e+06	1.17678e+06	1.06074e+06	1.27151e+06	1.23084e+06	1.23437e+06	996468	1.16293e+06	1.06115e+06	1.08569e+06
X106	piperidine	123096	96851.9	119379	105848	112458	115335	139722	112172	98426.4	103026	114461	111895	135036	142888	139139	112906	110595	110783	115038	103582	127164	128842	116475	107100	125560	133697	140548	160979	146118	120041	121295	101344	112325	127315	124289	91609.3	128991	152197	145138	135268	132284	134227	143557	147610	136327	134122	152312	128789
X107	Pyridoxal	1854.34	3086.71	4192.83	2796.92	4270.48	4242.89	2970.37	2842.1	2634.43	2723.93	3909.31	3486.87	3765.7	3751.49	3932.45	2597.22	2731.06	2900.6	4602.66	3880.54	5208.81	5130.47	4285.45	4059.48	2032.53	2114.49	2839.76	3646.08	3730.53	4087.59	3711.28	2593.72	2672.46	3741.39	3223.59	1792.66	2927.81	2880.46	2586.54	2692.52	2769.01	2897.47	2556.41	2924.93	1929.21	2247.57	2022.8	2885.25
X108	Quinoline	7578.52	12973.9	29506.3	21865	37618.5	38420.2	642.437	531.243	479.274	526.783	680.889	583.742	407.079	440.565	493.577	1245.15	1166.49	1164.21	17834.3	39019	6570.7	7578.45	2589.11	2561.83	405.503	367.856	428.815	798.853	746.858	448.888	497.605	1008.03	1130.46	1162.41	1100.69	504.733	1909.82	2478.52	2268.96	2240.56	2238.67	631.996	1141.93	1199.24	1169.71	1115.13	1034.52	279.232
X109	Quinolinic acid	156.978	143.475	380.16	272.004	179.584	114.978	381.266	450.666	85.5751	460.96	612.393	542.984	242.254	291.322	233.028	301.176	484.307	367.069	158.394	257.107	398.778	486.709	166.77	164.707	201.486	231.734	258.192	333.793	281.598	213.146	270.847	1231.37	1430.74	430.096	371.265	14.4833	209.97	233.696	228.525	236.939	208.025	90.5989	51.5753	83.2987	150.498	202.467	234.938	145.022
X110	Riboflavin	974.876	1629.53	1585.02	1450.9	1215.4	1221.32	1184.88	1216.22	1191.72	1324.85	1333.6	1225.77	909.286	1020.19	1079.65	785.948	884.037	767.941	1532.04	1645.32	1479.8	1615.99	1213.8	1111.41	1067.36	1242.79	1337.14	1512.38	1399.79	1257.5	1458.05	2043.27	1897.76	972.583	947.523	346.13	827.516	1310.01	1143.58	1021.95	1174.77	960.831	965.748	901.343	912.689	764.053	806.08	887.934
X111	Pyruvate	813.999	806.516	961.003	1419.52	1059.21	952.73	1171.99	1032.67	851.324	912.28	918.426	1072.23	986.565	909.897	991.667	1104.12	1281	1009.6	934.838	1057.46	1445.99	1544.57	903.727	1088.36	1314.85	1478.06	1535.59	1356.41	1346.46	829.772	1159.24	1734.14	1881.04	1566.29	1432.75	544.373	890.774	1045.4	941.625	943.645	848.373	897.866	661.221	674.813	894.434	814.824	977.999	818.525
X112	Glucose	656199	762642	607769	544030	839638	948693	1.04544e+06	859729	738864	902878	967772	698546	939003	922330	942585	742896	754734	801828	932358	1.03261e+06	963949	1.00835e+06	909443	834157	748953	890858	917413	1.21022e+06	1.0184e+06	1.11811e+06	1.00152e+06	1.25899e+06	1.15964e+06	1.0568e+06	1.03482e+06	388540	294279	395235	347024	388424	338387	878465	773085	711238	593940	540900	328835	619641
X113	S-Adenosyl-L-homocysteine	12317.8	6592.13	9408.46	3935.93	8402.81	8309.33	5046.98	6615.18	7870.75	7149.23	8187.65	9624.05	9372.14	9378.68	9406.71	8272.47	8635.89	7840.97	3519.33	3722.46	4232.15	4761.48	5373.39	5444.47	3272.42	2860.02	3581.9	3071.67	3703.48	2241.1	2089.95	2711.65	2992.6	2403.94	1846.41	1563.05	3707.98	6181.53	4638.62	4736.54	6498.38	4443.57	4238	3999.89	4164.77	4545.93	3585.49	3209
X114	Secopenitrem D_120253	91982.9	122487	149837	125243	217322	221435	206535	123597	70049.6	138191	132454	115135	129494	114918	129193	70743	75276.9	71765.7	140099	193839	68410.7	84292.8	80933.4	70808.1	66928.8	63805.2	68863.2	148098	156778	128894	118937	100525	71251.9	117657	129043	43773.3	95632.7	140012	136713	115930	110301	386393	133860	96192.8	154975	125842	92439.9	235225
X115	Sphinganine (C17 base)	23712.9	21560.9	20658.3	21842.4	21770.1	20939.8	20715.8	20048.8	21602.4	19705.9	21208.5	21212	22169.2	21086.7	21708.1	21513.3	21312.2	21994.8	22582.8	22640.4	22274.1	21948	22142.1	22994.9	23597.3	23620.2	23097.4	22895.5	22144.2	21599.1	21532.5	23557	24529.7	22316.5	23104.5	24580.3	22789.6	22538.5	22034.6	22047.7	22751.3	22500.4	21430.3	23363.1	22905.7	22824.4	22647.7	24477.9
X116	Taurocholate	8338.13	18792	9371.96	30411	34956.7	34991.5	103215	110666	118582	111640	139426	123114	90010.5	87542.2	76576.8	45981.9	46660	43131.2	28191.5	13527.5	66310.5	79408.8	192736	182607	25429.5	15017.1	17095.8	57058.4	55450.3	45129.3	41259.1	82802.7	88135	30768.2	30922.3	60651.9	29890.9	34154.9	29688.9	28111.1	25396.7	34135.2	11275.1	9275.25	54581.9	51482	47993.5	61239
X117	Tetrahydropyran-2-methanol	1174.57	1256.15	1198.15	1254.69	1244.67	1292.27	1191.66	1194.11	1219.88	1247.04	1218.31	1165.43	1193.23	1191.37	1251.55	1282.45	1239.92	1260.29	1207.46	1163.22	1179.43	1189.51	1204.63	1196.32	1232.47	1194.53	1221.39	1207.68	1247.92	1257.74	1170.05	1184.6	1186.52	1190.7	1190.48	1124.97	1107.33	1246.07	1244.98	1309.26	1293.17	1302.13	1341.05	1302.34	1328.85	1310.64	1392.61	1264.87
X118	Thromboxane B2	9071.03	1732.63	15737.4	7235.57	1135.09	1074.21	687.158	4534.85	5580.01	4900.43	3773.71	8651.41	2889.36	2970.07	2938.34	2632.33	3063.47	3163.32	7575.54	4937.67	9700.37	5490.78	4975.89	3838.8	1692.98	1974.26	2575.44	8535.96	7352.49	1174.17	1216.92	13012	10967.9	3671.52	1920.54	581.792	1223.34	934.769	1225.35	1561.52	1445.25	3743.67	6004.54	7078.95	2448.62	2970.23	6993.19	3722.53
X119	Thymine	2550.09	1942.15	1946.09	2532.9	1787.68	1772.64	2753.22	1990.34	2228.83	1917.27	2327.52	2153.07	2036.21	2071.92	2113.95	1959.69	2073.69	1967.88	2255	2701.56	2010.14	2434.64	2301.8	2345.61	2082.94	2435.77	2527.74	1833.95	1638.1	2181.03	2232.82	2133.93	2402.36	1957.36	2013.94	1743.86	1989.38	2689.45	2340.16	2427.11	2377.11	2737.33	2352.76	2136.86	2156.38	1946.91	2184.08	2034.63
X120	trans-3-Indoleacrylic acid	3207.5	7456.67	18100.8	12998	24004.2	25369.2	903.803	414.714	352.872	444.826	495.531	491.232	383.152	424.495	424.761	1201.66	1231.99	1191.25	13181.5	27601.5	2809.85	2962.53	1448.86	1539.24	211.893	175.897	205.381	485.839	468.386	501.656	426.548	708.297	772.326	1299.71	1332.11	259.227	594.244	918.141	856.611	856.006	816.467	406.561	831.815	908.239	824.095	651.175	605.43	169.01
X121	Trehalose 20 eV; [M+Na]+	7752.26	18360.8	26242.7	5588.81	9760.19	8568.64	18952.3	8715.5	12884.9	11247.7	9091.59	19575.5	8059.82	6568.81	9130.88	7383.04	7071.71	7630.25	24907.7	5430.35	12877.4	8851.78	16608.3	10937.8	9618.94	7292.16	7476.06	15764.9	9540.58	9194.14	7040.2	10174.8	11660.9	8093.61	4664.43	8124.32	1560.66	2053.65	1977.27	1181.22	1794.86	10429.1	22817.6	12349	25996.3	4602.94	3237.78	2330.26
X122	Tri(butoxyethyl)phosphate	748.038	3602.02	125224	230.342	801.867	13686.5	348.16	54446.4	10673.2	23237.3	1179.98	381.065	20838.3	1269.06	731.254	3448.81	2066.82	2074.48	727.731	79.6719	1022.99	1385.21	463.98	1061.88	2145.61	430.547	2425.63	182.101	725.202	2993.22	3746.4	3280.03	915.494	3096.63	485.872	0	127.155	0	0	49.4041	131.189	42.589	104.859	92.7544	0	0	0	0
X123	Tributylamine	755.659	868.118	956.559	823.64	1007.04	784.486	985.582	832.772	847.959	921.265	877.919	802.72	900.814	884.843	941.75	973.533	880.346	850.54	941.629	897.493	911.493	832.895	909.593	989.571	898.758	872.103	986.37	945.151	943.648	1256.17	921.781	962.308	900.224	915.226	885.174	950.375	1013.4	569.016	589.411	563.677	529.656	505.663	551.012	549.925	634.482	577.776	555.127	423.069
X124	Triphenylphosphine oxid	16867.6	15093.9	14755.5	15835.6	14470.9	14185.7	14999.3	15012.1	15059.6	15363.5	14555.4	14398.6	15367.5	15019.9	16340	14296.1	14275.9	15774.2	16800.5	16866.5	17096.6	16479.8	16422.4	16885.9	17790.3	17827.2	17451.6	16083.5	15644.4	15650.7	15334.2	17868.9	16812.9	16214.9	16248.4	18488.2	18188.5	16843.9	16862.3	16370	16285.4	16654.5	15822	16425	16780.6	17448.3	16433.8	17481
X125	Tris(1-chloro-2-propyl)phosphate	4015.23	4116.63	3708.82	4008.6	3655.29	3751.92	3680.12	3915.63	3782.98	2913.38	3429.15	3406.25	3453.43	3339.38	4045.86	4062.64	3697.8	3806.29	4556.28	4064.46	4194.95	4100.08	3976.81	3959.23	4195.28	4421.45	4864.48	3950.22	4219.6	4324.44	3856.44	4164.73	4501.54	3858.15	4382.24	6334.75	5754.55	4254.51	3861.37	4627.64	4568.32	3985.04	4549.32	5482.32	4108.17	3830.15	4350.24	3699.61
X126	Tryptophan	713352	1.06318e+06	918858	697722	987530	1.02176e+06	1.25699e+06	891268	708184	898803	1.12718e+06	901951	1.10171e+06	1.0976e+06	1.13472e+06	1.26647e+06	1.33958e+06	1.23509e+06	2.04453e+06	2.08429e+06	2.21797e+06	2.53409e+06	2.12658e+06	1.98495e+06	1.38884e+06	1.57599e+06	1.56125e+06	1.84007e+06	1.67322e+06	1.36667e+06	1.47794e+06	1.69782e+06	1.75791e+06	1.68378e+06	1.63168e+06	1.08921e+06	992693	1.22657e+06	1.16559e+06	1.13843e+06	1.04699e+06	1.68508e+06	1.87809e+06	1.72608e+06	1.41776e+06	1.38253e+06	1.38984e+06	1.3817e+06
X127	Tyrosine	561762	525194	634718	740121	532298	531497	774383	593352	578505	599545	667212	618178	585395	608463	616544	663093	673971	648998	795474	749230	786659	887445	715717	682956	596492	667268	682853	787297	749385	629649	643255	724158	762304	640630	626735	458202	656080	787164	711365	712295	730357	861039	661161	625878	625646	616523	675471	560381
X128	Uric acid	146045	95365.3	116193	108128	117456	110918	112684	133379	181121	135150	138688	148963	109141	115579	110588	147358	141285	134102	103602	88619.6	102499	109237	103791	94624.1	135657	141190	137330	83460.6	87930.6	70169.4	75676.1	162824	195502	97807.9	86454.7	171865	258557	302830	272286	270583	247828	249251	236257	224786	211360	200699	277053	167202
X129	Valerophenone	781.477	799.535	911.071	841.194	846.851	779.322	877.453	888.763	969.801	879.491	855.793	857.987	786.142	809.44	831.578	787.901	777.243	808.406	1045.44	1379.94	1047.21	1311.27	1046.97	978.381	1213.65	1006.82	977	1109.2	1080.85	1011.98	1042.4	1079.4	1111.1	1084.49	1253.49	9097.59	15041.9	16648.2	14872.8	15215.2	15495.1	13783.5	14811.7	15376.5	14625.8	14920.7	14961.6	13415
X130	Vanillin	809.949	1193.87	817.739	732.476	951.518	932.672	867.885	836.288	849.941	785.248	829.122	762.032	818.199	775.059	1142.58	774.164	870.298	815.606	852.296	765.237	784.969	754.15	871.024	743.398	880.497	891.55	1007.67	791.901	771.254	838.04	744.644	794.02	776.053	800.495	892.584	1398.1	1402.79	1280.44	1303.68	1350.02	1343.09	1402.35	1361.77	1307.28	1289.9	1221.56	1337.26	1086.73
X131	GAMMA-AMINOBUTYRATE	800.065	919.466	1094.14	1399.52	930.162	824.966	910.131	799.964	949.116	824.849	823.03	900.481	972.971	926.337	906.186	768.243	957.162	823.059	1243.92	1004.91	1160.37	1347.12	809.488	884.687	850.366	850.59	941.013	792.746	763.251	796.824	816.681	734.68	943.646	767.507	578.847	622.149	988.555	1020.49	901.377	940.467	947.476	677.62	622.7	682.037	684.053	703.029	863.477	733.549
X132	GLUCONATE	2680.43	1866.53	2888.32	2593.63	1996.09	2334.13	1399.82	1582.04	2799.8	1611.76	1721.31	2213.59	1659.97	1625.02	1966.15	1676.14	2093.05	1758.37	1053.11	4242.93	932.243	1031.49	1081.63	1128.75	907.791	803.533	1050.08	830.157	891.196	1235.84	1241.8	1440.84	1936.89	877.531	1211.66	1784.31	2187.51	2189.68	1971.44	2191.36	2228.25	1600.24	1841.25	2227.61	1753.97	2321.47	2910.91	1566.86
X133	QUINATE	979.94	974.981	2123.45	2427.34	1234.93	749.856	897.823	1003.93	554.073	653.967	1027.73	644.471	977.185	1175.83	951.921	797.75	753.653	391.723	694.338	1222.07	400.38	1049.13	729.833	1262.65	843.633	745.719	904.336	615.66	1262.74	691.525	940.713	0	658.483	1072.55	1245.69	1146.79	2229.32	2357.28	2648.64	2019.82	1960.75	3412.56	1995.3	1046.84	1596.11	2337.92	2217.04	2646.46
X134	ADENINE	406.768	597.103	434.161	651.544	777.336	677.165	519.618	364.746	377.068	402.27	424.709	327.926	422.803	497.532	504.819	747.59	796.705	712.833	734.208	826.091	995.235	1172.97	853.062	943.562	733.166	693.289	861.196	493.706	501.014	555.591	590.408	780.234	798.36	649.849	673.457	131.751	119.395	167.745	174.546	154.053	165.964	210.758	128.939	205.095	153.853	151.868	130.177	81.4811
X135	OROTATE	266.298	159.127	214.824	365.679	247.391	226.004	164.976	233.805	133.448	213.745	349.694	399.505	179.204	146.551	185.863	197.217	125.998	149.658	149.582	141.386	139.353	180.974	174.967	143.959	119.538	111.998	102.306	106.881	97.2304	80.7189	59.9728	134.355	88.0345	58.0577	66.3799	139.437	147.485	197.216	140.016	176.757	160.098	168.97	181.78	166.389	128.562	82.0135	60.4522	133.004
X136	URIDINE MONOPHOSPHATE	49.9585	74.81	56.7334	48.6363	39.1288	75.3407	48.2197	51.0845	31.672	0	47.7295	18.828	26.2059	0	28.554	0	0	17.8311	42.584	79.6281	92.7413	148.265	24.6033	25.8825	237.886	375.344	243.948	66.3134	27.7536	33.245	9.69281	570.749	510.823	45.5531	28.0627	150.045	466.138	429.967	323.728	310.377	235.518	499.362	209.342	134.142	496.863	492.347	383.978	143.026
X137	DIHYDROURACIL	52051.7	65144.5	69450.3	81637.3	52664.6	57247.7	60878	63475	56184.8	71656.7	59711.7	65518.7	65201.6	62886.5	66020.7	59544.8	66926.9	60952.4	85088.5	77054.2	71206.4	86714.4	60616	67455.9	81468.6	91239.7	92806.8	74080.1	79983.7	81140.9	69409.6	62460.3	74887.8	62883.8	66767.7	65306.6	52883.1	64514.8	45696.7	62705.7	57175.4	60019.7	60271.5	56043	63520.1	59841.6	49040.6	72900.5
X138	2-aminoisobutyrate	37.4781	127.08	129.041	214.085	124.738	202.921	711.42	314.401	166.372	583.715	169.303	95.7559	185.397	301.746	269.935	234.52	311.658	322.73	96.9939	268.629	136.445	110.46	126.236	190.839	115.651	210.694	68.073	383.356	560.444	252.393	244.218	273.215	433.357	376.767	452.252	37.6813	71.7263	103.893	69.5668	142.365	108.198	150.581	111.337	60.963	106.403	136.1	135.692	82.2248
X139	TRANS-ACONITATE	1997.47	2351	2751.54	3327.64	3070.87	2917.28	3053.46	2674.21	2529.63	2635.28	2306.05	2861.32	2517.21	2356.53	2820.57	2892.15	2919.87	2679.92	2115.32	1832.4	1694.76	2113.72	1598.55	1615.99	2222.46	2246.4	2402.68	1964.98	1853.22	1474.14	1673.54	3370.42	3781.34	2508.79	2350.54	984.952	2296.05	3013.79	2554.38	2540.45	3026.66	2704.09	1760.75	1515.32	2596.09	2334.52	2514.22	1871.18
X140	HOMOCYSTEINE	239.752	280.304	411.07	457.112	255.651	310.884	369.711	348.896	333.938	359.886	431.527	346.036	428.727	431.754	409.877	381.057	406.667	406.571	617.125	552.061	646.999	704.805	548.846	620.935	503.655	505.137	480.824	544.465	504.808	418.348	360.846	391.684	451.351	242.702	324.509	281.9	411.599	526.911	395.585	488.159	453.036	540.473	526.016	443.408	499.504	443.154	408.677	679.4
X141	TREHALOSE	569.934	1016.19	597.599	789.061	1392.98	1700.71	1532.91	2056.66	1389.36	1848.54	1718.09	991.94	1539.32	1327.08	1441.74	1020.7	1284.73	1090.84	1520.1	1116.76	1082.03	1946.46	1396.85	1167.53	1742.84	1082.67	1344.79	2203.83	2055.89	2242.81	1967.64	2069.64	1782.11	2227.43	2333.19	476.228	0	215.384	322.151	340.548	0	1784.43	1159.33	1423.28	1017.5	775.665	210.666	1101.66
X142	BETAINE	5484.27	7092.05	5884.11	5580.98	6913.39	16555.1	7588.16	5252.74	4072.72	5438.92	6490.21	4016.62	5517.97	5457.61	5075.16	3552.76	4023.41	6862.78	17069	30681.1	14592.2	11935.3	14293	5728.97	7574.66	8870.64	7398.59	17048.5	7727.19	7878.09	7736.06	17245.5	7671.66	7061	7506.21	2525.48	2994.92	4273.48	3682.8	3285.82	2656.46	3601.61	4331.04	3357.04	3364.34	2957.39	2294.34	3520.12
X143	2-DEOXY-D-GLUCOSE	38434.2	21906.9	40785.5	28308.4	28268.1	29588.4	22355.3	29892.5	14673.5	24752.5	26864.6	26499.4	21368.4	22253.9	23316	23036.7	22312.7	21028.3	28153	35749.1	35078.5	41319.2	24420.2	24798.5	22691.9	24747.9	24322.4	25182.9	25005.2	20640.1	19000.6	25026.8	28618.7	22413.4	22021.6	20104.2	51332.5	42301	35353	40993.7	39295.5	16479.8	19894.9	18533.7	24072.5	23349	24005	18427.7
X144	DOPAMINE	1143.36	1443.43	586.743	1315.69	1675.21	1466.7	1887.5	2742.27	1711.93	2781.66	2255.55	1931.84	1731.16	1763.59	2282.85	1421.62	1698.6	1463.86	1119.24	1284.3	2551.12	2319.44	1710.82	1548.45	2962.15	2498.02	2816.92	3838.02	3141.83	2620.42	2346.16	4723.42	3755.55	2415.01	2210	3227.82	4800.74	5001.96	5017.13	3872.25	3786.04	4950.8	1568.57	2944.54	2314.85	4596.22	4732.32	4930.4
X145	1-AMINOCYCLOPROPANECARBOXYLATE	2920.32	2479.82	2945.79	3061.45	2677.81	2581.8	3599.07	3139.23	3129.19	3156.56	3498.91	3344	3562.43	3604.47	3724.09	3247.57	3417.82	3341.4	3657.66	3859.68	3731.38	4351.35	3663.28	3636.46	3340.03	3414.08	3748.04	4325.96	4128.3	4348.07	4531.63	4581.41	4855.59	4424.17	4306.27	2454.93	3581.69	3871.71	3611.36	3338.8	3516.81	3479.07	3306.05	3327.95	3241.47	3068.64	3737.67	3380
X146	PICOLINATE	2035.79	963.547	2458.37	1495.9	1812.59	1969.89	1025.6	768.268	1076.6	1199.21	1267.21	1046.31	1631.43	1712.99	1337.21	1319.68	1736.05	1803.21	910.792	1264.1	2606.24	2711.75	1414.25	1822.23	2130.44	2473.08	3294.29	2395.67	2245.76	764.951	1239.83	5178.66	5649.18	2343.92	2487.86	2305.32	902.605	893.163	821.371	857.264	1032.5	4943.57	2133.15	2864.87	6429.47	6237.41	6709.97	2264.21
X147	N-ACETYLGLYCINE	177.927	88.5463	134.766	97.2074	57.8065	105.574	56.3112	57.75	97.0577	75.8259	100.178	50.8568	55.8555	42.6194	41.047	57.7895	51.0761	81.95	135.762	94.4586	264.711	338.81	160.74	113.44	103.944	108.803	109.465	34.7728	47.4206	40.857	56.0397	144.67	181.35	43.2884	71.8216	106.882	643.69	995.625	770.448	892.336	962.095	197.466	231.857	205.412	216.206	331.297	289.977	170.2
X148	6-HYDROXYDOPAMINE	88.5387	127.094	70.683	186.978	140.875	103.913	116.21	197.987	241.774	202.401	163.282	54.2302	93.6561	162.146	225.373	139.752	121.51	54.6084	59.1953	84.8419	128.157	137.356	66.1188	95.1367	132.005	94.9778	151.459	217.983	28.0139	83.6536	89.3908	229.851	228.644	101.866	72.3877	190.867	416.821	406.513	291.496	383.763	342.69	149.261	79.6131	164.979	262.171	178.245	269.399	543.273
X149	N,N,N-TRIMETHYLLYSINE	17099.6	11476.7	16265.5	17047.3	11717	12883.1	2459.51	6680.73	5012.11	7602.14	4558.83	12023.1	3803.94	2899.03	3191.64	4960.64	6909.84	4538.14	9611.52	10180.5	5759.89	5786.37	4721.49	5107.87	4105.09	4321.92	5303.95	2106.29	3489.53	1064.4	992.848	2571.82	2557.89	2508.54	2766.92	8724.59	20063.3	12765.4	11215.1	13164.5	12862.3	3749.91	5286.59	5093.52	8258.64	7269.91	12301.4	5800.98
X150	O-ACETYLSERINE	485.212	524.517	681.378	690.132	417.232	450.302	630.777	555.428	746.801	559.004	490.357	506.53	510.153	624.745	676.295	666.985	677.882	646.779	620.799	620.496	763.056	816.516	389.586	465.646	738.306	778.909	1012.06	638.647	617.407	572.703	443.483	342.617	344.228	441.513	364.057	612.535	376.064	581.968	472.415	581.726	503.954	554.191	912.896	683.51	757.275	637.045	612.563	779.949
X151	ADP-GLUCOSE	128.755	427.757	249.102	496.746	0	145.988	952.494	849.137	1062.37	1512.55	1035.6	1181.1	2363.39	2325.78	1811.73	1339.08	1837.78	1905.44	880.624	418.122	637.691	208.964	183.727	414.138	755.841	504.454	288.584	1538.07	1432.16	1646.43	1210.73	864.957	406.767	1266.21	1467.65	473.749	580.421	375.03	498.557	595.251	681.492	291.972	414.209	448.051	783.127	358.77	467.151	1355.06
X152	3-NITRO-L-TYROSINE	707.648	373.691	691.791	534.678	254.632	221.824	251.175	207.94	515.476	222.424	217.095	307.175	179.678	256.431	275.053	477.335	483.632	416.516	149.39	138.391	271.016	431.04	147.371	106.145	218.342	257.418	188.515	66.0912	62.4652	49.3516	79.0964	303.153	299.479	111.962	117.27	174.616	823.308	1039.71	889.173	757.129	776.115	313.449	251.053	247.491	214.646	224.429	336.678	196.431
X153	XANTHOSINE-MONOPHOSPHATE	904.203	712.757	733.258	853.235	728.694	662.729	1029.12	834.724	560.139	865.514	866.042	807.3	768.699	781.285	709.316	681.688	675.848	744.057	677.977	1107.23	721.282	891.373	607.251	854.106	624.235	637.165	582.455	667.037	581.114	669.645	653.21	920.308	736.699	536.39	501.645	391.81	567.794	449.923	384.634	459.314	398.926	347.037	312.473	279.595	437.48	237.828	49.9108	156.778
X154	S-HEXYL-GLUTATHIONE	3550.79	1604.37	2191.54	2345.64	909.261	797.502	973.667	2181.46	2170.81	1891.44	1674	2464.22	1531.16	1380.64	1551.63	1232.64	1188.58	1132.98	2546.82	1708.74	2048.36	1286.69	1647.61	1529.53	1041.01	1255.96	1584.96	2164.88	1891.34	894.537	728.447	2447.16	1784.97	1089.81	871.638	722.172	631.711	341.272	319.542	413.181	283.676	728.954	807.704	938.338	403.29	530.803	1019.78	936.044
X155	4-GUANIDINOBUTANOATE	662.178	681.722	660.29	797.09	340.427	519.734	638.77	599.926	411.697	873.876	652.924	707.806	764.133	647.282	730.985	672.306	813.676	885.262	939.867	784.531	656.919	895.268	813.856	675.604	694.518	712.893	738.931	1192.15	875.158	980.252	723.925	584.561	631.627	726.925	833.463	595.933	597.096	823.89	541.729	694.523	626.911	539.914	618.669	464.979	531.944	538.03	480.761	549.468
X156	GLUTATHIONE REDUCED	1933.21	1995.15	1818.37	2048.27	2190.13	1983.74	2042.53	2106.04	2274.42	2106.02	2265.17	2062.58	1881.12	2050.26	1948.79	2075.22	1737.46	2011.8	2028.27	2002.19	1937.2	2039.43	1820.42	1871.02	1863.37	1930.7	1968.6	1841.87	1950.9	2241.14	2439.99	1833.04	1980.45	1850.01	1960.45	1742	1852.62	1838.44	1750.59	1728.67	1709.38	1639.28	2036.49	1817.98	1813.33	1880.17	1775.67	1868.3
X157	INOSINE-MONOPHOSPHATE	1465.35	2132.7	2309.97	1708.52	2110.91	2218.52	1028.89	1570.04	1599.68	1522.44	1563.7	1548.95	1287.18	1429.66	1484.88	1544.29	1565.65	1409.89	2249.52	1651.07	2892.01	2421.64	2070.53	2370.09	1668.7	1710.11	1655.35	1812.96	1918.49	1463.99	1357.94	1191.93	892.826	1433.77	1493.58	1344.61	1744.05	1645.72	1688.19	1822.93	2810.65	2235.83	1905.12	2120.65	2422.35	2162.54	1880.95	3327.76
X158	THIAMINE PYROPHOSPHATE	3196.85	4048.6	4388.87	5911.63	5559.18	4733.48	5337.69	4419.35	3762.67	4291.56	3207.98	4470.17	4417.67	3994.81	5061.91	5192.75	5156.23	4715.56	3026.4	2797.88	2931.82	3265.39	2242.21	2908.87	3655.07	4076.79	4199.21	3264.46	3001.25	2621.61	2704.9	5977.16	6098.23	4441.1	3671.68	1337.98	3852.4	2217.35	1639.02	1703.55	2276.3	2050.69	1164.37	731.301	1698.4	1859.72	1780.05	1232.62
X159	UREIDOPROPIONATE	1600.77	1419.6	1668.18	2366.19	1555.5	1518.85	859.64	973.64	474.693	1018.4	1062.32	1123.1	823.154	788.952	878.087	732.915	720.328	649.473	1996.05	2382.4	1017.53	924.804	1100.81	922.57	773.373	714.951	927.392	1015.53	1021.53	762.358	780.329	787.859	796.545	736.072	629.309	571.222	865.809	873.238	1003.4	1168.26	902.509	1266.4	1049.54	756.732	1278.6	890.136	709.167	774.479
X160	RAFFINOSE	5501.01	6021.03	6590.05	8429.25	5364.03	7210.23	4220.92	3269.17	6235.01	4060.91	4278.67	5197.96	5990.75	4535.53	4996.44	6817.12	6849.98	6440.73	5290.59	6612.6	4239.63	3460.56	7063.84	5819.95	3249.72	1316.49	3606.18	6245.57	5379.3	3985.92	3182.32	4726.78	5351.08	4800.32	4768.63	5544.23	3193.71	4429.34	3124.6	3839.84	3693.58	4804.19	9715.98	8443.53	8199.06	7621.4	7382.56	3087.02
X161	CITRAMALATE	704.893	698.921	774.869	491.289	684.06	655.428	550.61	442.641	495.515	414.353	462.161	531.553	482.684	497.148	504.993	515.589	527.449	465.364	741.494	458.504	692.029	747.982	610.62	621.368	470.624	451.444	513.552	586.488	499.23	513.284	446.123	608.078	674.652	413.236	454.684	393.413	431.393	341.389	338.169	360.302	306.167	543.028	440.167	376.061	388.393	455.572	569.582	354.134
X162	STACHYOSE	22438.8	22642.7	21399.5	21808.6	11437.9	13703.8	9010.8	12919.2	28084.6	9039.37	10455	17370.1	18970.7	17851.6	16104.8	25437.5	17561.8	18289.1	4702.39	2420.01	5776.12	2923.35	12940.7	10690	1657.8	0	300.195	4937.15	10185.4	1812.99	2538.55	2951.64	3864.71	5333.85	2498.15	28270.9	17170.5	18157.3	12326.8	19112.8	15194.3	22857	39773.6	37063.5	18444.9	15343.4	30103.8	14428.2
X163	CORTISOL	603.647	71.9256	35.5121	299.767	53.1913	80.1888	73.6002	271.319	255.418	311.425	393.264	295.016	88.5386	128.536	90.188	273.471	267.318	352.049	789.331	45.7572	608.724	583.298	1072.22	973.482	580.766	705.559	686.347	559.369	488.902	276.275	302.79	278.251	241.726	380.913	376.628	364.07	647.692	385.414	321.779	278.449	323.253	460.677	413.161	429.666	567.894	334.922	273.597	45.7861
X164	GLUTARATE	992.285	981.247	996.722	1004.38	1022.59	1077.62	1028.8	1034.97	1044.55	1119.76	1105.12	1097.4	1113.82	1136.46	1125.02	1133.41	1137.48	1103.35	1104.29	1079.52	1089.33	1133.41	1148.92	1122.63	1089.16	1052.85	1102.18	1164.92	1160.18	1198.92	1217.16	1190.57	1174.84	1205.59	1148.67	1126.77	1109.3	964.889	901.155	1009.5	986.223	1003.67	1074.74	1016.7	1083.7	1036.19	1007.4	883.547
X165	CAFFEATE	121.478	129.38	227.982	121.012	153.309	104.694	90.0714	95.5721	84.3935	98.3076	86.4383	79.0583	67.9611	41.3872	118.593	33.4865	42.2022	155.87	107.148	103.651	133.048	128.345	146.159	181.189	84.0933	71.7254	178.854	97.1435	82.8045	122.693	202.522	150.861	113.921	267.662	123.945	122.677	337.957	432.204	243.685	167.127	171.369	189.766	155.473	465.359	232.256	161.835	127.787	229.784
X166	LUMICHROME	1693.09	1661.12	1489.53	1304	1593.85	1906.55	1317.05	1417.73	1193.44	1363.77	1796.66	1510.19	1522.56	1481.86	1407.75	981.965	1062.46	1002	1797.56	2486.05	1105.78	1303.4	1047.45	1082.94	830.689	985.921	910.411	1168.83	1081.69	902.152	870.689	1282.96	1315.9	976.581	1230.59	602.967	1465.51	1709.14	1524.7	1711.84	1452.8	1545.74	988.738	1041.75	1485.88	1246.86	1287.29	1458.52
X167	N-ACETYLPHENYLALANINE	952.481	340.163	117.045	279.994	437.795	349.452	829.713	320.046	269.179	430.78	406.893	375.518	513.79	513.555	580.194	728	846.991	821.894	317.78	448.684	497.302	369.768	432.663	562.825	567.169	464.333	422.445	426.393	298.296	340.822	426.631	295.647	370.183	374.444	377.239	92.613	239.535	382.75	324.395	329.878	271.36	194.889	317.127	182.264	429.145	430.083	236.67	239.643
X168	2-HYDROXYPHENYLACETATE	556.838	638.945	668.51	664.345	708.972	683.649	640.708	623.567	648.537	640.395	645.962	651.527	667.632	632.103	631.991	630.42	665.488	628.671	679.57	751.781	733.51	726.62	739.422	694.456	683.8	689.576	703.107	678.355	652.625	732.419	704.602	667.11	659.298	737.943	709.482	881.814	984.527	1059.44	1013.96	1027.73	1047.87	999.235	1131.34	1041.46	1087.17	1078.39	1008.49	909.607
X169	3-HYDROXYANTHRANILATE	1378.58	1376.54	1856.16	1979.76	1189.82	1162.26	1579.68	1342.58	1713.91	1410.28	1621.38	1610.3	1328.23	1464.08	1470.1	1212	1160.01	1152.55	1203.01	1648.11	1260.62	1604.34	1052.2	959.268	737.605	797.968	836.934	908.318	840.93	804.423	859.359	982.095	973.42	764.442	709.341	481.134	806.177	1037.37	822.932	937.197	948.113	478.319	550.881	648.016	707.546	609.124	701.856	691.587
X170	SEROTONIN	1508.76	1618.92	1522.87	1339.58	1405.93	1386.73	1108.75	1750.86	1255.91	1599.33	1621.13	1633.14	984.15	1078.08	946.017	1664.87	1734.35	1651.74	1636.21	1443.58	1499.38	1518.66	1437.42	1506.38	1441.72	1742.5	1596.98	1524.26	1360.58	1215.24	1112.63	1482.61	1410.64	1942.04	1787.95	1426.53	1274.09	784.373	720.145	684.479	637.297	455.202	718.863	738.303	825.752	826.786	805.582	442.126
X171	ETHYLMALONATE	137.976	149.91	83.1982	158.8	114.646	115.577	176.339	160.278	207.876	169.553	136.141	178.182	171.019	176.94	156.302	184.543	152.021	142.72	86.3633	82.8091	108.335	86.5046	104.934	102.833	137.617	128.187	126.991	86.2836	118.126	107.082	117.472	167.438	197.735	119.77	84.5896	190.159	273.018	271.735	204.839	208.094	220.589	276.25	230.529	238.812	192.587	200.679	236.551	154.082
X172	3-AMINO-4-HYDROXYBENZOATE	97.551	181.427	148.114	124.535	130.578	136.856	176.436	156.459	173.795	132.154	152.623	123.528	157.501	126.555	180.551	188.559	128.011	142.349	204.822	173.284	184.125	225.411	200.694	188.111	117.147	131.259	134.027	209.252	164.508	152.396	192.368	150.551	188.965	181.907	229.099	125.273	120.522	127.39	120.815	71.6629	100.992	154.328	100.57	180.408	142.604	87.0248	128.016	113.177
X173	ITACONATE	175.43	137.371	191.288	203.372	123.759	112.345	129.008	117.422	149.137	126.375	86.1296	136.062	171.409	76.0792	140.376	125.568	97.6005	131.257	70.3614	49.0825	99.1402	84.2699	99.7202	90.6508	93.73	46.2389	63.4949	40.7463	37.8812	51.2167	67.7015	87.0645	65.3151	72.2938	50.2145	103.229	124.762	132.316	146.908	140.87	140.031	142.426	179.754	219.518	118.854	117.284	160.158	151.46
X174	AZELATE	8894.29	12221.4	10137.7	9787.77	13109.7	12430.4	7260.69	6397.2	7135.46	6320.31	6765.08	10016.2	6209.94	6088.64	7031.11	5926.85	6173.15	6800.66	16583.3	10147.9	18829.3	18219.5	20324.6	19001.2	10491.6	7003.28	9195.6	10861.9	8328.4	12023.1	8994.9	9417.7	10142.3	10245.5	8620.54	12470.2	11186.4	10861.3	13172.9	10106.2	9478.55	13582.1	15185	16031.9	12790.9	10435.5	8783.08	7038.22
X175	2-METHYLGLUTARATE	235.16	407.15	253.345	238.593	304.437	311.644	316.665	201.314	272.471	176.776	240.428	180.705	268.628	197.502	317.007	287.969	224.455	258.955	628.899	442.713	608.96	406.978	699.72	590.255	547.291	532.006	557.728	405.643	488.805	361.109	258.243	549.031	569.796	307.246	286.138	737.346	632.945	524.309	505.616	524.61	671.29	749.199	791.64	670.948	577.877	602.797	703.648	421.163
X176	TRANS-CINNAMALDEHYDE	413.918	433.162	424.31	482.766	411.703	371.625	405.124	279.424	323.246	285.776	277.151	279.778	320.291	310.346	289.085	314.164	328.324	328.242	474.437	434.316	499.657	490.513	445.565	419.938	384.105	339.21	346.651	392.66	348.468	368.381	356.379	570.901	574.04	371.6	416.403	274.054	470.535	538.991	543.543	483.307	580.728	580.649	487.594	466.158	548.471	549.335	520.239	347.067
X177	SUBERATE	239.416	221.378	271.277	304.06	319.253	257.798	183.946	191.051	159.596	169.847	196.316	185.424	168.03	161.081	139.262	108.818	133.361	144.125	235.118	259.491	271.062	280.847	276.208	292.443	202.561	159.597	166.846	155.897	122.737	245.62	199.363	385.286	426.858	213.384	221.197	216.838	261.783	343.274	381.288	397.503	311.638	274.623	280.474	316.966	274.033	266.653	269.841	280.89
X178	N-ACETYLLEUCINE	1679.03	909.557	1581.22	1179.56	1186.12	1252.43	1473.49	935.933	1159.9	1035.5	1578.13	1664.17	1543.46	1764.14	1812.18	2786.74	2843.12	2727.73	1021.39	1175.8	1559.55	1687.36	1460.49	1634.26	1170.6	1224.08	1612.57	1742.48	1852.28	1037.3	1220.05	1197.4	1449.39	1257.93	1302.7	995.849	1069.1	1319.38	1257.99	1215.02	1049.19	1601.08	1332.33	1124.33	839.141	1454.71	2143.3	1070.01
X179	SALSOLINOL	2756.93	2756.56	2419.55	2831.41	2577.1	2836	2686.61	2682.26	2932.12	2553.65	2622.41	2621.74	2989.79	3085.51	3259.33	3357.38	3193.81	3239.88	2956.49	3100.56	3411.75	3084.03	2928.97	3139.68	3227.83	2790.74	3179.45	2948.57	3123.11	3453.3	3267.95	3150.59	2973.2	3217.95	2893.62	3054.85	2775.22	3512.9	3436.07	3664.41	3642.68	4054.2	4009.68	3696.02	3828.62	3693.71	3849.52	3767.8
X180	isohomovanilic acid	1169.59	745.795	1086.89	1029.66	1201.75	1176.18	91.6644	75.9643	94.4824	78.9619	81.1913	91.0808	89.018	55.8301	88.4582	61.1828	69.4073	74.444	327.694	470.964	226.045	195.792	310.819	247.759	39.3593	82.6298	75.2086	46.9848	62.3333	152.645	107.23	150.776	135.459	171.885	133.856	96.4999	166.67	288.387	250.264	250.538	252.043	87.1111	81.106	77.7447	86.006	81.3952	61.9412	60.3979
X181	PHENYLACETATE	144.475	102.233	62.0934	137.097	111.435	177.886	120.26	134.924	137.899	150.863	139.524	77.4909	75.6094	112.638	116.844	114.05	92.1155	100.47	148.593	197.273	247.727	230.255	205.97	157.747	219.264	135.798	232.674	188.865	174.344	103.763	86.481	269.964	270.15	83.8401	117.648	407.62	567.83	768.221	750.531	659.027	471.326	641.546	232.067	403.561	347.903	688.016	756.391	536.735
X182	DOCOSAHEXAENOATE	1070.14	372.472	742.618	634.983	39.4538	168.046	107.016	176.973	449.497	150.691	158.443	398.123	206.073	165.784	141.822	212.068	156.067	160.948	52.3713	24.0793	65.7667	0	0	33.7243	0	38.2044	58.6551	62.6245	123.451	0	0	38.8622	118.524	27.9111	0	178.982	607.306	517.618	697.44	611.208	703.668	1093.3	1118	1381.79	429.834	387.577	868.581	255.7
X183	XANTHOSINE	35229.1	31990	29091.7	33938.5	24956.8	21823.7	37332.9	32555.6	48017.8	34578.8	35678.5	45552.8	34767.5	35897.8	35650.7	38183.8	33812.2	28377.4	17105.4	12687	15676.3	15545.4	18485.8	15305.7	35426.4	26789.1	20044.7	14049	17994.3	10801.5	11965.9	40277.2	45765.9	15842.2	12399.1	50659.6	81159	105215	88964.3	90352.7	86215.9	81012.8	79614.4	66322.9	61801.3	54302.1	67121.4	50754.6
X184	XANTHURENIC ACID	234.237	251.28	311.983	283.057	316.387	308.461	343.884	246.619	202.798	245.85	276.528	250.506	255.829	259.431	241.179	234.4	242.79	218.679	443.562	356.67	451.331	512.737	521.778	577.939	238.227	267.039	314.336	417.074	371.793	514.527	510.477	340.111	364.748	297.618	292.236	127.463	554.641	969.668	894.837	882.495	868.419	558.418	299.35	232.872	351.094	333.355	230.911	450.021
X185	(S)-MALATE	21088.4	17306.1	18150.9	16292.5	15402.1	15364.9	15374.9	14429.9	16776.8	14730.1	15776.3	17526.3	14212	14936.2	14216.8	16022	15879.2	13723.3	16011.6	10359.6	15098.9	15540.8	13152.6	12561.6	14651.4	14613.6	17569.4	14072.7	14150.3	11218.7	11870.7	16930.6	18117.9	12719.6	11200.8	9415.51	13677.3	14605.7	13241.3	13768	14110.5	15149	13106.6	11859.5	12063.7	13519	16393.9	10371.5
X186	2-(8-hydroxyoctyl)-6-methoxybenzoic acid	887.771	988.608	850.333	945.745	689.429	715.095	1662.02	1077.09	943.682	1228.65	1390.83	1234.56	1220.62	1057.49	1029.88	1373.84	1442.33	1478.75	1042.68	1033.54	1025.44	1149.96	921.567	978.806	1497.46	2125.84	2044.09	2259.52	1923.52	1287.45	1174.65	2529.3	2804.22	1318.35	1356.66	1571.12	1925.41	2016.87	1874.63	1857.24	1867.82	3438.87	1912.13	2055.63	5015.61	5100.28	4505.82	1188.87
X187	2-{2-[5-(Ethoxycarbonyl)-2-morpholinoanilino]-2-oxoethoxy}acetic acid	643.551	2064.19	618.44	675.958	2539.87	1803.83	4518.27	2794.47	545.406	3316.77	1945.51	874.332	1913.86	2862.55	3161.06	1891.58	2330.31	1744.94	2214.89	1385.81	2026.03	1865.4	2280.62	1837.14	1030.71	776.088	2164.4	1638.01	1623.38	1555.2	1562.86	1447.46	1727.13	1378.47	1063.87	636.963	149.509	120.721	173.821	201.275	169.359	1181.08	654.728	740.625	251.456	413.877	220.68	719.233
X188	2-Methylglutaric acid	766.643	1078.2	886.271	1073.33	842.165	744.939	487.367	531.043	685.226	543.127	542.75	514.348	440.302	479.604	616.696	514.938	507.862	485.666	1011.09	818.064	1091.21	1023.32	911.321	892.959	987.298	1100.16	1242.39	760.072	648.337	961.944	882.323	1222.59	1260.98	864.354	752.218	1429.1	1625.75	1823.99	1947.84	1646.97	1748.33	949.752	1465.92	1377.52	1097.16	1120.17	1061.29	808.133
X189	2-METHYLPROPANOATE	205.277	201.045	260.893	771.304	366.327	351.232	419.667	294.51	478.414	286.11	346.332	307.378	374.782	388.024	392.967	340.14	327.386	303.745	359.394	476.223	379.1	435.636	570.994	551.675	377.208	355.618	372.452	393.441	376.563	382.061	377.884	748.183	822.437	349.343	334.934	202.693	318.654	345.456	304.983	314.399	305.742	420.032	386.523	362.824	300.734	311.547	318.042	245.166
X190	3-(4-HYDROXYPHENYL)LACTATE	7635.97	6107.64	7899.93	8018.52	5821.67	5440.02	11745.9	7376.47	8435.92	7449.81	8922.02	7853.83	7575.84	7707.23	7568.07	8312.79	8465.08	8020.46	9286.65	11589.2	8741.41	10695	9905.34	9777.97	8639.6	9168.28	9057.69	13416.7	13206	10790.1	11913	11029.2	11644	9332.84	9319.75	7096.57	9930.04	10309.5	9655.94	9560.6	9790.83	12425.6	9043.47	7783.83	9988.17	10346.8	10134.5	7685.48
X191	3,4-DIHYDROXYBENZOATE	1447.08	3493.3	7693.24	4014.8	4186.17	3846.02	103.785	93.4547	33.2563	93.5506	124.043	106.082	47.2349	34.8394	35.2517	50.2204	53.0203	41.2145	1142.98	2264.54	367.679	391.045	406.759	363.487	89.2099	95.3906	99.1693	114.426	92.5817	137.884	130.161	148.119	153.08	121.351	127.677	22.5983	115.744	135.352	114.034	118.29	122.989	21.0783	51.5254	63.3193	37.1388	19.4096	21.788	38.2091
X192	3-HYDROXY-3-METHYLGLUTARATE	5377.93	3909.66	4694.2	4965.13	4961.43	5081.91	5300.61	4488.86	5077.42	4679.82	5269.7	5674.76	8043.29	7910.96	8184.12	8516.59	8454.35	8236.92	7079.38	6081.36	8326.6	8615.81	8577.56	8401.23	6981.77	7118.38	7938.42	7202.62	7762.57	6763.8	7068.63	7573.64	7543.07	7142.13	7090.87	9142.07	10007.4	9908.57	9331.68	9379.55	9348.11	7038.78	8872.32	9177.77	8563.93	8561.83	9398.49	7467.23
X193	3-Hydroxy-3-methylglutaric acid	4448.19	4949.32	4522.28	3641.58	5650.62	5783.26	7091.2	6520.12	4894.01	6251.09	6836.99	5753.13	6636.66	7445.19	7740.72	6135.47	5649.38	6091.43	7866.5	7609.97	7160.7	7070.7	6512.43	6161.77	5852.27	7028.58	7079.6	9283.57	7294.84	8709	8457.39	8818.44	8955.09	8627.6	8469.85	4443.42	3496.69	4407.3	3877.27	4236.79	3659.44	7405.08	7062.79	6201.2	5839.56	5323.55	3568.17	4981.07
X194	3-Indoxyl sulfate	38744.5	84523.7	243405	103504	59816.8	59234	65467.5	70392.1	69642.9	71439.1	81113.6	70816.6	93126	89626.4	89683.5	67695.2	68112.9	63962.7	99749.4	48677	67077.8	77372.4	162284	156624	46556	51767.7	53743.7	59649.3	55254.4	55846.9	57584.3	85282.3	91989.4	104039	100875	38253.2	66517.2	73855.3	65458.6	66378.8	65604.6	30653.1	66117.9	66582.2	71965.2	65474.4	64995.2	40244.3
X195	4-(4-Ethoxyphenyl)-4-oxobutanoic acid	648.907	686.751	616.659	652.548	636.704	725.869	717.153	728.419	741.49	694.844	647.666	640.066	749.521	693.21	739.08	741.222	765.113	734.648	747.606	732.134	759.531	754.202	723.155	732.935	760.695	727.821	755.955	760.917	776.271	759.509	794.138	749.936	776.644	777.071	732.132	875.919	827.833	803.053	805.721	790.773	769.053	918.292	879.948	962.065	849.406	881.473	871.19	851.656
X196	4-Dodecylbenzenesulfonate	34694.6	69945.5	102474	93271.2	50076.9	101553	35209.9	98458.8	102147	79678.2	55771.9	70819.1	48457.2	85756.1	93120	150866	79140.4	129218	62045.2	119893	117886	139576	166640	129905	174842	158593	167191	121255	131702	80666.2	236356	168937	160708	147875	129650	88113.7	255285	126466	181178	155502	167132	79476.5	189933	253056	323992	143344	230789	91657.9
X197	4-HDoHE; LC-ESI-QIT; MS2; CE	60134.5	16986.8	33638.7	18459.4	5468.3	5750.43	6091.98	9540.94	25262.2	12703.8	12608.6	26370	15427.8	13307.3	16798.3	22821.4	17505	17956.3	4412.85	3600.33	8251.45	6942.97	6958.01	4941.76	4935.08	4260.54	5193.1	5014.28	8545.86	2118.58	2782.89	9047.33	10026.8	3909.47	3728.18	31203.6	52822.5	53511.4	45672.5	48582.4	48055.7	61173.9	68096.6	74594.6	25123	37601.3	55351.9	22485.5
X198	4-HYDROXYBENZOATE	1611.72	2550.79	5170.29	1992.04	2975.76	2881.19	1359.53	2089.79	1342.85	1813.12	1334.89	1586.12	1145.3	1019.6	1198.34	1183.66	1158.54	1165.27	2206	2315.23	2024.87	2073.32	2046.41	1991.92	1593.57	1543.62	1705.33	1337.31	1263.2	1475.08	1659.37	1952.14	1870.55	1806.54	1827.8	1842.25	1793.7	1679.25	1683.11	1807.08	1692.73	1902.15	2146.07	2018.42	1539.45	1479.41	1415.75	1662.84
X199	4-Pyridoxic acid	1922.12	2023.73	1288.97	1459.69	1554.35	1520.45	758.542	1118.79	574.782	1126.94	1406.2	1209.96	561.949	599.81	639.911	514.922	553.234	503.504	2216.92	2920.98	1495.52	1699.06	1208.6	1221.26	1004.04	1159.18	1241.74	502.634	479.925	632.258	661.852	416.101	419.785	653.241	622.618	309.877	1699.95	1936.29	1738.4	1775.81	1914.21	758.937	625.476	516.176	721.191	794.1	775.387	450.751
X200	5-Aminopentanoic acid	101.035	155.899	113.215	125.274	219.171	193.975	389.342	295.386	99.56	317.501	233.06	170.362	243.85	315.418	361.247	230.655	246.756	218.092	166.732	145.509	191.665	191.384	231.787	207.29	174.843	175.074	239.378	287.048	292.227	269.281	270.953	190.078	203.065	225.166	209.274	110.802	107.503	139.512	124.992	127.796	124.691	145.727	122.487	137.945	131.338	138.74	122.58	145.293
X201	5-HEPE; LC-ESI-QIT; MS2; CE	86721	30879.1	59188.9	71560.6	16700	17889.9	9728.75	13823.9	31587.4	17504	19328.3	37505.9	17827.4	18529.9	19153.5	19956.3	18224.6	19943.6	14423.1	11856.5	23357.8	20050.9	31394.8	25035.1	10480	12163.3	11726.3	16708.9	23140.4	7080.55	8651.51	19710.9	25294.2	8660.2	8600.05	28662.6	74222.2	65988.1	65236	64514.2	66795.9	43559.6	53152.1	65946.7	24264.5	30287.4	56370.8	29222.6
X202	5'-METHYLTHIOADENOSINE	191.096	127.144	181.994	396.619	320.159	248.299	401.375	218.849	116.678	295.496	235.06	175.59	261.514	255.409	337.726	479.146	494.093	394.785	368.93	358.114	397.218	448.303	371.736	363.808	328.758	302.577	395.845	179.747	221.28	205.657	190.883	259.596	303.757	221.754	223.506	69.9483	79.3662	134.559	128.083	92.1791	117.248	85.5618	115.762	102.919	89.8412	90.3071	63.4954	77.244
X203	5-OXO-D-PROLINE	518.112	317.453	623.703	462.128	414.366	375.659	268.608	201.783	199.498	210.624	206.927	200.325	212.304	240.093	278.143	244.438	240.654	217.549	366.189	567.696	201.251	265.585	269.466	241.467	196.866	181.199	233.32	227.729	233.056	244.516	204.04	152.373	149.457	179.357	169.23	144.071	191.58	204.745	169.955	181.846	223.813	71.2411	227.395	238.254	235.672	147.087	146.192	121.402
X204	6alpha-Prostaglandin I1	39654.7	16397.4	37536.8	28263	11398.1	12803.5	5900.11	19724.5	28998.1	19797.6	22141.1	33172.3	11171.9	11406.8	11869.5	20803.4	22759	21929.7	14391.8	8660.27	19323.3	17775.5	15247.2	15250.6	10002.2	12530.7	16258.1	16494.4	18613.7	5728.46	6118.12	18324	20362.8	11991.3	11463.1	16501.9	23691.3	21933.5	21746.6	23797.1	23875	17079.5	28765.9	34551.6	11691	13798.7	24196.4	8516.54
X205	6-CARBOXYHEXANOATE	1575.1	1716.53	1420.56	1916.67	1683.18	1620.02	348.786	320.254	347.472	359.618	333.479	323.392	256.557	241.063	374.294	255.227	255.363	261.597	1243.7	1081.48	1027.86	1052.17	1078.72	999.015	576.669	374.827	417.84	435.823	322.254	709.429	746.882	800.394	705.134	618.058	547.37	635.616	1162.78	1227.76	1228.09	1172.41	1175.41	638.995	877.361	800.277	619.92	683.957	561.325	425.17
X206	6-Phenoxynicotinic acid	17.37	173.884	149.13	51.6313	194.468	167.969	244.771	159.535	121.577	169.892	186.103	172.629	267.428	242.217	247.988	450.981	458.433	458.847	896.752	1001.26	479.354	504.755	635.193	637.732	401.114	442.413	436.121	1138.28	1214.15	676.412	705.181	412.542	418.442	1130.42	1016.57	591.353	271.936	339.618	284.432	323.221	228.013	368.603	860.651	1157.91	661.577	602.817	648.247	298.254
X207	7-HDoHE; LC-ESI-QIT; MS2; CE	41.6129	53.3688	77.074	71.0593	42.601	43.671	64.8898	70.4904	45.5568	94.3985	91.7127	55.1812	60.0894	89.1039	66.6744	56.3186	89.3197	62.8882	160.597	92.5299	69.902	130.33	73.0692	42.6837	82.2548	85.6195	123.783	101.428	114.068	72.9196	116.476	190.827	214.826	140.765	130.881	109.773	299.139	342.404	247.852	270.916	236.663	679.087	273.763	279.808	281.244	403.562	217.878	266.376
X208	9-HODE; LC-ESI-QIT; MS2; CE	761.066	916.444	1191.21	1486.86	284.843	258.893	610.531	721.257	728.82	712.539	744.276	663.171	421.708	450.591	508.121	662.424	619.365	564.503	1075.51	912.804	1006.59	981.61	790.087	695.985	592.633	599.29	610.225	660.312	724.101	709.101	769.436	1656.28	1589.64	617.751	577.283	311.136	1946.57	2059.08	1671.65	1557.96	1661.41	2139.29	1611.73	1521.95	1592.74	1501.63	1252.5	566.837
X209	9-HPODE; LC-ESI-QIT; MS2; CE	2241.63	1746.68	2270.43	2540.2	1166.18	1273.08	1846.4	1348.49	1812.16	1402.82	1613.74	1742.97	1120.98	1294.89	1534.12	1177.12	1155.15	1163.49	2090.92	2535.05	2322.12	2756.65	1713.76	1698.42	1724.45	1959.18	2230.18	956.977	1024.91	1259.92	1269.77	3615.89	3625.44	1291.93	1234.82	1403.69	3399.38	4108.68	3513.12	3521.07	3317.7	4702.3	2082.95	1657.83	2218.38	2486.61	2531.22	2111.25
X210	10-HYDROXYDECANOATE	2439.17	3460.34	7761.64	8408.92	2760.71	2706.34	3980.4	3502	3308.83	3476.76	4385.23	3936.89	5319.14	5086.63	4871.05	6707.02	7125.48	6468.65	5669.56	9686.53	8734.05	10238.6	7059.01	7490.19	5233.98	4817.43	4994.44	5706.68	6328.59	8928.06	10135.6	21881.3	23784.9	8940.99	10042.9	3702.5	7743.37	8680.7	8045.61	7850	7616.42	7109.99	7110.29	6658.84	6410.11	6641.33	7915.78	7728.02
X211	11,12-EET; LC-ESI-QIT; MS2; CE	223.285	71.5574	108.458	66.7777	24.9303	41.7506	21.7192	92.9784	118.515	127.121	106.821	147.267	61.0046	38.175	33.6732	6.46737	19.4132	28.6349	76.6784	29.0752	155.722	127.392	123.696	55.7342	60.8015	82.2955	34.1239	64.0096	102.303	57.9552	42.2415	174.736	209.295	66.3023	38.4826	94.3056	33.3944	73.7019	25.2737	59.7238	44.0211	672.509	257.334	194.869	79.7425	68.8133	104.406	19.0884
X212	12,13-EODE; LC-ESI-QIT; MS2; CE	41655.2	27468.6	32727.2	28366.3	12340.1	11104.8	7606.97	11182.1	19113.9	13231.3	13191.4	21637.8	9139.27	9240.18	9261.4	14508.5	14653.3	14005.9	31040	28513.2	33727.4	36344.7	28962.5	26684.2	11764.1	11767.1	11421.8	14254.8	15142.1	14293.9	13116.2	28911.2	25825.9	13879	13079.6	18591.9	54819.5	52457.7	47646.7	55743.7	46206.7	24680.7	44780.1	52105	32253.2	41790.3	57975.5	13299.1
X213	12-HEPE; LC-ESI-QIT; MS2; CE	229.375	0	30.0305	0	10.8447	25.5677	14.2525	128.631	155.032	111.635	148.106	107.824	43.2114	53.669	57.5527	76.7434	92.7944	53.0356	0	0	100.331	100.556	133.889	116.051	66.0802	108.709	102.654	292.026	231.899	26.1523	40.3344	1567.5	1628.81	107.06	98.866	260.233	66.2969	91.6057	50.401	42.0026	71.0729	377.477	207.015	207.741	392.586	394.531	372.316	165.765
X214	16-Hydroxyhexadecanoic acid	3948.03	8811.43	4581.63	5615	4961.69	4746.04	5100.78	5123.83	4525.26	5530.35	5843.36	5662.3	4546.03	4719.01	4861.77	5035.21	5322.64	5361.71	6918.97	7762.52	5297.21	5897.84	6138.69	5740.64	9517.18	10528.7	9401.62	9615.14	8879.91	10782.9	9950.91	13418.9	12285	9806.24	9750.16	6101.82	11451.6	11936.1	11065.6	10959.3	11583	11254.5	10371	10065.1	12288.1	14110.4	13660	9282.71
X215	ALPHA-KETOGLUTARIC ACID	20742	16767.4	20658.6	16658.9	16333.4	14939.6	11724.7	11817.9	16312.7	12039.8	13615.8	14543.6	15557.3	15122.8	15845.7	12067.6	10954	10104.7	13643.5	11901.3	17439.1	20267.1	16111.5	14685	16223.5	17071.5	16006.7	18145.9	16347.6	13765.1	13603.1	21347.3	22558.5	14211.5	13330.1	14759.5	23471	23717.1	22091.1	22455.2	22663.4	32406.8	29587.4	28779.9	18792.6	19271.1	23029.4	20403.7
X216	Arachidonic acid	248.979	11924.7	17769	25311.2	22480.3	18621.7	131.595	39558.6	38483.6	29150.9	37924.3	36977.2	270.174	43592.9	46665.7	45399.9	34136.1	34726	357.645	42740.8	36095.5	40142.5	36787	31251.2	45716	33050.8	32679.2	39944.3	50007.2	366.987	44000.6	44726.7	66193	67106.1	49452.9	491.725	33366.6	41655.4	52112.2	36829.2	42105.5	472.215	118119	76424.2	51733.4	68742.3	65206.6	486.094
X217	AZELAIC ACID	7637.59	10153.7	8236.98	7986.06	10672.7	9555.61	5112.72	4678.71	4644.89	5010	4644.55	8325.6	4369.52	4032.16	5990.98	4237.27	4083.67	4541.51	14943.2	7343.91	17207.4	16336.3	19204.8	17307.8	9098.16	4967.94	6527.44	8908.79	6153.05	9518.98	8157.96	5979.65	6541.82	7706.67	6416.86	11548.4	8016.64	7762.01	9948.14	8121.17	7377.27	12191.5	13323.1	12958.2	11198.3	8794.83	6165.25	5949.49
X218	Cholic acid	127649	178742	180795	86524.6	188800	166038	77461.2	16271.9	1227.44	14359.1	16246.8	14812.3	1611.29	1336.31	1257.75	54336.4	50766.8	50566.9	191512	232074	29066.5	30389.8	167970	170651	78122.2	100735	100203	46709.5	40247.9	600.404	552.528	6732.98	6990.2	1134.56	1105.04	1242.81	67638.8	81962.2	56674	65608.3	68278.5	151594	57471.2	37278.2	180504	181750	165303	4512.01
X219	cis-Aconitic acid	1130.49	1358.45	1450.18	2331.4	1746.68	1540.56	1959.08	1766.52	1471.19	1609.77	1456.98	1692.44	1631.25	1563.6	1788.69	1917.44	1992.42	1766.33	1511.24	1651.98	1994.27	2264.21	1390.34	1586.35	2136.67	2253.13	2346.06	1947.45	2048.8	1637.64	2011.5	3546.18	3594.04	2472.2	2339.89	801.668	1695.48	1913.88	1637.63	1560.54	1688.44	1566.66	1118.72	1018.22	1716.1	1518.37	1570.34	1237.78
X220	CITRATE	50086.9	62799.6	57337.1	84472	69080.1	62384.2	74785.6	72715.4	70325.4	74209.6	57854.1	71696.6	63542.2	57042.3	72266.3	71815.8	74478.4	68020.1	44922.6	38658.2	39109.8	48367.2	38286.5	38615.2	60553.5	51824.9	49836.4	42423.4	51160.1	44675.2	44939.8	85687.2	83715.2	61722.4	52079.9	31383.5	65365.5	69628.6	58161.4	61991.1	77744.8	52349.9	42760.6	38842.8	67705.6	53318.4	59336.6	45922.9
X221	D-(-)-Lyxose	3583.49	2474.68	2834.39	1873.69	2872.47	2918.83	1425.51	1286.84	1488.97	1372.08	1430.46	1445.41	1385.84	1437.21	1355.61	1412.02	1226.56	1268.56	1797.6	2198.36	1575.83	1545.13	1673.61	1486.58	1158.48	1359.81	1387.85	1444.05	1252.28	36311.5	36623.3	39969.2	40112.2	34775.9	34150.4	1840.41	2250.69	2249.77	2143.18	2162.1	1919.2	2172.24	2262.14	2034.12	1445.56	1443.37	1583.92	1364.36
X222	D-(+)-Mannose	30944.8	29462.6	30742.6	30459.1	30317.4	31769.1	29383.2	29492.5	27170.3	28279.8	28518.4	29547.6	28786.2	29928.2	30633	31268	29760.3	30065.4	29365.5	29988.5	28079.5	29509.2	29248.7	29386.3	27805.4	28260.3	31446.6	28506.2	28044.2	26458.2	28497	28823.6	31033.7	28720.9	29222.9	27613.8	30576.6	30529	31013.8	30062.8	28153.3	28995.2	28157.1	28642.5	28275.3	29196.5	30818.7	28572
X223	D-alpha-Hydroxyglutaric acid	2056.03	2004.68	2458.6	1921.23	2282.43	2170.26	1979.84	1451.87	1551.55	1512.36	1720.09	1757.3	1713.19	1658.5	1816.35	1764.66	1685.32	1632.63	2422.83	1976.22	2411.88	2843.7	2144.25	1999.55	1684.1	1802.84	1999.65	2104.62	2115.95	1978.2	2069.2	2731.52	3006.69	2065.19	1999.3	1290.81	1833.7	1962.24	1730.65	1789.17	1730.78	2323.83	1767.81	1702.54	1993.24	2139.59	2363.35	1562.68
X224	Deoxycholic acid	25194.2	24111.1	20913	23658.7	19529.5	17491.3	1665.86	5875.38	2549.36	6925.83	7055.4	6265.47	5418.49	4793.69	5123.51	3636.4	3607.74	3455.06	53829.8	44879.2	20882.2	23829	80770.6	77666.2	12321.1	14953.7	12943.6	4218.94	4593.93	4681.36	4746.1	11897.6	11391.3	7133.85	6852.67	9859.15	28101.9	34267.2	28256.5	25940.9	24581.9	7258.47	11535	10701.3	68660.1	72127.4	65302	7870.86
X225	DEOXYURIDINE	18673.1	16578.2	19218.9	23916.3	20759.1	21830.6	14414.8	12896	13152.7	11595.1	8531.89	8455.11	9216.55	8684.9	8538.55	11208.1	10051.1	8445.63	12269.5	14386.3	10732.9	10073.4	11513.8	9031.02	6442.61	6826.42	7657.97	7377.46	6278.67	6800.03	5918.95	8742.62	8114.7	6863.21	5515.97	8653.64	16669.9	17740.9	15571.8	16541.2	12751.8	27766.2	11414.4	9397.41	11873.1	11069.1	8821.77	9750.08
X226	DL-3,4-Dihydroxymandelic acid	122.399	246.873	529.457	158.277	278.074	275.361	95.8571	176.783	90.1448	139.492	92.3787	105.956	60.0103	52.0701	56.3181	66.3097	64.535	43.7251	159.211	179.57	137.23	124.312	137.1	102.674	94.3502	79.0869	98.624	64.7476	54.2776	78.5945	89.8529	120.432	108.325	83.5386	96.9283	114.758	100.776	92.9222	101.873	108.238	90.26	123.676	141.186	149.29	75.7308	67.3509	64.634	84.7949
X227	DL-alpha-Aminosuberic acid	345.608	360.921	391.773	371.759	435.073	388.078	212.94	143.994	132.514	153.224	183.132	142.487	141.039	159.225	153.227	133.517	138.544	122.662	345.971	419.815	118.824	158.656	182.554	140.071	103.451	100.977	94.5654	202.468	214.992	219.023	224.48	137.275	123.117	194.541	193.717	95.1958	411.743	466.127	394.099	416.471	380.909	83.1034	151.075	168.619	131.104	118.228	103.479	98.2823
X228	DL-Glyceric acid	416.507	447.461	403.658	427.74	459.162	439.527	466.088	464.948	446.525	458.759	434.608	436.652	487.647	476.722	503.054	458.186	454.912	440.11	493.274	516.316	496.698	510.418	457.634	469.167	488.841	484.682	489.21	487.562	510.469	537.703	519.778	528.943	527.318	524.806	526.053	536.181	535.398	486.329	496.57	469.119	487.462	502.475	503.252	503.125	491.033	483.761	471.699	535.455
X229	Dodecanedioic acid	1064.16	939.829	1967.42	985.233	1198.33	1075.92	1278.52	218.113	249.132	205.671	223.677	237.371	443.288	458.676	467.727	195.287	203.217	167.98	1978.69	3303.32	1293.05	1591.96	743.143	726.986	203.896	195.783	195.564	163.525	172.416	311.038	371.373	365.973	394.001	247.525	225.635	181.853	704.606	771.314	679.908	624.48	667.463	323.537	248.952	202.982	270.178	288.342	264.849	180.74
X230	Dodecyl sulfate	25791.2	29111.9	31309.1	21081.9	32877.1	36380.9	30192.3	36900.5	31769.5	31124.4	26154.4	22776.4	25122	20817.4	23339.4	23871.6	24213.1	24205	23050.2	24822.6	21832.3	27008.5	23354.2	25973.1	26970.4	22417.7	23774.2	24235.1	19605	20077.5	23174.1	22352.7	21035.7	15444.7	14131.2	31371	19791.4	21143.7	28423.9	20250.1	23718.8	35008.8	41610.8	50134.6	22714.1	26997.5	31357.9	24258.4
X231	Epicatechin	1267.22	1496.48	1596.29	1343.21	1683.18	1577.52	3379.13	2205.15	1325.23	2161.92	2245.39	2135.39	2715.41	2490.46	2982.64	2643.87	2443.76	2360.2	2705.68	2153.65	1978.6	2209.79	2252.43	1932.92	2396.57	2544.52	2369.01	3626.85	3555.19	3397.79	3038.24	1360.51	1302.45	2719.65	2769.85	1159.9	1466.32	1578.89	1289.63	1295.06	1386.62	1068.2	1569.52	1705.25	1807.66	1599.52	1590.44	1485.11
X232	Flavin mononucleotide (FMN)	659.93	509.978	1056.13	927.169	3087.54	2981.95	0	0	0	0	0	0	0	0	0	0	0	0	157.633	200.363	122.225	124.647	624.534	566.956	0	0	0	0	0	0	0	0	0	0	0	0	519.444	601.06	487.374	511.726	488.064	0	0	0	0	0	0	0
X233	FUMARATE	260.853	211.187	286.988	228.556	190.503	197.786	249.168	177.334	218.003	169.343	211.801	259.556	213.507	210.269	208.552	281.885	243.448	229.212	396.853	283.725	358.822	367.227	309.273	274.691	316.551	371.783	412.416	371.012	331.944	282.944	271.466	338.433	367.755	264.166	267.196	193.04	284.489	277.327	258.803	270.357	273.271	332.952	311.472	271.557	245.097	292.853	335.635	234.303
X234	GLYCERALDEHYDE	48722.1	58363.5	54007.6	41865.7	59792.9	60670.1	79052.4	75249	60058	71139.2	79899.3	72438.9	71230.5	79455	80696.5	64543.1	57351	61756.7	90939.5	85078.4	75621.4	78134.1	63394.1	54656.3	59103.4	74437.5	80736.1	92271.5	73463.4	108843	98611.4	115514	121466	103668	102490	43673.2	56773.4	58104.4	55974.3	55319.6	49665.8	90896.3	72930	64481	67454.9	69901.1	54078.6	68814.7
X235	Haloxyfop	1037.89	927.692	1015.14	1297.58	1002.17	967.734	136.485	434.56	560.366	544.914	543.016	501.151	308.674	295.767	333.086	1162.43	1222.08	1161.22	11438.7	1874.08	17193	20780.7	18800.4	18162.2	149.098	171.501	181.205	161.96	143.986	109.449	76.3462	212.906	191.271	284.223	282.301	194.208	19475.3	21161.4	17857.7	19023.9	18543.9	108.661	72.9643	129.111	109.315	103.449	127.252	25.6064
X236	Hexadecanedioic acid	6142.48	14252.2	9848.32	11791.6	7418.41	6486.54	4368.19	4254.22	4582.44	5270.36	5701.78	5796.48	3698.08	4087.33	4258.33	3702.57	4232.02	3999.69	13454.7	14939.6	8588.49	9630.58	11406.3	10846.6	7951.14	10077	8782.69	9668.48	9871.88	7383.76	8099.9	12223	13953.3	7307.8	7189.8	5124.74	13372.4	14715.1	14977.9	13541.6	14027.8	9063.93	8234.43	8828.98	13732.6	12123.8	12958.9	4999.88
X237	Hydrochlorothiazide	259.029	657.594	1620.12	786.605	491.436	434.431	506.732	564.258	531.204	555.638	607.76	536.885	747.041	695.426	704.327	526.806	517.722	461.453	738.306	388.07	531.493	584.635	1069.9	1098.65	324.195	372.935	366.744	427.188	384.197	426.392	408.662	654.647	591.075	765.315	753.922	294.473	474.329	542.056	460.999	451.971	488.843	212.198	486.172	448.908	505.027	456.282	457.16	315.736
X238	Indole-3-acetaldehyde	7682.44	10560.6	11578	4628.49	13320.2	12880.2	2543.93	2003.67	1492.41	2241.06	2550.65	2383.56	2033.74	2183.11	2156.17	1668.51	2239.08	1985.53	5963.84	10219.1	2046.99	2355.18	2434.3	2514.67	1363.6	1597.82	1534.25	2551.53	2525.09	2186.51	2307.81	2414.96	2412.28	2280.56	2119.74	1828.37	2208.77	2418.72	2247.17	2210.28	2127.64	2130.7	2895	2859.43	2702.28	2744.45	2904.95	1521.8
X239	Indole-3-acrylic acid	2254.2	5357.61	11831.6	9011.57	17607	17802.4	751.686	332.42	249.849	324.119	405.517	324.878	333.652	307.614	294.8	961.76	1007.88	971.139	10683	22235.2	2025.44	2121.3	1098.05	1102.13	181.736	128.518	129.905	368.029	331.31	366.143	346.459	549.3	625.35	1092.18	1060.63	218.077	481.53	515.084	439.57	456.103	450.956	264.595	501.729	562.655	458.01	418.596	407.209	71.6931
X240	L-(-)-3-Phenyllactic acid	8377.72	5555.04	12192.7	2474.48	10747.9	10345.1	922.773	1251.83	800.826	1230.64	1434.08	1329.03	761.862	762.07	773.444	825.532	798.156	801.831	2468.01	4141.79	1235.1	1381.37	1397.47	1393.84	1001.18	1040.84	1035.83	1640.2	1608.65	13061.7	13340.1	14621.9	14331.1	12434.9	11886.4	863.639	1666.5	1740.45	1661.09	1623.58	1539.09	1687.07	1316.57	1190.9	1370.89	1332.26	1483.39	1145.19
X241	L-2-Aminoadipic acid	460.037	415.441	475.814	427.846	425.884	405.926	709.08	633.737	604.456	626.943	728.235	593.602	514.711	564.224	618.014	657.858	664.323	624.408	693.72	550.075	782.992	874.151	620.829	477.859	760.391	945.908	1170.71	902.834	823.125	567.192	461.034	583.467	624.974	495.41	482.758	378.278	609.157	625.465	565.464	589.425	564.729	498.567	472.847	428.18	468.488	518.089	475.769	411.069
X242	L-Ascorbic acid 2-sulfate	10936.6	17707	15255.1	14777.3	18752.9	18015.7	23233	20003.2	16349.8	20404.6	22226.8	21132.4	17975	17261.4	19721.6	14744.9	14526.7	14183.2	23657.4	18224.5	19373.6	20500.5	20998.5	19859.2	17161.9	17236.3	20097.7	20514.7	19108	18773.1	19727.4	21292.6	22328.9	20728.7	19867	10169.7	21778.8	23320.5	21090.5	20527	22690.1	22596.7	17213.2	15419.3	18420.8	20246.1	20277.8	18226.5
X243	L-Cysteine-S-sulfate	735.523	340.743	379.432	136.864	431.051	334.217	92.7284	260.637	78.1805	127.528	377.456	236.058	359.308	238.676	334.478	49.4593	90.6825	49.3228	280.781	144.462	192.644	156.628	310.457	229.517	556.988	500.829	349.556	422.75	226.623	284.911	316.658	226.674	227.788	423.94	437.55	587.433	1554.33	889.105	1423.15	879.586	1058.15	572.185	439.901	683.8	269.047	493.35	538.915	595.174
X244	L-Glutathione (oxidized form)	12607.6	540.834	410.041	772.879	700.349	456.982	606.158	1608.39	2336.96	1836.29	2029.1	1753.71	1029.78	707.586	1330.94	771.026	1066.03	477.224	1526.44	1007.24	1236.08	2333.82	1011.31	1124.36	1371.75	1117.08	1344.43	568.783	292.764	951.131	465.91	1274.11	1024.45	620.657	459.503	1249.97	1689.07	1070.91	2013.37	577.972	5052.53	796.401	256.165	1064.35	812.277	1500.85	1050.62	6523.41
X245	L-Iditol	5569.63	4310.76	6439.89	7119.96	7291.4	7045.43	2734.95	4115.42	3538.51	3410.8	4055.88	7127.12	2907.87	3610.37	3048.67	5631.32	4991.84	5161.42	3388.66	5506.1	2163.96	1814.73	3004.04	3134.75	1638.56	2181.34	2448.62	1879.13	2401.76	1085.76	1486.09	1626.19	2005.57	1990.9	1177.34	3110.61	4087.23	3370.99	3032.02	3169.71	3036.73	2183.21	3861.87	3502.94	3051.95	3749.73	5346.58	1757.43
X246	L-Tyrosine	5528.33	5243.38	6462.64	6494.6	5004.12	5164.09	8631.93	5784.47	4979.66	5806.86	6453.66	6090.63	6273.23	6663.36	6349.96	6842.75	6849.34	6623.34	8281.28	7674.94	7552.27	8608.43	7496.12	7112.28	5175.55	5901.22	5709	9482.2	8984.3	7553.25	8414.42	5177.81	5611.92	6946.45	7289.39	4016.74	5032.16	5325.61	4737.8	4987.86	4752.12	5890.07	5063.31	5175.99	3952.09	3711.31	3928.27	3949.16
X247	Maltotriose	738.549	5079.79	928.277	346.29	1468.98	1574.29	329.168	781.032	932.707	977.791	335.881	909.308	402.267	195.49	306.193	371.57	237.668	221.864	1446.29	604.279	1974.31	1445.19	4050.9	2390.1	375.515	326.68	111.412	676.413	172.33	177.593	181.898	165.477	71.3524	206.013	33.7534	411.911	319.047	207.586	125.497	124.737	159.558	362.352	308.222	352.539	326.065	295.692	386.685	77.6778
X248	METHYLMALONATE	10524.4	8468.66	13863.6	9346.65	8200.02	8424.52	6913.82	6277.88	7891.29	6654.78	8283.89	9627.96	9021.16	9305.05	10586.8	9959.77	10420.5	10306.9	7739	7158.92	9225.95	11257.7	6664.95	6377.57	6513.89	6755.34	9043.39	7142.43	7461.71	5290.96	5644.77	7288.48	8197.03	5959.3	5938.21	7343.82	10881.4	10391.5	10013.3	9969.87	10278.7	11370.8	10169.1	10485.7	8393.19	9246.35	12988.6	9299.73
X249	Methylsuccinic acid	274.46	289.357	400.104	1230.15	564.159	567.423	628.652	428.814	766.879	425.42	535.513	454.825	667.011	654.615	708.482	556.828	552.905	544.723	550.83	759.233	627.136	678.394	961.895	921.699	621.584	591.846	591.644	688.518	683.559	694.503	702.2	1201.19	1314.28	619.062	590.864	354.472	484.321	480.226	448.868	480.973	446.566	654.503	666.837	649.64	458.87	466.444	475.116	438.032
X250	Mevalonic acid	719.487	14.7068	132.094	6.78502	51.1748	55.6703	0	0	0	0	0	0	0	0	0	0	0	0	49.1729	34.4095	0	14.0076	76.1377	74.4064	9.48441	0	0	0	0	0	0	6.95184	0	0	0	0	334.282	325.614	287.358	301.229	325.694	0	0	11.2054	39.9722	35.9962	46.5966	0
X251	Monobutyl phthalate	508.14	601.132	494.537	485.531	622.213	425.879	718.799	644.785	816.317	622.604	468.887	476.44	629.965	516	672.179	547.243	496.224	489.097	1026.4	805.275	847.044	607.379	720.234	797.347	1041.57	597.665	750.647	875.03	873.957	1341.52	812.511	1046.8	1207.15	914.279	596.934	3277.51	1942.95	1725.29	2646.06	1891.14	2010.59	3199.37	3303.75	3617.74	1886.43	1113.64	1665.46	1986.24
X252	N2-Methylguanosine	104.614	73.4839	85.5186	59.57	127.028	128.092	151.546	98.7899	217.679	110.502	142.616	117.09	75.2846	95.0919	95.5706	133.399	116.112	99.0084	116.554	135.643	167.332	207.619	211.138	194.289	310.928	271.529	226.133	204.745	183.229	121.271	115.109	655.525	802.784	145.07	98.5061	374.167	839.322	1014.18	849.191	854.415	734.948	622.847	592.35	482.386	428.907	370.17	535.455	334.501
X253	N-Acetyl-1-aspartylglutamic acid	401.3	294.754	434.624	1030.73	276.313	221.055	438.181	419.228	505.787	450.892	346.881	388.197	377.315	326.265	342.563	324.364	341.277	359.371	526.325	317.173	682.353	749.178	527.698	461.514	416.164	374.376	342.827	353.139	358.721	318.914	302.745	627.87	565.815	1146.44	284.553	261.848	495.753	483.284	458.141	492.284	518.381	498.669	1349	1778.95	794.878	400.583	447.196	342.279
X254	N-Acetyl-D-galactosamine	1229.8	1058.9	1292.19	1181.87	968.615	842.266	1951.61	1078.14	1346.6	1044.36	997.001	1140.34	1005.39	1001.63	1163.77	1444.99	1300.61	1131.03	1037.97	1051.78	564.801	709.677	723.724	460.273	316.446	341.618	376.433	551.538	473.508	857.003	458.557	407.454	390.183	546.241	488.778	664.81	923.875	1002.35	862.073	934.104	810.161	1081.89	1038.96	1146.41	751.141	718.889	683.022	780.652
X255	N-Acetyl-DL-aspartic acid	1190.51	901.047	1042.9	1457.93	795.783	742.611	1168.33	1038.11	933.009	1009.42	1191.76	1137.13	942.365	878.281	906.546	979.3	1001.31	950.618	1523.29	1275.8	1187.5	1427.42	1284.51	1174.17	916.912	963.409	1151.25	1130.94	1114.74	1054.08	1045.69	1430.02	1334.89	1428.59	1132.94	531.288	881.755	929.694	936.918	945.486	1000.37	722.434	778.151	745.154	889.276	844.529	801.063	506.116
X256	N-Acetylvaline	1005.7	470.422	729.097	507.859	614.417	594.845	523.595	514.642	405.36	527.487	533.929	467.108	541.465	585.902	614.039	543.941	562.959	532.406	770.007	598.922	1037.12	1170.61	960.859	885.971	667.226	727.833	764.484	981.676	909.264	708.786	702.424	623.858	654.27	657.133	607.424	542.082	2018.85	2244.98	2017.73	1953.98	2064.15	611.945	750.231	775.644	719.206	690.594	702.566	659.712
X257	N-ACETYLGLYCINE	848.424	405.507	508.574	509.746	401.71	358.709	250.453	399.568	437.997	407.894	408.381	402.762	249.616	241.854	289.212	353.495	363.945	328.431	792.076	678.48	1588.46	1843.04	773.836	668.855	575.684	674.318	703.868	398.208	344.242	335.303	371.232	759.931	814.437	376.704	351.932	523.053	2483.14	2656.85	2403.21	2387.22	2449.02	631.919	783.893	770.637	989.18	915.657	924.975	557.274
X258	N-ACETYL-L-ALANINE	1275.86	2468.32	1376.51	1852.61	2652.54	1770.23	7520.05	3015.44	997.665	3239.86	2563.06	1692.62	1914.41	2469.23	4147.42	2856.63	2317.51	2034.73	4908.08	5590.65	1868.53	3358.69	2774.26	1439.88	1571.69	1605.05	2092.65	2548.07	2198.04	3882.24	2048.69	1300.57	1650.83	1332.13	1192.75	1233.31	1047.24	1057.44	919.097	886.53	854.831	1321.26	1221.16	1297.81	1185.43	1162.11	883.461	2023.9
X259	N-Acetyl-L-glutamine	631.557	675.568	1158.84	889.113	679.722	611.816	1048.37	716.83	1099.3	714.743	812.356	689.555	823.99	912.783	882.972	1090.08	1072.23	1023.9	1022.9	930.27	1110.16	1204.45	642.258	617.771	1130.81	1226.12	1660.22	1056.65	873.952	702.238	751.113	630.843	749.907	755.502	790.877	741.365	623.43	657.207	566.016	647.727	538.55	617.094	709.117	643.245	645.344	672.986	719.286	884.919
X260	N-ACETYL-L-PHENYLALANINE	483.838	595.658	339.751	613.447	334.382	284.554	613.29	461.739	273.802	498.226	304.683	335.359	442.668	523.323	750.529	546.679	494.092	429.638	1891.94	2275.89	1966.33	2403.68	1920.44	1775.68	1217.77	1361.56	1222.87	2046.95	1622.66	1521.1	1445.71	729.664	794.093	1732.46	1596.54	111.602	129.878	213.095	145.605	152.278	130.045	223.537	169.807	160.316	234.843	140.103	116.344	141.103
X261	N-ACETYLNEURAMINATE	11892.9	7529.75	10448.7	8704.86	7691.13	7305.4	9320.69	9580.69	10809.7	9355.94	10115.7	10254.5	8392.97	9534.56	9045.33	9476.61	9231.33	9382.98	5814.66	5847.69	5906.43	5880.8	5030.99	4556.75	4883.36	4964.1	6136.13	5600.89	5383.69	3861.15	4108.76	5376.52	5841.35	4129.81	4079.4	6018.14	7218.64	7753.98	6761.42	7497.92	6735.03	6804.59	6446.14	6338.61	6068.72	6037.59	6724.71	6527.64
X262	NALPHA-ACETYL-L-LYSINE	822.293	667.289	697.254	789.357	730.138	696.159	1068.3	940.337	529.176	1055.46	934.141	838.801	854.004	1005.84	1001.5	804.032	825.432	787.056	894.203	1022.31	688.519	812.708	752.424	685.082	485.977	522.497	611.6	656.573	654.185	760.364	720.374	704.361	863.581	688.075	645.574	312.624	555.107	526.541	513.452	504.764	503.497	344.635	287.662	217.862	312.382	355.579	268.446	395.658
X263	N-Tigloylglycine	283.341	116.56	146.653	134.502	107.298	103.897	48.2992	72.5982	93.916	78.1654	73.5641	68.0445	77.174	74.2471	75.5841	59.9528	83.7549	81.2582	194.344	121.987	251.58	267.544	206.922	188.334	106.571	125.68	122.145	109.246	110.094	117.878	101.801	167.172	175.458	119.912	113.959	159.191	806.38	838.384	803.033	759.209	796.474	163.872	176.753	178.493	218.678	206.241	206.685	148.57
X264	Ochratoxin A	25.249	143.455	10.51	0	31.074	45.6177	0	0	0	0	0	0	0	0	0	0	0	0	1184.32	2037.38	129.249	146.276	61.451	64.5149	0	0	0	5.3712	0	0	0	0	0	0	0	0	138.926	174.987	113.183	163.779	155.024	0	0	0	0	0	0.15853	0
X265	Orotic acid	1412.74	1075.08	1434.5	1953.15	1643.2	1581.5	1115.52	1540.17	1087.39	1544.46	1925.89	2189.86	1256.8	1252.23	1211.63	1071.97	980.78	928.334	807.342	880.052	996.425	1151.44	934.347	927.592	759.575	690.815	815.798	717.505	891.215	601.506	640.551	946.08	1050.22	581.961	554.788	866.434	1162.07	1230.12	1129.98	1106.86	1026.73	987.835	1025.56	986.03	613.313	579.624	674.243	962.868
X266	Perindopril	3912.12	1020.1	1748.08	1304.66	276.773	318.945	304.401	320.536	2074.57	582.625	448.045	1467.67	538.241	526.437	659.719	712.655	491.959	646.057	382.55	196.264	323.131	298.957	373.61	270.561	279.503	290.957	195.832	182.74	689.315	114.027	231.596	511.592	565.792	163.097	171.614	1523.38	1922.49	2161	1935.45	1478.4	1489.34	2941.62	3899.83	3054.06	996.029	1389.51	2779.31	2374.98
X267	Phenolphthalin	993.776	875.283	965.562	814.974	960.079	953.795	1339.04	961.012	671.243	1114.12	1066.31	900.747	1059.21	1018.7	1166.98	932.19	967.283	776.808	927.807	799.542	943.024	1069.1	918.49	754.394	979.333	1079.41	1116.65	1389.79	1159.76	1065.2	1153.18	667.788	708.09	1015.57	901.412	685.609	871.126	845.346	847.63	698.198	808.841	675.498	832.868	931.225	831.073	813.622	889.998	728.307
X268	Phloroglucinol	29.8438	47.6023	42.5313	34.8462	33.1557	31.0846	13.96	26.4859	43.52	32.6814	34.8707	22.3622	19.3552	25.8365	26.226	27.8226	38.3324	23.7847	88.0577	72.4636	103.679	150.218	88.933	80.6345	68.4292	94.264	86.028	45.7559	43.2181	51.9719	54.9406	268.946	293.558	83.6478	71.774	32.1214	136.056	157.859	154.697	125.991	158.396	96.9544	86.4143	48.237	111.555	91.3601	91.3113	47.7918
X269	Porphobilinogen	876.938	528.584	614.5	783.13	686.206	661.428	884.969	688.916	553.353	663.694	794.469	689.988	718.274	707.422	750.33	632.737	619.721	608.432	640.302	794.182	699.934	789.504	716.638	607.785	654.673	708.617	707.095	628.164	582.005	600.241	616.173	780.297	822.332	451.778	434.351	389.25	926.901	939.746	843.548	849.157	866.743	406.862	641.06	620.653	627.966	625.14	647.256	920.575
X270	Prostaglandin E1	43186.7	24982.2	57294	36055.6	13073	12043.4	16782.4	17512.4	32994.7	18517.6	23593.4	36612.1	28981.8	27070.8	29737.5	40997.7	39370.9	43815.9	23053.8	21961.6	23427.4	20013.5	17394	15080	18257.6	22379.7	28652.3	16599.9	21414.2	11738.3	12944.3	18573.7	23729.1	15959.2	14623.8	18108.5	31087.5	32613	27790.2	28529.7	30457.6	19797.7	23910.3	24742.2	14329.3	17595.9	27313.8	25510.7
X271	Prostaglandin E2	13291.4	7393.76	16087.9	13514.1	3967.38	3664.32	6388.23	8267.61	14358.1	8630.79	8655.92	13811.9	14540.9	14270.9	13966.5	9947.54	8973.34	9931.44	12495.3	8213.68	11043.1	7208.49	9317.94	7212.61	6465.9	5458.13	6526.4	12205	12610.6	6986.91	7048.16	14713.6	13995.4	8675.78	6298.59	5993.42	6771.09	6128.68	6306.05	6506.02	6453.26	7596.71	10881.9	12460.4	5872.75	7197.29	10977	15881.1
X272	PYRIDINE-2,3-DICARBOXYLATE	680.348	609.899	787.785	761.669	641.015	585.32	761.306	877.935	793.552	883.784	957.457	835.055	754.302	699.933	781.541	957.489	869.964	947.204	617.348	703.674	802.272	786.994	643.498	638.115	751.145	863.652	891.972	839.013	780.13	638.057	687.673	1371.4	1462.39	787.052	780.905	716.427	919.986	818.814	756.395	843.201	863.537	745.012	759.842	791.895	654.292	735.831	806.655	691.869
X273	S-(5'-ADENOSYL)-L-HOMOCYSTEINE	2882.66	1532.74	2093.55	865.445	1811.12	1853.2	1278.75	1533.87	1925.21	1534.3	1912.02	2215.7	2319.75	2206.23	2199.32	1930.07	2034.39	1849.25	864.758	843.755	1109.42	1143.47	1149.09	1211	792.479	704.629	906.676	712.293	940.724	612.914	711.464	916.149	940.019	597.435	596.189	543.595	1247.35	1442.3	1153.55	1035.48	1465.69	992.753	960.223	963.339	987.102	1064.89	878.171	857.855
X274	SUBERIC ACID	1689.23	1993.02	2615.41	4346.32	2040.14	2044.57	1745.74	1349.06	1810.68	1540.94	1482.86	1457.59	1797.12	1839.22	2266.32	2477.31	2562.46	2461.94	4185.72	4180.58	11799.7	12792.4	9619.9	8436.27	3944.93	2919.55	3514.72	4524.77	3595.53	5423.59	5104.02	10489.9	11342.5	3864.48	3555.51	3210.86	5212.36	5599.89	5984.35	5384.23	5378.68	3774.78	5850.68	5490.53	4403.03	4825.86	4544.43	4227.74
X275	Tetradecanedioic acid	3478.05	8264.76	5021.51	6035.81	3429.86	3167.98	2231.08	1759.96	2895.79	1961.66	2381.52	2224.68	2339.05	2565.44	2724.6	1892.37	2267.83	2070.67	5797.25	6739.39	3514.59	4442.73	4254.55	4601.3	2435.75	2809.4	2960.33	2059.62	1967.23	2143.74	2302.72	3511.85	3812.25	2272.2	2173.56	1609.23	5603.05	5938.29	5418.82	5578.59	5301.84	3365.55	2271.23	2323.65	3691.58	3989.72	3740.69	1914.28
X276	THYMIDINE	27810.6	22704.5	22027.4	27703.3	18825.2	18304.8	29996.3	20935.5	24543.1	21890.8	24331.2	22361.8	20746.3	22513.9	22724.5	19979.8	21483.5	20018.1	24319.1	28998.6	20133	23786.8	23591.8	22709.7	21877.2	25351.2	25211.1	18298.5	16691.2	22448.9	22845.9	21402.8	21360	19847.7	20498.8	17092.1	19342.2	19948.8	18454.7	18571.5	18036.1	19934.8	16795.5	16083.9	16183.7	15403.6	15499.3	14609.5
X277	TRANS-CYCLOHEXANE-1,2-DIOL	20.3903	26.8811	145.75	210.99	66.1573	69.3553	80.6116	58.9719	60.9349	58.2018	66.3945	62.4895	163.263	157.18	183.165	151.056	151.507	148.929	133.029	239.952	221.602	268.23	236.358	227.651	128.675	126.598	132.85	353.548	330.848	368.948	401.089	408.28	413.124	230.024	223.836	58.7939	98.0228	113.314	95.5105	90.2056	85.257	109.094	182.974	188.843	103.101	89.7467	100.907	200.263
X278	URATE	142630	102109	120991	120505	117595	113065	116442	128431	162739	131707	143609	145795	116714	117039	115738	150512	142730	138580	120954	110878	115144	127095	117317	105843	143798	147492	144990	101933	103915	88537.6	96173.1	175864	199767	109278	103813	171748	260329	262703	247100	242008	228734	227083	222840	208638	188084	187243	240481	164630
X279	Uridine	54658.9	52424.7	75515.7	62165.1	52471.7	51294.8	64211	50442.7	73322.8	54052.1	59624.8	62051	62405.4	66838.6	64834.1	79730.5	83052.6	77141.3	56895.2	46966.4	48573.1	53801.6	44238.6	42816.9	50535.7	50579.8	60948.2	48357.7	52531	37612.6	42010.5	48420.4	55488.4	47170.9	45159.2	51215.1	70030.8	77000.6	68738.7	71084.9	65085.9	70349.1	67857.5	68108.7	55554.7	56688.7	73706.1	51618.6
X280	URIDINE-5-MONOPHOSPHATE	335.881	550.743	315.329	301.71	216.57	151.961	878.105	1845.88	409.251	2202.17	1955.16	2195.6	1134.82	1022.97	963.747	1574.68	1003.81	1510.46	326.356	1910.13	164.183	1584.98	183.248	100.455	471.989	400.803	330.624	883.834	984.686	697.646	750.195	231.041	97.4283	1447.61	759.409	46.5719	76.8884	101.259	79.1386	55.1164	96.0486	66.1952	134.493	138.29	79.2997	107.938	109.656	101.129
X281	CYSTEINE	1713.15	1791.22	1044.06	1241.02	1807.83	1563.93	1654.09	2227.66	1419.14	2405.79	2287.98	1936.89	1412.67	1578.11	1734.16	1489.91	1575.64	1496.72	1936.32	1936.48	1942.04	2173.79	2404.56	2070.42	985.112	864.065	1238.55	2029.05	2059.17	1715.27	1429.65	1474.49	1789.76	1655.02	1538.46	962.432	1601.93	1598.94	1440.51	1444.51	1457.57	1601.43	1187.42	996.806	1228.67	1309.23	1309.47	1137.8
X282	GLUCONOLACTONE	222.458	182.348	223.133	256.045	401.647	288.81	306.14	256.708	288.792	378.265	350.756	308.137	300.918	307.531	327.93	322.279	323.947	315.674	511.124	497.726	397.385	433.399	392.783	402.513	354.44	348.578	429.849	454.019	593.428	466.084	458.25	387.532	481.854	343.009	385.919	238.897	161.404	264.361	203.575	159.302	238.226	163.57	312.28	285.886	306.306	279.809	177.926	184.064
X283	NICOTINATE	136.493	177.482	194.751	178.392	153.749	142.143	230.771	218.567	151.671	230.27	246.293	274.496	217.392	215.246	220.295	270.448	258.341	225.872	222.923	260.077	260.979	269.765	204.06	183.808	211.444	231.949	239.258	292.631	271.972	283.108	284.047	481.943	506.178	306.891	306.98	253.421	298.055	276.094	264.219	249.481	258.562	242.337	216.121	231.769	258.383	270.477	238.917	215.544
X284	METHYLTHIOADENOSINE	86.5279	0	0	4.07459	0	6.22461	851.414	622.431	392.269	620.359	719.303	669.87	515.182	518.732	594.812	828.522	877.167	775.052	21.4924	0	47.2966	60.7728	41.3651	46.1693	216.971	205.257	206.083	830.87	682.458	532.542	531.552	546.066	561.968	729.375	685.614	266.571	378.624	413.696	399.841	373.084	370.397	20.9643	162.081	167.843	148.532	134.495	142.406	291.301
X285	GUANINE	257.1	128.218	148.952	183.638	123.738	139.807	82.0136	120.979	140.51	125.641	167.014	217.982	140.945	163.338	146.168	127.967	157.252	124.847	158.57	170.107	205.93	189.775	187.19	140.647	160.061	190.766	207.244	173.813	156.743	134.744	140.261	177.49	222.738	181.448	174.792	154.947	337.422	273.485	250.376	209.424	203.153	291.235	217.494	168.476	209.531	147.73	242.668	234.064
X286	NICOTINAMIDE MONONUCLEOTIDE	3347.87	3734.23	3442.16	4235.54	3510.37	3976.75	2798.29	3489.83	3158.85	3212.43	3894.85	3166.55	3659.22	3647.19	3238.85	2880.54	3078.22	3019.72	4268.97	5039.81	5089.24	4787.15	4897.84	5209.39	3390.96	3874.82	4130.93	4622.1	4522.25	4510.42	4746.93	4036.96	3697.03	4101.91	4456.87	3221.74	2743.55	2372.77	2855.44	2702.47	2905.83	3647.15	3036.96	3149.94	2569.74	2903.66	2586.33	3382.89
X287	ISOCITRATE	386.834	415.493	516.719	732.08	564.767	526.843	614.115	407.764	544.698	401.925	406.193	501.279	424.862	470.85	524.642	577.383	535.799	452.735	415.827	373.034	403.28	435.271	361.792	339.356	479.813	543.587	444.688	434.54	429.496	386.567	358.219	760.161	663.122	511.369	477.811	372.333	664.909	729.076	620.349	598.011	710.387	656.116	482.281	396.606	706.819	721.679	684.12	523.05
X288	N-ACETYLTRYPTOPHAN	156.228	931.999	256.237	410.646	882.177	797.421	825.513	353.751	157.533	423.898	401.35	190.974	488.214	526.416	702.807	1002.06	1265.76	1145.55	2194.28	2729.16	2829.81	3403.58	2234.85	1990.62	1176.04	1305.42	1315.51	1744.17	1602.04	1557.76	1692.97	1181.93	1399.35	2168.52	2172.11	779.288	137.543	192.772	145.073	173.471	118.491	341.629	390.407	221.337	438.851	277.749	170.746	393.828
X289	3-SULFINOALANINE	211.014	268.347	142.302	148.888	220.054	182.005	266.861	326.831	270.156	333.824	278.024	325.815	285.644	264.962	243.247	304.327	245.533	235.089	217.123	173.67	223.748	211.985	286.27	173.28	137.661	110.923	192.68	278.904	278.557	297.767	279.015	143.809	198.731	271.625	231.635	121.883	173.908	160.531	136.48	125.758	145.727	184.688	167.396	146.732	147.609	183.776	135.339	110.514
X290	O-SUCCINYL-HOMOSERINE	421.551	417.728	505.853	432.972	321.866	328.635	356.285	356.942	385.03	377.446	468.775	523.243	327.7	358.465	422.155	439.25	455.595	489.841	415.442	468.598	335.647	505.844	517.532	422.32	398.054	379.903	387.532	415.548	472.048	441.912	396.696	274.425	325.355	306.677	319.508	357.056	348.501	451.559	405.378	442.969	473.269	375.313	488.567	472.602	506.448	384.551	433.33	386.17
X291	D-GLUCURONOLACTONE	11429.8	5924.74	6609.24	5885.94	8615.49	10568.4	9839.66	5464.27	6962.13	4894.6	6623.01	5190.24	6400.11	6103.85	7555.09	5864.85	4966.31	4460.21	2268.99	2261.52	3030.54	3514.9	3261.57	3011.82	2904.4	2764.04	3118.89	6450.37	5233.53	3197.71	3243.87	5323.08	5506.68	2773.54	3178.94	923.178	500.23	618.887	549.238	598.5	464.208	2112.88	617.492	811.147	328.601	635.82	679.211	1619.14
X292	PARAXANTHINE	712.752	701.681	1008.38	1033.03	960	1019.81	693.957	786.885	1006.67	925.597	1041.41	1180.93	582.802	761.78	920.822	1069.34	1082.21	1212.57	632.536	820.423	799.594	878.753	937.189	1031.52	695.939	704.513	871.085	883.909	928.113	517.893	594.081	610.583	730.647	786.121	757.495	570.877	716.176	924.443	997.808	1154.51	1308.56	866.599	1022.87	1046.15	1069.75	1044.85	1222.82	857.975
X293	GALACTITOL	1167.51	965.763	1210.4	1449.54	1551.44	1528.29	632.505	890.254	874.287	1035.17	1073.22	1554.5	741.384	734.224	738.671	1268.74	1007.06	1020.63	735.68	1170.08	563.703	620.206	747.671	472.452	273.921	473.859	431.865	570.614	529.735	405.265	471.312	360.305	530.88	541.189	464.977	644.541	638.459	671.911	594.707	521.256	562.704	568.775	796.343	922.862	745.947	839.614	748.062	469.526
X294	OXOPROLINE	36076.7	35284.2	46701	39763.5	29808	31941.6	36948.7	33981.3	32434.9	33204.3	40779.5	40230.2	37459.4	36041.5	38857.5	38820.2	39246	37986.2	52393.2	59372.9	44486.9	57358.3	45024.2	39880.6	43057.1	46865.5	51416.6	53299.9	45674	48246.1	44437.7	44922	45756.9	36071.3	39246.6	38005.5	45168.1	49047.1	45970.1	43651.4	43927.8	50135.8	45106	40182.1	42916.2	41366.1	40227.8	35117.2
X295	4-PYRIDOXATE	938.41	305.837	699.829	145.061	166.881	187.531	97.3823	667.373	168.745	674.02	803.478	739.984	139.164	115.415	142.612	114.18	125.689	120.323	560.055	349.732	827.281	1043.17	981.424	946.783	382.896	495.732	417.544	572.588	498.774	232.531	214.151	1453.9	1490.96	347.668	359.555	200.23	2360.96	2786.87	2248.13	2374.72	2676.42	265.504	434.139	487.474	675.966	626.615	582.731	120.591
X296	QUINOLINATE	287.956	265.286	423.394	370.723	186.066	225.781	369.311	315.662	259.487	305.483	495.14	351.122	262.67	256.603	282.282	298.58	385.512	370.03	462.774	310.674	414.762	310.053	357.549	362.481	312.33	437.092	415.008	474.457	440.574	460.759	389.957	278.958	259.38	445.349	334.878	401.808	481.075	425.092	421.924	404.437	424.986	312.734	351.547	370.595	367.027	316.744	332.451	385.301
X297	1-METHYLADENOSINE	263.912	204.506	287.895	279.424	208.445	239.373	232.291	183.503	200.056	249.11	252.062	256.575	204.502	192.751	258.379	211.529	214.785	165.233	228.552	270.198	175.885	248.02	166.668	145.68	139.753	197.864	151.846	174.7	139.59	163.358	199.102	167.633	190.313	154.867	135.038	95.5216	182.857	185.408	178.097	161.765	175.834	130.581	119.064	98.122	132.241	122.463	130.455	44.6128
X298	4-ACETAMIDOBUTANOATE	1016.02	298.338	495.28	554.6	543.727	549.144	162.288	216.632	295.79	225.254	249.847	250.1	206.576	216.746	223.101	251.16	237.842	242.711	565.886	489.765	878.946	1033.33	577.587	579.597	372.657	421.173	452.11	288.818	284.771	292.612	271.549	631.374	661.456	309.11	296.151	404.031	2384.69	2561.64	2360.15	2308.86	2355.97	766.732	670.377	635.231	801.358	790.035	794.249	483.46
X299	NORVALINE	116.669	129.523	148.658	144.415	175.88	167.592	292.036	211.561	147.891	199.953	202.202	193.622	226.267	251.354	280.842	236.712	240.428	224.574	199.112	207.212	191.838	251.014	233.664	200.81	214.648	230.993	263.798	355.395	369.389	260.854	288.111	212.555	218.341	277.445	265.338	150.479	184.167	204.175	175.132	189.001	191.614	173.209	196.625	192.096	194.994	192.522	202.256	182.592
X300	D-ORNITHINE	6756.92	6854.21	8004.66	6775.14	8471.4	7605.91	6640.88	7172.64	4766.18	6262.09	7454.09	7283.76	6255	6630.54	5994.44	6790.61	6347.18	6731.31	7589.88	9269.09	6500.46	7382.73	6222.37	5756.57	5566.34	6105.69	5754.23	7406.37	6529.31	6645.5	6763.06	4671.49	4568.87	6122.23	5818.13	4803.7	7697.85	8329.83	7357.75	7311.64	6887.08	5616.52	5772.58	5122.68	6852.11	7154.5	6829.81	5164.71
X301	S-ADENOSYLMETHIONINE	267.59	161.945	40.3481	208.264	205.397	180.541	45.5277	203.01	128.112	171.491	138.426	113.987	99.414	38.3166	126.355	202.273	149.802	139.952	927.444	635.589	621.018	975.381	764.913	561.727	542.681	604.101	466.148	120.893	211.337	336.196	156.736	807.351	549.456	281.75	354.782	575.522	1292.19	1516.35	903.855	723.943	1386.27	121.8	567.247	432.821	1509.01	1056.66	840.469	949.501
X302	GLYCERATE	9086.06	6545.3	6493.63	5635.54	5796.7	5580.54	7011.95	5995.3	7763.13	6663.21	5960.82	9351.3	9095.06	8919.03	9166.89	8206.69	8264.65	7324.89	6727.29	5642.67	7078.53	7899.56	5980.5	5623.28	6471.27	5694.01	6403	8235.04	7917.23	7118.64	5737.41	8098.19	8307.88	7945.75	7223.98	4803.78	7670.68	9631.97	8847.01	8422.01	9085.87	7498.02	7042.53	5750.68	7025.35	6782.42	7726.92	7397.59
X303	PHOSPHOENOLPYRUVATE	988.293	862.93	1207.29	961.387	702.171	723.137	959.928	919.226	987.176	846.194	1190.97	1170.97	962.216	857.663	802.795	1212.26	1095.1	991.435	1394.62	1474.77	1163.92	1223.09	1085.44	813.5	1123.81	1342.12	1350.73	1198.94	999.105	865.171	892.01	1256.06	1434.96	690.121	893.514	1126.8	1532.67	1682.83	1572.82	1562.1	1242.77	1446.8	1719.27	1469.22	946.257	1332.94	1260.73	1068.05
X304	O-PHOSPHOETHANOLAMINE	514.241	335.155	446.802	456.722	328.382	367.3	325.468	379.351	415.095	359.331	471.099	435.25	399.251	392.135	384.381	424.789	450.668	414.156	489.432	454.119	552.097	569.733	524.688	421.823	478.685	537.693	473.431	561.246	495.006	477.541	454.494	532.877	617.142	419.009	450.846	520.718	681.666	703.836	630.15	602.355	582.523	580.063	584.647	491.535	479.206	462.915	548.758	512.314
X305	FRUCTOSE 6-PHOSPHATE	1826.54	1331.58	1405.77	1426.25	1467.96	1488.4	1311.15	1516.6	1920.27	1560.04	1621.04	1547.86	1500.31	1449.24	1287.98	1686.57	1673.39	1623.89	1350.56	1290.53	1439.91	1475.05	1396.4	1289.06	1675.01	1615.19	1685.9	1200.56	1267.7	1101.89	1182.87	1819.18	2022.98	1358.89	1307.13	1956.43	2244.63	2211.49	2291.27	2276.19	2157.95	2301.12	2178.15	2190.12	1839.76	1893.86	2182.58	1923.36
X306	URIDINE DIPHOSPHATEGALACTOSE	381.283	128.793	246.167	212.589	249.898	144.244	254.779	360.014	569.427	311.999	386.873	481.257	203.114	197.641	234.159	485.358	315.557	319.257	222.43	215.7	115.217	317.131	281.536	131.597	410.452	408.936	275.611	124.687	164.033	141.191	84.2956	502.405	695.58	168.664	119.39	831.643	1357.92	1390.72	1535.6	1236.01	963.303	911.354	1102.92	1189.27	685.682	797.724	1388.4	517.504
X307	DEOXYURIDINE-MONOPHOSPHATE	1475	1343.91	1554.82	1400.6	1395.94	1377.02	1335.49	1373.53	1306.29	1341.58	1332.13	1340.8	1396.27	1406.73	1406.21	1423.69	1353.86	1340.52	1307.86	1282.74	1171.56	1185.23	1235.03	1277.37	1136.9	1185.7	1475.27	1278.05	1242.82	1071.84	1165.88	1206.09	1279.39	1150.42	1298.52	1127.2	1396.44	1356.44	1354.58	1305.83	1052.69	1201.97	1231.91	1266.98	1259.48	1241.37	1345.86	1214.5
X308	GLYOXYLATE	235.668	234.538	113.528	232.796	114.422	127.708	199.854	239.733	207.759	256.036	162.963	279.638	210.034	173.544	185.76	151.839	135.11	132.442	191.111	132.549	252.169	236.563	165.94	152.224	110.609	134.023	153.039	75.3378	121.811	104.325	84.6372	159.475	203.995	100.895	85.3037	78.7436	90.2268	168.709	136.111	144.278	138.935	153.106	104.944	102.285	100.686	74.8078	77.27	121.756
X309	GUANOSINE MONOPHOSPHATE	1275.08	1298.87	1594.96	1286.8	1737.19	1489.38	3137.61	2324.87	1292.77	2312.33	2458.15	2081.83	2920.74	2990.96	3042.69	2344.14	2637.43	2586.11	2899.55	2500.88	2370.55	2682.82	3087.08	2886.68	2835.98	2791.94	3267.28	3190.9	4658.01	4268.62	3858.6	1865.75	1884.43	3563.99	3580.57	1531.89	2197.23	2453.47	2089.93	2140.72	2328.21	1606.76	2163.78	1715.4	2322.65	2087.56	2214.5	2130.07
X310	CYTIDINE MONOPHOSPHATE	175.039	78.8586	97.7074	86.5422	46.3875	37.6627	232.81	265.635	131.135	313.027	322.241	388.165	271.829	216.992	245.055	421.185	402.065	406.954	89.9077	267.611	60.8479	202.081	43.8702	33.2784	172.038	102.986	133.333	103.107	108.819	183.606	98.2849	64.4436	61.0694	203.739	245.95	7.69373	0	28.3411	10.5738	0	0	0	27.6332	12.0229	36.7381	0	0	23.0617
X311	5'-DEOXYADENOSINE	637.638	627.292	870.055	856.716	723.312	738.438	741.682	703.392	751.735	715.491	797.714	795.975	641.7	706.274	681.938	647.815	694.095	595.809	478.69	523.35	392.837	449.643	323.016	276.115	316.614	346.208	333.897	355.758	341.428	365.624	396.116	322.814	410.26	323.985	355.477	221.841	491.772	527.616	466.478	481.286	507.3	457.276	322.144	335.921	403.703	324.325	323.434	441.07
X312	N-FORMYLGLYCINE	196.095	95.7947	202.584	290.58	105.005	168.789	111.806	151.542	126.964	162.604	117.957	126.8	122.806	168.537	60.6039	135.627	104.559	103.228	145.576	118.663	100.261	84.3582	108.774	121.349	85.0622	85.7084	110.559	71.8561	93.9792	67.0597	88.3706	167.238	137.863	108.97	113.591	40.8536	112.466	143.396	167.396	155.376	176.399	92.433	68.1644	87.0261	92.5123	72.8009	102.383	83.414
X313	3-METHOXYTYROSINE	3137.76	3011.32	3042.36	2861.5	2373.47	2549.35	3320.51	2912.64	2708.39	2717.41	2966.12	2907.95	3200.72	3207.69	3323.38	2987.26	2953.08	2630.41	3537.01	4045.43	3742.01	3958.79	3678.22	3537.68	3323.62	3406.67	3196.23	3545.01	3320.62	3434.6	3328.49	3195.96	3250.9	3471.26	3356.27	3180.5	3463.5	3717.8	3231.8	3410.58	3210.92	3759.88	3828.46	3543.21	3143.09	3529.39	3454.68	3520.21
X314	5-HYDROXYTRYPTOPHAN	133.442	155.292	166.426	113.59	156.75	136.458	207.686	88.6968	121.821	87.1896	106.39	142.23	194.714	196.058	159.916	163.691	170.658	174.856	161.022	227.695	142.775	261.598	171.569	147.585	116.017	99.0926	76.9733	135.081	150.139	164.496	152.163	116.137	120.209	128.496	120.667	93.6063	92.497	146.481	116.881	106.696	144.66	151.25	200.633	151.778	138.298	96.8058	101.846	161.425
X315	3,4-DIHYDROXYPHENYLGLYCOL	48.8661	48.0487	35.2868	50.5524	70.1422	68.4153	44.8918	46.0292	48.0356	65.1027	45.4843	45.5094	64.1084	61.5083	59.6579	51.6666	55.7397	59.0514	65.1249	69.667	77.2278	78.8841	60.2657	49.4003	78.8364	67.6995	88.3041	60.4612	56.7984	70.361	75.3109	104.723	137.486	67.1622	55.708	96.8636	108.865	93.6284	103.645	87.9281	84.8937	197.868	68.0195	59.1146	73.1402	110.154	86.194	184.196
X316	2-HYDROXYBUTYRATE	10677.8	9016.21	8078.76	12109.2	10065.3	9553.41	17272.4	18141.5	27842.8	18580	20981	18305.2	16878	17545	18571.3	13618.7	13679.7	13235.7	12598	12356.8	19170.2	21879	13641.5	12330	26308.7	28702.5	31733.7	22003.3	19298.4	16013.4	16222.6	50462.2	54657.8	18736.1	15392.1	23530.8	38454.1	44278.7	40001.9	40198.6	39886.9	75616.5	37852.1	29577.9	50012.7	55195.8	55033.4	33808.9
X317	GLYCEROL 3-PHOSPHATE	59.6065	130.705	67.0115	126.067	141.774	99.491	76.3266	337.281	54.6283	373.192	108.177	76.8762	61.6693	83.1808	88.5789	52.1795	9.6834	40.1859	264.478	235.146	132.048	151.57	165.392	67.6412	113.156	294.443	156.706	236.904	154.449	183.559	112.935	141.28	230.011	257.193	199.467	253.419	416.531	264.982	286.607	241.143	429.094	1086.81	552.535	455.139	511.556	557.822	238.399	260.084
X318	GLYCOCHOLATE	102662	94016.3	289248	136543	38494.5	16315.5	27713.1	23607.9	15468.1	29565.1	27565.9	14667.6	49526.9	32870.4	37657.6	6100.36	24400.1	5777.7	106557	120990	155674	179151	149573	143845	57405.1	71307.4	67361.6	13260.8	13558.1	10368.5	7529.52	22023.8	19919.9	8818.01	8571.38	36799.9	117353	117800	97058.5	86483.9	104183	32400.3	53060.3	54230	98673.3	96454.7	107207	31419.7
X319	THIOPURINE S-METHYLETHER	3916.1	733.294	9615.77	9459.08	1946.81	1835.92	29097	53529	41629.3	53875.7	61190.9	57407.8	45958.9	44705	46992.6	37762	37996.9	35361.4	106123	3942.15	105268	131612	242022	237948	30383.4	33749	35522.4	39493.9	36522.3	31592.2	32473	63478.7	68251.6	50702.7	46819.7	36149.4	52582.4	57076	50491.4	50083	50706.9	34123.5	35647.8	33139	40933.1	38611.1	38492	28328.6
X320	N6-(DELTA2-ISOPENTENYL)-ADENINE	814.063	684.077	832.487	757.924	573.439	709.546	1906.76	790.988	1054.46	966.309	762.838	1070.09	1216.33	1233.95	1356.29	1511.2	1527.69	1073.17	676.31	472.196	668.691	741.101	850.163	676.022	894.363	966.843	1053.55	963.517	1095.95	839.701	918.596	461.602	557.034	670.282	649.119	676.932	959.092	1209.99	910.157	1092.07	955.457	543.616	1078.26	1099.76	739.692	573.246	1014.94	539.414
X321	2-OXOADIPATE	197.409	168.817	113.481	110.855	196.945	183.567	290.117	191.414	160.261	199.091	222.274	195.904	230.076	243.571	243.437	231.081	229.429	204.494	196.848	166.212	267.398	344.566	422.357	399.244	459.556	535.623	464.14	498.094	491.426	532.789	500.917	486.335	457.074	350.626	309.409	141.59	207.915	225.339	201.945	200.428	183.465	212.097	178.355	173.443	182.318	194.345	188.813	139.779
X322	KETOLEUCINE	21869.3	28912.2	25705.8	22227.1	20900.3	20030.4	30263.4	25251.6	25687.3	25441.6	24154.3	22173	30253.2	29462.9	27605.3	25801.9	25301.2	24125.9	32694.3	22173.6	25069.4	29028.8	25693.4	24827	32110.3	35772.4	30912.1	43458.8	41745.9	33688.1	33672.3	32598.2	34967.2	34287.2	33299.2	20075.2	33444.9	32742.6	30029.2	30802.3	31311	49760.8	55697.6	52869.3	38853	38669.9	41518	34686.4
X323	2-Hydroxycinnamic acid	732446	735488	733597	780522	806043	633083	1.02048e+06	850825	788037	698121	756644	563702	677222	697882	704374	671011	701118	683755	880561	917545	755598	900441	901113	727157	574209	810228	806778	973982	820498	601153	642532	1.02314e+06	970909	788901	717449	338070	422867	541899	509382	481829	466287	1.01101e+06	909242	725658	506226	483142	387516	570315
X324	4-Acetamidobutyric acid	1089.64	1428.61	1354.54	1559.7	1757.86	1582.33	1865.71	2548.4	2146.55	2077.49	2315.94	2481.25	1406.11	1802.1	2201.93	2130.36	2252.75	2460.93	2075	2890.95	3891.68	4992.57	3537.78	2940.44	5435.51	5934.59	5783.33	6992.02	5033.44	1746.33	1730.46	4091.37	4012.68	2032.92	1774.02	2380.96	4701.28	3901.2	2315.3	3214.74	2909.55	2740.87	1341.73	1350.59	1964.26	2738.65	2164.38	1831.65
X325	5-Hydroxy-3-indoleacetic acid	9858.15	21094.7	22826	18770.1	7368.83	7331.37	38618.6	31832.1	7471.27	26110.8	30944.3	33644.2	23058.3	23743.8	22616.7	25645.4	27723	26570.3	15214	22348.2	14744.3	19622.6	10672.4	9419.87	10856.3	11770.8	11323.3	10050	9839.66	19905.3	24554.5	22193.6	22283.4	18386.1	17519.2	11174.3	25945.6	28764.4	27761.8	25715	24206.7	21777.7	17778.4	15240.3	11961.4	12927.1	13285.3	18553.5
X326	Cystine	2543.79	2989.03	2413.02	2952.12	4420.06	3427.01	2498.05	1793.56	2856.7	1766.87	1781	3117.61	2168.43	2324.94	2512.53	3046.28	3583.21	2454.4	3272.58	2599.03	2962.36	6376.46	3994.76	3882.71	2149.12	2511.07	2296.31	3210.31	3110.9	1683.12	1209.35	2066.03	2183.94	2241.59	2082.91	936.898	1341.91	1986.92	1573.13	1434.59	2696.85	2070.47	1858.57	1829.94	1461.54	1065.74	1397.73	1333.79
X327	Indole-3-acetamide	4162.62	6171.63	5916.1	4748.08	6614.41	6384.16	7790.58	6326.86	4437.75	5371.92	6081	5222.54	5960.11	6173.37	5883.63	7080.64	7247.76	7312.19	9151.22	9475.25	10230.9	12180.9	10478.1	9612.56	7083.43	7875.19	8191.11	8790.43	9018.24	7296.71	7288.18	8689.2	8527.79	8311.61	7811.46	6658.18	4944.74	5798.69	5498.36	5243.18	5381.16	8444.72	9466.83	9248.76	6911.16	6648.4	6731.48	6309.56
X328	Urocanic acid	2899.62	9786.55	2212.28	2180.78	3775.28	6711.21	2666.35	5491.43	2327.82	5449.3	2311.05	3040.02	2425.04	2033.41	15441.2	2287.41	2927.73	2521.88	5022.47	5641.12	3108.38	4628.83	5793.32	2919.89	3303.85	2127.4	2017.37	3715.26	2702.45	2514.02	3715.32	1975	9784.11	3521.45	1623.01	12170.1	9108.27	3756.39	6632.51	3055.54	2220.11	3445.45	11039.6	10549.4	37325.8	22113.6	5041.84	5224.04
X329	HYPOTAURINE	6778.53	7949.23	11246	9517.64	8666.77	9342.7	5662.87	5257.49	7139.81	4814.66	6035.51	8165.22	4380.92	4390.46	4213.15	7133.86	9016.6	8707.57	4973.51	4798.23	6293.39	9189.98	4700.74	4478.78	3778.97	3958.35	4013.65	3800.47	3942.89	2995.54	3022.92	3662.43	3613.43	5806.64	5627.21	2596.69	3130.23	3283.93	3307.68	3153.66	3361.61	3674.74	4927.57	5119.15	5856.69	6396.67	7499.69	3421.37
X330	CYTIDINE	782886	743391	862962	883812	675789	623078	672407	821286	853879	695726	837475	970321	613742	647241	647463	661718	745655	739489	559056	519687	352785	465059	464986	431666	393986	412793	494396	340815	378531	215840	282934	386870	426335	366008	342685	343851	699802	801051	709147	673885	665227	502971	514949	519277	411526	415510	527048	488280
X331	TAURINE	557672	435220	432388	356994	426413	366984	296369	410259	500246	375493	420165	490973	281787	285258	286710	421359	465206	458621	385578	340737	323016	388019	422087	378139	264156	366213	408105	336040	317675	159385	177673	342900	332347	300462	290161	237644	327569	349627	338606	314952	316628	368302	409213	368156	372611	381366	442254	276856
X332	INOSINE	0	886.61	2929.21	191.911	13932.3	12922.9	107.733	0	0	0	0	84.5981	499.463	549.106	566.504	0	29.5778	26.8564	371.773	0	2430.77	2979.81	262.362	147.369	40.8618	0	0	2665.38	2967.16	272.151	455.583	35.1459	0	0	0	21.8272	274.543	308.465	246.457	291.287	212.009	0	1386.51	1593.98	190.32	67.8825	76.8543	285.605
X333	N-ACETYLGLUCOSAMINE	33358.1	22556.3	31829.4	33696.6	21570.9	21410.2	36766.1	28403.6	30019.5	22636.2	24791.3	36346.1	28220.8	28303.9	29402.6	31978.6	32668.3	30503.8	14581.3	13781.1	11432.3	14658.4	15419.2	13382.9	11315.6	13354.6	14463.2	18011.7	18044.4	10764.7	12158.4	17191.4	17314	14118.7	12685.4	9694.64	17930.6	20800.7	20078.5	17877	18006.3	20456	21989.5	21595.3	18749.4	13975.3	15909.4	13660
X334	PIPECOLATE	28487.2	26807.3	28181	24724.9	24757.7	21442.1	34023.4	24255.3	32154.7	22020.2	22569.8	20832.7	27831.2	30425.8	30916.9	19281.7	23898.4	23494.8	43026.6	35832.3	29526.5	39230.8	51044	43410.8	32065.8	41447	45529.2	21664.4	19274.1	32351.8	31218.8	44109.1	43826.7	29232.1	24736.2	8358.92	30530.5	40146.6	36394.7	34352.2	33647	27508.7	23687.3	19796	24275.4	22080.3	17703.2	28298.2
X335	XANTHINE	3277.97	2727.38	2426.89	3151.95	2220.36	1687.9	3125.46	2846.48	4216.3	3017.13	2780.8	3807.07	2543.65	3004.55	2693.91	2877.99	2726.5	2587.53	1092.62	732.603	1016.36	662.482	1245.23	1147.14	2650.29	1950.45	1259.41	838.918	1277.53	656.113	609.618	2644.21	2854.55	1018.44	883.653	3639.62	5558.86	6147.98	5337.26	5243.29	4808.36	4973.38	4795.91	4104.33	3800.65	3276.88	4169.49	2991.86
X336	ASPARAGINE	26207.5	24825.8	33912	35700	29613.6	28248.4	36197.4	34219.2	27314.8	32872.5	34871.9	37860.9	32017.2	34985.2	35605	31125.2	35331.1	34870.2	36088.6	36558.8	30976.7	42595.9	36104	33097.9	30753	38944	41038.9	48624.4	44154.9	33217.8	33428.4	27621.2	28797.6	31004.9	29522.8	16813.6	18915.8	20302.7	19495.4	18766.6	18626.1	18682.8	18211.4	18378.8	17441	17809.7	19555.6	21134.9
X337	VALINE	2.72316e+06	2.6731e+06	3.16935e+06	3.07497e+06	2.90273e+06	2.62423e+06	1.51399e+06	1.72946e+06	1.44515e+06	1.6752e+06	1.71727e+06	1.93309e+06	1.33986e+06	1.48666e+06	1.53144e+06	1.57248e+06	1.73362e+06	1.70185e+06	2.71591e+06	3.5881e+06	1.79519e+06	2.20331e+06	1.81628e+06	1.76092e+06	1.58599e+06	1.9704e+06	2.19224e+06	2.05727e+06	1.85742e+06	1.12844e+06	1.23716e+06	2.07631e+06	2.15231e+06	1.66708e+06	1.48778e+06	1.1595e+06	1.50447e+06	1.69888e+06	1.5497e+06	1.5464e+06	1.50692e+06	1.25382e+06	1.26645e+06	1.21846e+06	1.51011e+06	1.38943e+06	1.42201e+06	1.28795e+06
X338	PYRIDOXINE	111.458	94.3771	124.487	133.723	131.267	131.377	159.226	162.847	69.1029	121.793	133.71	164.29	93.5884	99.6601	126.084	119.957	104.96	119.426	170.939	114.861	166.953	189.163	185.464	113.313	178.079	192.677	257.89	290.879	260.99	92.8567	98.0803	179.359	195.613	130.653	87.6871	73.8158	89.7754	47.9465	54.0659	62.1766	51.4403	51.8606	55.5747	40.0253	41.5287	42.5	40.2682	47.9953
X339	DIETHANOLAMINE	424.344	412.773	265.667	177.952	235.002	421.351	266.826	348.585	285.901	443.537	508.55	827.118	116.217	243.849	210.704	123.284	515.141	310.251	581.304	1534.31	262.77	403.166	240.292	182.714	392.597	291.519	188.189	423.228	392.997	283.507	261.927	170.309	485.113	288.471	136.107	306.266	288.045	261.597	130.802	269.382	152.837	372.585	221.488	639.63	243.701	241.251	197.317	124.772
X340	GUANIDINOACETATE	6173.25	5750.78	7141.98	7423.43	5597.92	5721.58	5961.4	8569.46	5616.88	7578.69	8563.23	8684.9	5841.14	6577.84	6852.1	6042.85	6513.66	6667.17	5374.22	6896.88	3396.23	4195.07	3419.72	3198.63	5045.72	5778.33	6536.97	7491.1	7179.17	4999.14	5857.22	6808.22	7207.92	5090.31	5266.99	4030.31	2956.24	2971.72	2757.67	2757.92	2911.89	2997.16	4365.3	4498.22	4696.3	4814.26	4943.15	5145.25
X341	CREATININE	122225	91178.5	103619	122183	95866.2	91577.5	85898.2	92531.1	81813.6	85899.1	91078.6	88407.6	71494.7	70745.2	71572.4	88814.8	92464.4	90671.5	118038	131899	124571	157385	143245	137365	119998	126996	124814	112100	99228.2	92693	125487	157105	162198	129874	115511	86610.4	129997	138678	131959	131402	142927	81264.3	109467	100717	114103	116991	120230	104976
X342	DEOXYCYTIDINE	693309	808936	818987	985811	846440	825365	743481	841168	813254	749476	843934	890940	617406	653437	699380	688676	734584	736259	769171	849047	676420	867683	868021	821858	599391	789171	819371	822688	713584	569991	654735	973440	1.02884e+06	718715	687633	687100	806781	879874	820794	808954	785506	1.10457e+06	873673	809338	699350	710041	728079	735245
X343	GLUCOSAMINE 6-PHOSPHATE	6354.32	4058.23	7675.47	6528.62	2828.56	2541	2276.04	2918.02	7749.78	2790.28	2570.97	4411.03	2857.17	2998.45	3148.82	4287.1	4532.91	4846.1	1540.25	1097.24	1626.6	1618.84	2888.9	2420.86	1134.57	1172.43	1707.59	1595.79	2030.4	640.161	609.826	1183.8	1336.37	899.565	786.782	4124.2	4631.98	4194.73	4381.92	4420.82	4733.05	6982.13	6470.32	7199.08	4297.65	4556.72	7388.98	2974.94
X344	TARTRATE	9992.78	7622.15	8632.61	9476.94	8719.6	8497.8	7814.31	8057.61	8208.21	7774.35	8632.32	9969.57	6295.48	7466.99	7761.69	7649.4	10027.6	10068.5	8318.44	8629.46	7112.26	11485.1	9550.33	8701.13	6759.84	8410.78	9062.4	10087.1	9286.42	6473.58	6011.79	9172.31	9792.09	8387.18	7257.56	5088.93	6140.76	6503.84	6245.17	6054.63	6229.17	6313.17	6538.46	6533.26	6147.01	6014.62	6347.53	5612.88
X345	LEUCINE	802814	687918	761904	704394	735870	687424	949236	744938	560796	662467	689201	764080	708662	756670	771551	680487	739881	729141	617875	580607	587552	755294	683306	629255	692794	840127	922266	1.01322e+06	927314	589597	698671	613518	642479	803559	739569	464365	622580	706063	655001	618589	584221	523412	675872	684445	573604	597911	680348	585626
X346	1-METHYL-L-HISTIDINE	47208.9	26962.9	37049.3	46614.7	31997.1	28067.3	41001.6	40794.9	28477.3	38467.1	36781	43779.1	27520	31225.2	35660.6	38091.4	42559.7	41426.6	51937.8	49874.4	68605.5	103884	74947.1	68217.8	51200	65182.1	76037.8	56177.1	50503.4	28440.7	26620.1	69696.8	74034.9	35221.4	29683.5	43210.2	53379.9	57255.5	54153.2	53034.7	53459.1	31610.3	42377.4	45704.3	51765.5	53522.5	62163.1	51535.3
X347	ARGININE	870143	645365	768786	789000	661876	555364	681974	741573	565743	715756	758641	780114	580985	659820	668579	676817	717767	717532	678280	697286	516656	707397	656560	595861	491669	601118	648003	759028	671147	493072	538162	647594	672471	710844	570748	455932	553051	605955	574870	556762	517235	468194	506256	462628	497092	486831	581226	519757
X348	TRANS-4-HYDROXY-L-PROLINE	28551.8	32170.6	49887.3	67422.1	42589.7	49446.6	41407	32856.2	42070.2	43644.8	39907.4	50767	29469.9	39924.1	37613.3	18542.2	38159.4	35179.7	46404.7	40186.6	37535.8	65610	27652.9	29570.4	28265.7	25608.8	27646.2	30209.5	31249.7	32319.7	17168.5	20320.7	21088.1	16776.3	13292.3	7220.26	11036.7	11683.9	10538	11206.8	12441.6	5088.7	5764.85	6028.12	10376.8	11477.5	11828.7	10471.1
X349	N-METHYLASPARTATE	6586.9	13483.7	6568.75	8654.56	21107.3	16484.4	25020.9	24201.7	7356.65	24983.2	16670.3	11865.3	11989	14848.7	19675.7	12568.3	14487	15053.8	21046.3	19023.9	18513.5	23760.3	20274.8	20675.1	13843.2	13574	21411.1	26812	22462.6	8811.64	7501.94	10527	12046	10908.9	6095.58	7657.36	3731.07	2799.71	1818.38	2837.19	2504.48	8867.52	5657.91	4443.41	3043.3	3937.99	1632.39	5123.01
X350	CYSTEATE	302.657	259.539	287.42	200.31	228.665	266.968	219.256	230.099	212.131	223.019	228.033	281.209	203.799	244.688	224.416	250.262	225.734	245.986	156.187	183.228	196.529	192.617	214.025	218.024	193.455	199.492	191.754	174.288	211.502	178.551	228.532	150.279	174.145	208.053	242.3	266.692	233.343	238.519	210.832	244.577	218.159	196.089	237.53	250.293	226.018	227.021	223.884	252.838
X351	DEOXYCARNITINE	58338.7	57029.1	54323.4	58760.5	59819.9	56343.9	36522.1	56011.1	34426.2	53158.2	56780.2	59616.6	27050.7	30936.1	32043.8	37974.3	43172.2	42428.1	71102.8	72307	55628.1	75529	61119.2	57464	53930.1	69058.8	83874.4	53397.3	48102.9	33107.1	32261.1	53976.1	55151.2	36661.5	35679.4	22610.6	40131.6	44158.7	42083.2	41526.3	40865.7	18249.8	28004.7	28137.4	33116.2	34252.5	35268.9	32226.1
X352	MEVALOLACTONE	212.651	211.225	75.5815	148.905	122.142	252.64	50.6148	125.2	246.524	325.103	290.879	336.284	71.6715	169.604	99.9575	69.7783	140.023	296.774	262.816	424.494	102.907	223.456	194.79	119.635	125.402	129.485	101.52	202.347	128.043	87.8779	151.543	110.098	193.635	154.032	84.3956	147.476	123.097	79.269	84.4982	309.269	108.021	95.0295	118.444	101.886	77.028	205.223	211.132	91.0722
X353	L-CARNITINE	687148	548040	502775	562345	719441	785518	396015	583637	368868	643244	645472	770202	450120	511464	505027	465147	612516	646207	852779	769630	814185	1.09844e+06	860725	853238	643660	608262	617406	680607	671413	726770	568082	577333	596189	678813	613214	358667	468281	472783	467779	436190	498210	468485	394473	372480	472262	497082	512013	437426
X354	N-ALPHA-ACETYLLYSINE	1353.96	1339.16	1523.68	1373.51	1280.9	1023	2194.54	2417.37	900.439	1837.69	1971.48	1630.03	1965.31	1946.25	2139.8	1710.86	1517.92	1313.78	1137.39	1692.36	1143.74	1139.52	1204.72	1159.66	751.46	1061.82	1131.68	1799.54	1720.3	810.149	1377.1	1401.73	1469.06	1103.02	1043.7	495.52	844.67	902.416	706.741	788.62	730.988	767.604	455.593	342.726	444.737	445.723	381.409	685.279
X355	S-ADENOSYLHOMOCYSTEINE	1550.34	747.906	1004.98	325.272	935.386	787.393	488.951	831.276	808.518	744.911	730.871	941.199	849.743	821.737	907.044	714.298	1057.31	855.756	267.269	242.764	265.677	423.552	406.657	331.032	199.636	268.267	249.306	196.744	320.854	127.249	146.375	190.627	183.338	201.88	109.637	110.476	349.465	464.796	255.508	320.732	473.416	289.48	241.39	278.963	259.42	305.996	238.336	232.361
X356	L-ORNITHINE	15029.2	16051.2	22221.3	16320.8	18645.6	17713.3	13715.7	18022.2	13382.8	16870.3	16899.3	21005.6	12372	14196.1	18811.3	15709.8	19132.1	16966.3	18583.6	19236.4	14722.9	23976	19029.2	18063.5	12007.9	15629.9	16151.5	20263.8	18097.6	11771	10766.1	10898.5	11565.7	12662.8	11613.5	5976.95	11414.4	13307.2	12710.5	12467.4	17959.5	15190.4	11824.6	11020.2	15736	13808.2	12284.9	20594.9
X357	HISTAMINE	2745.12	1934.07	1917.77	1971.89	1820.18	1839.84	1531.62	1756.54	1487.74	1614.18	1800.81	1817.06	1856.19	1647.08	1618.86	1907.86	1714.66	1834	2318.26	2441.03	2461.17	2236.8	2251.78	2343.51	2256.35	2368.02	2406.7	2338.95	2237.62	1563.9	1725.08	1724.49	1742.76	1686.99	1769.09	2286.83	1971.36	1887.26	2040.17	1748.35	1522.08	1255.29	1923.86	2024.66	1615.44	1625.74	1803.92	1555.13
X358	DEOXYRIBOSE	23251.9	30719.5	30027.9	32907.4	30445.8	30919	27981.1	32534.6	32522.4	28889.6	32031.4	34221.5	29840.1	30022.2	30266.6	25545.6	26948.5	28772.6	25008.7	23980	21412.4	21199.9	24061.4	27331.8	25635	26549.1	26114.8	25982.2	24730.7	27150.3	32643.1	40310.9	41991.3	31505.6	33872.1	48656.7	45272.6	45337.1	46602.5	46340.7	47008.1	50822.9	47072.7	46702.3	43715.4	43002	44496.4	40193.3
X359	N-ACETYLGALACTOSAMINE	290.162	283.446	361.844	151.224	165.285	212.929	98.9604	131.465	102.603	117.949	122.726	120.013	123.857	102.802	148.985	134.011	110.474	79.7008	107.966	87.4406	87.662	67.2628	71.8223	98.4551	98.8228	74.4196	56.0001	59.1681	78.8936	71.9423	51.7691	78.2518	83.7984	35.4702	69.2545	73.9899	139.412	128.341	183.476	119.308	137.894	97.7465	77.4302	123.333	80.0433	87.691	87.7662	86.9897
X360	N-ACETYLGLUTAMATE	694.389	1020.58	123.42	1053.14	1984.41	1408.19	2885.45	2780.25	503.245	2698.06	1559.01	1163.37	1238.17	1914.03	2031.72	1363.49	1767.13	1684.95	2082.32	1569.93	1274.6	2020.03	2272.3	1951.54	862.043	1108.78	1704.16	2604.84	2205.48	539.663	363.044	412.678	805.052	877.704	208.351	951.625	523.796	221.805	36.9268	164.481	166.839	667.716	344.48	141.876	65.2432	59.8539	11.7437	455.089
X361	N-ACETYLCYSTEINE	1527.73	1430.66	455.255	781.365	1324.11	1208.02	665.126	1555.82	1533.56	1298.06	1037.53	1059.27	594.489	617.984	785.791	845.267	801.035	750.498	1477.15	1506.04	2815.28	2675.88	1903.55	1541.05	4907.31	4303.15	3988.85	1775.55	1222.34	393.054	469.203	2769.11	2566.21	699.241	528.446	7177.7	9350.34	7963.36	4943.02	6159.68	5606.2	7623.47	2416.46	3293.29	5051.14	8731.53	7129.34	4248.86
X362	PANTOTHENATE	12006.5	10489.7	11005.4	9335.03	8575.64	8445.12	8989.29	11584	7739.24	9975.87	10285.5	11008.1	7129.17	7460.11	7753.53	6899.86	6705.09	6826.25	12341.5	7257.53	9623.52	13032.7	9629.73	8055.31	6053.86	7618.6	8974.74	7288.3	6388.08	5447.07	5806.24	10436.3	10836.1	5952.49	5741.24	3986.13	9382.2	11047.1	10266.2	10226.3	10372.4	4843.97	5482.29	5033.51	5461	4123.53	4159.88	5507.84
X363	2-AMINOISOBUTYRATE	2760.76	4001.32	3811.06	3379.2	2625.71	2572.44	4966.65	4802.69	4567.73	4189.62	4580.61	4582.32	4283.7	4373.73	4569.46	3417.59	3808.04	3373.99	4368.57	4472.98	6751.05	9099.97	4633.31	4478.93	7576.98	9023.74	9227.07	5470.34	5079.41	4421.62	4608.08	9143.42	9391.29	3665.35	3467.66	5833.3	5375.84	5999.32	5606.95	5521.22	5522.58	26031.2	8836.67	6829.69	5047.63	4776.43	4809.37	8202.93
X364	HISTIDINOL	3317.68	2415.08	2865.9	3149.05	3027.7	2729.63	3532.04	3430.89	2566.44	3275.91	3497.05	3311.28	2655.9	2908.09	2856.15	3099.19	3478.43	3369.66	4755.59	4692.19	6390.74	6369.13	6337.52	6330.15	5884.47	6899.94	7215.98	5134.42	4761.4	3816.82	3444.43	6320.57	6887.82	3715.04	3735.99	3066.71	3655.42	4028.12	3837.7	3844.2	3935.45	2434.47	3216.22	3193.18	4328.86	4354.74	4551.65	4456.75
X365	3-METHYLHISTAMINE	180.376	98.428	144.151	168.672	111.085	122.37	132.593	135.576	137.523	135.028	130.604	181.533	116.736	122.982	141.555	160.513	141.083	139.638	183.251	195.066	247.433	409.679	256.424	257.439	163.173	205.783	238.36	185.073	191.799	86.1665	71.2787	236.301	204.034	122.545	87.2652	135.633	204.847	179.165	198.539	182.006	178.733	104.398	148.624	170.486	152.308	193.879	240.827	186.817
X366	D-ALANINE	60683	42743	62704.6	55130.6	56935.1	60895.8	70182.4	50628.6	41441.4	53294.5	57276.3	72674	49260.7	57625.4	56856.4	38987.5	55041.7	52830.4	59917	49044	53206	80165.4	59153.4	59952.3	51035.1	58036.6	59906.8	81083.4	79461.5	70855.1	55915.2	42983.1	44244.1	49409.5	43262.1	19461.5	30599.7	32180	30219.4	30936.4	31776.8	23276.2	25419.5	26647.8	21390.3	21639.9	24180.4	27098.1
X367	HISTIDINE	117038	87092.1	122107	119464	67294	59660.3	99344.4	104556	70748.3	96305	96883.6	112567	71475.8	80658.1	94321.9	85893.1	94420.5	93789	98227.8	104990	76315.5	114537	99111.1	90270.6	71066.6	94624.5	106892	126987	116318	70107.2	55023.4	53856.8	57493.9	67935	61147.8	51334.9	60587.9	66597.3	64846.6	63048.6	64582.5	54257.3	63455.8	66699.2	59799.3	55448.5	64510.7	59814
X368	ALLOTHREONINE	10526.4	7831.78	9269.82	11033.7	9436.99	8553.26	10837.2	10920.5	7642.12	10019.3	11604.3	10533.6	9672.14	10563.2	9895.93	8396.35	8915.01	8837.19	8319	7782.94	9853.47	9032.54	7454.92	8212.65	7138.14	7272.75	8291.31	12196	11719.8	8109.88	9407.7	10341.5	11852.1	8261.87	9760.69	7662.29	8154.06	9548.98	8413.76	9803.55	8996.97	8723.84	8145.47	8262.2	7323.17	7177.47	7381.35	8440.61
X369	ADENOSINE DIPHOSPHATE RIBOSE	0	205.679	1161.69	61.3528	4904.26	4385.31	0	0	12.6905	0	0	0	95.6435	76.7697	108.204	0	0	0	49.0701	0	557.509	815.419	0	0	0	0	0	530.516	382.016	19.7607	45.647	0	0	0	0	0	94.9557	88.5321	116.821	94.6652	114.646	0	260.321	377.045	14.38	0	0	74.7565
X370	5-HYDROXYLYSINE	372.845	460.842	640.66	744.192	380.459	331.826	400.665	408.464	513.834	359.584	389.746	506.512	321.177	386.035	359.026	367.445	446.917	429.038	252.216	302.345	231.497	414.023	242.659	247.302	197.567	229.713	263.767	262.719	243.805	122.621	140.91	232.75	224.712	167.662	180.906	71.1989	143.932	173.107	160.656	155.877	189.455	90.2564	99.0694	86.9124	127.038	126.375	119.9	129.435
X371	OPHTHALMATE	92.4448	154.564	144.556	39.1004	87.6161	36.3721	346.53	135.505	189.177	112.787	162.642	210.888	219.146	227.842	274.532	132.169	127.727	186.107	99.1199	77.746	221.509	225.899	124.459	141.794	231.531	288.706	360.971	59.2731	65.3734	101.127	100.936	276.683	305.587	39.3736	25.9006	106.009	113.264	131.525	102.335	127.843	140.53	610.593	221.329	155.798	85.1026	80.6421	72.1711	378.097
X372	TRIGONELLINE	200307	273019	308557	218132	238368	210690	10965.1	6666.11	1814.03	6469.65	6342.05	6854.58	3377.58	3841.7	4648.89	2622.02	2852.27	3889.89	150671	199720	56192.5	66925.2	78069.7	72380.9	2240.93	2702.12	2854.06	2051.75	1558.28	23198.8	26510.9	45324.4	44658	32964	29548.7	1940.89	30574.1	33885	31379.9	29980.7	29927.7	2031.79	4939.72	4842.12	6495.94	4486.35	1349.52	1683.03
X373	EPINEPHRINE	55.3627	77.198	45.7392	65.9419	71.5262	68.3518	109.162	105.612	65.8648	85.6436	80.6029	104.853	60.5625	74.807	104.965	84.036	80.415	82.7054	168.154	137.001	143.332	147.308	179.424	155.341	229.889	207.558	256.303	212.96	192.192	64.9861	107.519	125.162	58.9916	87.4139	46.8143	126.546	147.798	105.045	69.0087	92.0569	115.391	119.67	133.002	125.122	67.7539	120.935	142.213	123.52
X374	4-HYDROXY-L-PHENYLGLYCINE	54.8559	245.259	277.586	140.703	44.1206	13.617	441.133	335.43	98.7198	279.115	365.331	345.755	251.414	265.02	236.91	283.972	294.447	281.34	145.71	203.967	182.451	290.454	172.035	107.692	126.373	108.468	121.143	137.708	100.2	208.692	374.348	354.375	364.626	205.489	232.802	131.21	229.831	251.998	218.6	206.614	167.797	195.911	148.565	134.576	134.475	121.655	97.6151	152.447
X375	L-TRYPTOPHANAMIDE	1703.27	1235.4	1476.01	1272.69	1055.23	982.742	1411.8	1196.58	1095.91	958.214	1167.23	1238.44	1202.38	1194.95	1105.52	1016.03	1081.68	1093.09	1420.02	1437.08	1496	1727.21	1616.04	1356.31	1073.93	1168.96	1209.97	1341.07	1264.13	1056.56	1237.36	1356.92	1249.14	1103.87	1216.21	1032.82	1223.06	1342.86	1420.85	1412.12	1238.92	1297.68	1532.29	1404.07	1192.37	1199.49	1340.36	1299.65
X376	2-HYDROXYPYRIDINE	212.404	205.509	289.399	280.51	267.855	284.33	95.064	131.126	151.523	154.07	133.425	143.216	108.981	112.86	117.988	131.859	132.667	176.919	206.631	262.586	193.089	278.738	231.932	208.537	125.815	149.888	178.522	135.453	176.721	112.927	108.762	103.08	108.206	160.333	152.213	99.334	126.19	144.903	143.104	160.189	123.148	81.2676	132.21	114.023	102.967	114.41	112.337	91.4262
X377	3,4-DIHYDROXYPHENYLACETATE	220.908	211.836	197.371	304.306	235.469	104.997	133.095	142.87	169.314	165.074	161.004	238.901	0	208.178	218.094	67.5107	90.3669	212.873	53.7131	103.745	75.3748	82.7932	101.053	114.736	61.017	128.179	262.172	223.27	44.3005	23.5582	353.678	167.602	110.596	52.0382	73.5134	164.688	38.4856	36.5274	0	16.8041	44.3111	22.1015	162.871	99.0143	24.5125	117.638	201.845	256.908
X378	3-METHOXYTYRAMINE	592.628	874.408	911.843	607.904	863.388	915.557	1110.96	884.404	543.034	660.862	894.379	719.327	822.494	848.239	909.057	1022.14	1139.71	997.613	1748.99	1739.28	2053.31	2491.9	1884.42	1582.13	959.903	1152.93	1272.3	1426.11	1329.34	1062.58	1074.4	1632.6	1650.99	1460.75	1427.19	954.209	696.054	808.953	728.554	676.877	662.243	1294.39	1490.73	1254.56	907.087	884.351	834.236	983.084
X379	DETHIOBIOTIN	291.81	285.71	315.027	309.72	297.592	397.007	258.52	295.151	238.492	274.106	309.216	308.598	208.621	221.999	253.676	233.898	179.908	191.984	335.455	296.875	257.023	235.022	243.15	262.395	257.809	234.372	263.468	212.29	221.822	289.062	354.162	359.343	356.133	388.92	354.934	375.41	368.076	393.942	438.661	410.854	449.035	301.95	419.168	394.057	460.263	422.3	411.803	359.955
X380	PHENETHYLAMINE	34.9527	85.5474	34.1212	69.9003	12.4991	75.3941	63.7497	82.9615	134.392	169.965	89.013	44.4057	76.6687	68.9236	803.598	74.5692	71.609	562.941	115.093	170.707	79.321	103.681	115.874	413.224	74.1264	28.6676	35.295	57.7811	57.3457	83.9644	507.413	245.085	87.7033	2865.3	77.0567	108.306	62.6032	57.0852	95.0931	222.313	90.8743	72.8512	57.4057	150.789	335.377	199.092	121.633	103.397
X381	1-PHENYLETHANOL	312.87	369.732	270.591	373.184	340.604	408.243	240.952	395.026	349.693	289.32	319.146	278.864	317.71	215.784	202.545	189.2	163.533	131.614	310.097	287.673	304.005	233.705	333.905	201.545	319.811	194.773	256.638	312.51	287.748	637.236	562.901	671	562.489	612.154	528.856	64.6123	50.0801	4.86991	0	4.75149	0	11.28	0	0	0	11.8002	0	5.06258
X382	3-HYDROXYPHENYLACETATE	96.084	56.3799	39.385	85.4113	78.705	69.9797	39.0719	100.764	64.2343	65.903	95.8394	90.8285	46.9819	53.9973	59.0208	50.6122	61.0503	86.3679	138.758	110.507	110.489	207.873	219.99	193.143	54.8029	71.6301	86.3045	79.9428	100.811	40.9537	54.3274	88.8131	118.5	74.5676	51.9419	46.6213	84.163	94.8967	111.572	91.5841	83.7877	50.8196	66.8525	50.0941	101.424	109.829	61.1112	49.2266
X383	3-METHYLADENINE	523.559	543.093	758.93	397.098	531.587	569.27	293.946	293.204	207.971	246.326	307.054	297.33	216.059	280.146	246.774	180.995	234.382	269.216	317.983	496.912	171.394	168.893	299.226	289.82	141.921	161.645	200.095	230.74	199.072	168.483	202.725	204.913	189.214	219.958	167.554	90.9976	194.489	233.041	290.225	259.487	220.984	127.452	153.812	153.104	252.283	245.08	174.976	107.935
X384	BIOTIN	7963.61	7960.8	7625.54	8156.79	8110.52	7629.01	8733.99	8147.93	6783.35	7294.61	7424.04	8169.48	7353.43	7432.35	7394.76	7916.47	8424.99	8037.28	7868.76	8977.46	6214.46	8773.03	8172.31	7955.13	7020.09	7938.09	8062.39	9148.56	8265.46	6217.19	8427.95	9087.22	8800.61	7930.8	7911.89	5558.5	6835.69	7635.93	7376.77	6866.8	7533.19	7427.45	8146.08	7922.79	7107.15	7242.04	6976.14	8005.61
X385	MERCAPTOPYRUVATE	267.816	261.818	75.0212	139.373	217.076	225.868	127.066	294.933	250.83	247.89	207.931	211.669	107.503	122.953	160.24	167.227	172.232	162.476	294.762	261.346	604.146	531.984	360.12	285.237	955.014	892.444	851.064	409.86	230.597	75.7034	83.4046	503.471	489.251	127.473	110.074	1119.61	1483.58	1320.43	781.199	956.278	957.845	1316.57	397.021	548.794	873.565	1585.18	1241.54	756.008
X386	ETHYL 3-INDOLEACETATE	942.333	981.099	317.762	756.458	847.263	780.349	441.505	1066.73	655.336	850.747	695.682	577.079	569.084	608.85	673.534	475.784	580.309	561.199	1192.89	1445.3	2205.9	2605.74	1675.05	1282.11	3141.23	2775.43	2513.04	1589.16	1053.25	522.447	744.994	2024.53	2001.29	735.775	563.597	4290.07	5303.14	4191.54	2497.63	3207.99	2874.17	4148.83	1332.16	1336.72	1792.55	3180.29	2412.3	2525.67
X387	HEPTANOATE	511.095	483.206	19059.5	309.858	3517.04	1127.06	550.359	4157.94	2100.31	1964.41	883.652	839.318	468.585	486.941	415.94	634.551	357.377	506.363	463.718	249.624	425.051	397.506	803.602	289.673	491.081	167.497	438.362	581.206	715.225	664.074	262.696	465.055	1684.86	756.088	336.891	924.465	1918.83	694.258	894.788	1495.94	1429.05	322.446	589.954	257.045	825.286	507.924	566.073	720.172
X388	ELAIDATE	252.431	88.0897	81.0567	216.48	55.7024	112.569	117.368	96.4016	59.7075	141.44	268.45	188.735	222.826	239.276	246.794	16.9861	50.7307	159.569	133.219	43.9738	236.926	105.16	52.4406	96.5291	284.877	15.5624	605.833	510.429	382.561	141.107	118.655	155.092	90.6772	196.569	79.8204	212.196	785.02	254.255	581.61	512.139	900.744	118.972	274.929	1242	402.71	108.223	185.52	156.124
X389	CHOLATE	24765.4	51831	41927.2	21605.3	50857.2	45353.6	8187.23	3110.65	44.7003	2438.52	2933.64	2645.18	104.637	58.4991	36.37	11488.5	11438.3	10881.3	40694.2	65342.4	4901.34	5755.81	57545.2	56529	18388.7	28084.6	26946.8	10154.3	10381.3	27.6993	46.499	998.608	946.709	37.4013	48.8712	72.6226	14159.6	16080.7	15583.1	14467.9	14160.7	32728.5	14172.1	8866.86	73788.3	67619.3	68192.9	484.157
X390	2-Methylbutyrylglycine	376.893	201.674	341.722	90.017	95.5159	93.1091	121.65	83.6731	160.071	79.7669	78.4387	87.0541	76.382	97.0098	96.3	75.3798	72.5333	81.6126	91.6334	76.8268	73.9323	94.9088	95.3973	64.364	52.6635	73.2665	93.2951	83.486	84.3426	81.47	61.2419	97.8857	103.145	98.7628	68.1576	30.6069	60.715	58.5781	68.8765	65.2571	53.9258	148.115	84.589	48.3914	120.399	99.2259	95.9078	34.7907
X391	4-Hydroxyhippuric acid	1015.47	1603.79	1468.61	1282.6	1547.54	1370.84	2228.68	1741.21	1190.44	1593.42	1441.01	1459.45	1647.06	1668.83	1560.76	1801.06	1939.9	1880.91	2488.12	2246.62	2605.83	2823.44	2466.24	2414.43	1847.35	1935.24	2106.43	2232.09	2165.69	1866.35	1602.43	1885.14	1982.87	1965.78	1723.64	2027.58	1497.66	1757.76	1428.59	1405.36	1449.29	2146.91	2518.34	2355.94	1654.77	1520.95	1643.09	1579.85
X392	Trimethylamine Oxide	19652.4	47112.1	82446.3	44076.6	59577.2	61064.6	2367.9	731.413	10282.1	570.837	743.946	741.019	3372.7	1916.17	2351.34	3074.55	2798.09	3641.86	17412.2	38417.2	1770.53	2152.59	53191.1	50936.7	3636.01	4666.1	5312.11	2543.7	2302.65	4161.9	4765.45	9613.42	9857.33	6962.12	6007.4	1967.42	1487.38	1635.49	1564.84	1468.02	1523.13	1403.66	2767.51	2656.57	4764.14	5433.91	5491.39	2669.95
X393	Glycyl-glycine	265.32	222.053	234.812	301.586	283.734	363.369	136.303	174.004	96.5303	282.835	215.316	287.309	132.314	154.37	162.39	112.434	194.648	181.985	294.594	261.677	206.651	271.591	181.624	212.142	195.491	177.309	188.877	194.795	231.251	199.365	115.987	90.1872	108.895	134.803	81.741	94.2422	109.485	89.9681	90.7521	112.694	100.754	77.6196	100.63	97.1508	105.317	112.409	113.068	85.2006
X394	Homocitrulline	3106.62	2779.27	2809.8	2442.43	2236.39	2166.89	5344.87	3358.04	6144.03	3033.77	3233	3310.45	5199.62	5593.6	6213.16	2964.73	3433.85	3188.63	2023.08	1679.55	1174.49	1751.15	1980.87	1847.94	1659.28	1777.87	1892.19	2990.69	2581.65	2887.4	3099.84	3401.06	3448.96	2579.91	2280.91	600.438	2056.18	2263.54	2151.66	1974.12	2074.08	1743.19	1154.36	945.651	1192.85	1083.7	1046.82	1664.7
X395	D-SPHINGOSINE	118.679	101.134	103.557	141.517	138.342	176.1	129.15	257.662	265.563	180.956	244.095	173.214	97.1955	142.918	175.374	49.8461	192.615	115.821	103.555	118.792	102.66	108.825	67.2409	68.7452	40.9702	41.0016	50.8769	90.4373	64.9344	77.9718	59.8067	97.6109	124.878	132.687	111.7	41.3806	124.8	164.895	78.8626	152.435	128.939	87.1258	165.004	33.3182	85.3238	111.624	105.687	85.8456
X396	SEBACIC ACID	1452.48	1120.36	688.285	790.153	1585.88	1534.33	996.169	1463.11	412.513	1158.26	1336.76	1456.5	653.838	694.845	745.482	1036.47	1134.35	1250.66	2062.79	1730.17	1270.34	1806.52	1858.43	1688.11	623.619	814.161	1113.37	1248.16	1239.11	1305.86	1512.69	1258.38	1253.5	1970.16	1899.16	407.551	1300.93	1444.33	1286.81	1209.83	1198.63	629.321	475.163	446.464	751.392	734.629	804.946	490.823
X397	ESTRONE	33.9863	68.8501	127.09	184.087	137.918	118.932	52.9322	102.58	140.531	46.5999	92.3038	0	95.8601	28.8102	0	51.267	29.1973	29.8102	226.15	207.173	133.513	184.461	164.093	226.75	86.3687	107.304	149.691	76.5398	81.8504	85.1132	0	235.866	310.308	33.434	27.3209	158.331	171.925	197.232	130.404	164.172	209.479	323.085	225.821	43.9279	136.687	132.56	102.376	110.658
X398	ISOVALERYL-L-CARNITINE	30541.6	31435.8	20466.9	24121.6	28866	27872.2	26642.8	48486.2	13875.6	41177.7	46861.5	47394.4	18408.3	18806.4	21094.7	32188.8	31907.1	32619.1	68093.7	45004.1	47699.2	55464.6	61433.3	58431.7	25984.1	29297.4	35073.5	31605.7	29389.4	33000	39166.3	46640.8	46396.4	58028.7	56229.6	16064.8	46262.3	51473.7	47960.1	46587.2	45096.4	28179.6	19283.9	16459.1	31813.3	28609.6	27003.6	18547.2
X399	octanoyl_l_carnitine	1748.45	1587.13	960.097	2083.52	1404.02	1474.72	1107.94	2642.15	1922.31	2048.53	2477.66	2540.17	1885.34	1838.85	1754.95	2187.61	2560.61	2575.96	2004.23	1724.28	2618.95	3953.4	2994.39	2673.71	3531.82	4256.46	4728.88	2173.73	2338.48	2565.16	3025.93	6513.1	6467.39	2922.94	2798.41	2508.33	3227.38	3578.83	3207.66	3127.36	3062.8	3538.16	3215.91	1985.62	3629.54	3832.29	4081.33	3179.84
X400	CORNOSINE	469.636	129.095	383.737	232.803	143.587	137.545	251.95	149.39	361.59	154.558	184.367	212.809	135.461	131.603	172.813	239.914	285.151	222.443	1414.01	270.808	536.695	669.521	484.123	393.658	492.936	289.286	336.687	548.29	396.472	216.044	155.162	232.906	207.293	640.644	383.632	39.9289	59.0566	47.6372	39.2606	40.4875	67.0424	15.9416	30.9399	41.8546	47.814	41.2756	67.6978	76.1845
X401	OXALOACETIC ACID	237.298	132.753	204.377	351.381	151.83	199.056	360.991	363.995	181.854	248.47	386.091	366.891	158.079	249.98	346.193	232.401	374.651	339.657	327.108	391.484	288.724	434.345	363.792	323.518	268.274	413.218	404.041	596.182	438.222	314.731	263.713	242.226	275.629	320.81	311.276	122.699	149.077	230.539	223.426	211.078	250.537	108.434	240.461	176.904	188.075	226.029	240.606	200.843
X402	PROLINE	887505	898164	1.05012e+06	980334	1.15732e+06	1.00876e+06	1.7113e+06	1.5569e+06	925730	1.41316e+06	1.44617e+06	1.39881e+06	1.17457e+06	1.26343e+06	1.27066e+06	1.1731e+06	1.43575e+06	1.39161e+06	992103	993401	921282	1.19739e+06	1.12402e+06	996006	781259	1.03927e+06	1.10115e+06	2.01316e+06	1.79264e+06	1.23047e+06	1.2614e+06	1.19174e+06	1.17755e+06	1.53749e+06	1.33356e+06	386855	427532	520058	485165	455258	441903	660401	685312	623809	465707	456994	413643	556514
X403	GLUTAMIC ACID	153371	136346	176440	177754	106605	100656	99385.8	94720.6	134997	92644.7	90584.6	130401	99292.7	106832	106487	116373	123265	121007	78552.2	70982.7	78398.2	99934.2	94735.1	87296.2	57086.3	63705.1	76097.3	74577.2	75113.4	34373.2	33798.9	55987.9	62480	43901.5	34545.6	92577.2	87430.4	92738.6	88012.7	86965.8	90626.6	96591.7	118520	123036	79227.6	79761.5	111236	93409.7
X404	CARNOSINE	628.209	588.747	624.284	645.9	628.69	588.402	449.662	531.104	324.685	501.7	610.037	539.834	382.98	444.852	440.565	403.04	469.533	630.07	814.474	1080.52	581.142	787.427	880.859	839.736	501.574	700.505	867.026	853.305	683.935	388.282	460.689	634.426	642.587	541.849	433.501	144.589	146.111	144.915	142.377	141.857	145.798	172.237	139.517	111.573	177.833	128.459	162.507	140.99
X405	L-ISOLEUCINE	8639.54	8818.31	8113.48	8291.5	8733.54	9006.92	7240.83	9049	9068.81	9150.18	9411.72	7581.8	9022.63	8650.66	8529.8	9583.98	8882.47	9050.57	6028.89	6331.91	8097.25	6561.91	7663.85	8760.03	8865.98	8476.91	7423.7	7587.33	8214.31	8117.15	9007.99	6185.45	6291.19	9139.82	10414.7	10967.1	10909.1	10823.6	11249.4	12196.8	11642.9	9898.22	12255.8	12844.5	11105	12164.9	13109.3	11329.4
X406	L-SERINE	36462.4	25363.2	29905.2	31463.1	27027.4	26583.1	25423.7	29086.3	27714.2	27232.5	28678.3	33738.2	21424.9	23777.8	26125.4	26735.6	31175.6	31520.9	27673.7	26160.6	24645.4	35157.8	29225.4	27429.5	23231.2	28568.5	30897.2	32791.6	30758	20983.1	20972.2	29060.5	30680.4	25905.9	24687	18334.2	21548.3	22803.6	21949.4	21116.5	20805.4	21266.9	21504.3	21534.9	19837.6	19576.3	21020.9	20963.9
X407	GLUTAMATE	197.725	113.618	172.038	143.81	103.276	97.2322	62.0714	106.752	159.404	113.559	105.23	104.586	114.736	99.1847	115.443	108.306	97.1374	133.892	106.575	112.955	79.9532	120.792	143.332	133.981	118.802	76.9812	97.0564	90.7177	73.9544	45.8322	50.4443	102.13	81.6796	72.8191	55.1901	73.6911	76.8963	96.6168	77.4393	92.1972	87.8817	63.2636	58.5407	66.2214	58.9242	67.5518	72.7898	68.1507
X408	1,4-Cyclohexanedicarboxylic acid	1366.05	1547.73	217.413	1367.78	2498.19	2018.51	543.462	1359.88	378.069	1320.8	655.823	542.157	441.141	583.769	720.98	322.236	367.053	429.878	1374.57	1442.15	4329.81	4417.33	1965.93	1158.67	5951.63	5831.73	4907.44	1218.29	877.838	608.553	540.711	3978.91	6767.02	907.141	347.477	4115.87	6392.5	2403.84	2110.35	1780.01	1527.75	11123.5	419.468	554.996	921.071	3461.13	1914.71	6452.06
X409	2,6-Diaminopimelic acid	1552.34	1431.46	1786.99	2453.68	1828.71	1695.56	456.49	526.97	327.796	463.976	436.876	564.914	266.91	302.792	257.232	357.021	419.95	374.133	1664.74	2292.96	1758.8	2139.69	1739.33	1288.75	386.758	448.503	515.219	365.853	369.55	306.085	322.548	713.667	659.176	300.274	306.856	174.447	1078.13	1248.49	1212.39	1144.17	1132.11	373.193	298.983	274.393	336.61	352.915	350.548	318.252
X410	2-Deoxyribose	1143.44	484.939	959.727	827.516	1029.42	825.457	457.923	455.394	265.772	691.338	344.816	649.449	248.444	620.821	766.899	354.725	379.795	706.23	568.248	654.987	667.706	740.236	515.088	479.608	587.293	469.45	822.034	360.729	496.479	641.803	467.144	965.056	837.446	363.483	353.946	562.52	1081.31	1393.53	1216.36	1127.26	1191.71	525.952	597.289	590.153	675.63	699.316	794.038	442.431
X411	2-Hydroxy-3-methylbutyric acid	4772.35	4605.93	4558.76	5155.11	6286.4	5981.18	7005.16	6122.32	6614.15	5609.97	5017.58	5673.65	5539.83	5710.08	5469.28	4788.06	5046.46	4917.5	4130.76	3858.37	5126.14	5735.31	6524.95	5757.1	5987.08	6821.05	7718.79	6868.46	6698.21	6235.16	6035.55	9047.96	8894.11	5845.67	5666.78	4673.02	6319.06	6789.23	6275.44	6149.55	6083.05	14215.8	7614.62	6221.22	7363.57	7899.79	8498.55	5802.11
X412	2-Hydroxy-4-methylpentanoic acid	3007.99	2719.74	2889.45	3232.3	3464.75	3234.79	1928.36	1700.74	1985.44	1390.22	1392.57	1606.99	1584.45	1657.21	1583.62	1629.43	1565.8	1549.22	2105.22	1886.48	2026.62	2250.28	2729.18	2474.34	2297.81	2522.78	2840.01	2079.15	2154.57	1575.07	1586.03	2498.09	2650.33	1735.75	1598.29	1677.99	4493.63	4676.22	3951.16	3786.04	3925.27	3551.31	2831.74	2528.27	2623.1	2826.45	3426.74	1634.27
X413	2-Hydroxybenzaldehyde	1873.56	4692.9	2375.98	2724.38	3865.96	2888.42	2497.37	2140.05	2723.84	1590.56	2034.84	2303.14	2353.57	2042.29	2771.1	3130.63	2232.54	2304.04	6541.22	5602.64	6293.99	5165.54	6884.72	7023.33	7220.06	5954.14	7782.88	5416.54	6456.54	3968.81	4623.14	6587.31	7598.92	5945.77	4255.46	9198.46	7916.68	5943.76	5943.22	7179.03	8824.75	9017.65	9868.58	6753.24	5540.34	6994.19	7619.31	5235.14
X414	2-Ketogluconic??acid	5902.76	4029.4	5343.64	6235.78	6570.19	6443.36	3709.72	3980.9	3559.38	3318.19	3002.44	3723.11	2623.7	2722.55	2651.71	2697.51	2911.56	3167.2	3708.03	4062.99	4274.79	4887.24	4472.7	3425.48	2179.06	2651.27	3090.87	2925.4	2714.32	2947.35	2687.67	5063.21	4740.92	3013.57	2877.66	1779.08	4436.92	5396.43	5221.44	4822.7	4881.2	3920.55	2990.07	2512.61	3589.86	3479.58	3372.54	3651.56
X415	3,4-Dihydroxybenzoic acid	1716.94	4109.59	7805.84	5053.8	4773.89	4356.63	63.0728	68.6266	11.0968	81.343	34.9978	40.2992	20.0847	37.4596	9.97074	16.2593	5.34277	7.53307	1056.94	2003.69	302.812	337.068	242.617	304.835	74.9071	93.2348	75.4129	90.1574	58.919	56.2339	106.416	157.058	112.573	62.2514	104.636	24.6172	84.1023	70.8691	91.989	113.78	81.975	34.5898	53.9547	43.1032	28.3686	54.4221	39.42	46.4723
X416	3-Guanidinopropionic acid	13073.3	6931.32	6185.77	6526.62	5878.46	5970.46	2171.81	2661.83	3077.94	2391.33	2197.43	2704.4	2192.71	2271.55	2131.26	2825.63	2921.99	2953.18	16076.1	10234.9	19159.4	21723.2	14372.3	12040.8	10106.9	14742.2	16156.5	2528.72	2456.46	2357.81	2374.41	7053.59	6534.21	2604.92	2399.08	4040.02	16945.6	19155.7	17974.4	17688.1	17952.4	5533.59	6473.49	6182.81	5524.7	6297.06	6828.97	7962.91
X417	3-Methylhistidine	2923.05	1752.06	2120.16	3339.57	2754.21	2729	3675.6	3351.54	2143.59	2990.98	2847.71	2998.65	2561.37	2666.31	2536.12	2845.54	3173.97	3123.89	5149.67	5319.06	7784.62	9957.28	7763.52	6360.33	5312.82	7415.65	7789.32	5618.5	5039.6	4515.1	4457	9818.57	9142.18	4543.75	4827.64	4765.19	6819.9	7801.58	7351.2	6957.05	6815.59	3987.98	5478.37	5346.11	7186.81	7805.13	8025.32	7668.37
X418	3-Methyluridine	3001.83	3214.82	4964.06	3835.59	4338.01	4389.95	3090	3050.08	2666.17	2400.46	1891.13	1974.32	2050.68	1997.59	1968.62	2468.38	1874.79	1591.91	1775.66	1856.14	1608.68	1777.02	1838.27	1423.18	1052.34	1016.48	1073.49	1299.36	1152.77	1127.33	941.801	1227.49	1210.65	1247.62	904.813	1378.48	3267.05	3821.86	3297.04	3183.82	2587.24	5251.55	2218.02	1542.98	2293.39	2358.8	2048.86	2234.63
X419	3-Phenyllactic acid	3930.68	2649.93	3268.37	1605.06	5148.91	4878.96	324.788	540.901	359.738	549.82	519.351	618.126	218.925	507.199	623.647	323.911	432.874	701.338	1001.23	1525.85	567.828	660.03	661.796	657.809	506.475	547.606	703.072	895.134	696.292	3152.51	3093.6	3767.44	3682.89	3156.06	3042.08	427.551	510.96	620.483	521.141	578.699	669.104	601.945	600.394	472.296	459.31	577.428	652.331	551.68
X420	4-Hydroxybenzoic acid	317.751	834.237	1896.38	379.112	790.797	779.876	114.857	448.679	200.075	269.696	153.096	254.631	60.9701	48.19	93.9634	116.546	112.762	98.3359	339.966	495.93	282.414	317.396	309.559	313.046	149.338	160.196	156.761	102.381	130.585	170.062	184.5	216.731	293.063	331.869	322.286	167.198	238.563	257.897	190.241	218.513	229.153	121.945	244.487	156.623	116.192	98.3153	98.7806	101.672
X421	4-Hydroxyphenyllactic acid	5431.59	4065.8	4506.88	6258.19	4566.99	4267.45	8406.16	6752.91	5748.91	5475.08	5536.06	6257.07	5185.1	5380.19	4915.58	5339.34	5941.09	5597.64	5593.3	6840.49	5405.26	6968.43	7375.92	6457.88	4850.16	5800.47	6229.11	9584.86	9538.6	5867.73	5998.96	6134.54	6513.76	6064.13	5511.43	3783.95	6178.86	7038.21	6117.26	6051.13	6000.86	6850.96	5640.89	4635.13	5498	5869.95	6428.52	5127.11
X422	4-Nitrophenol	1344.13	780.223	1383.34	1439.17	1531.88	763.68	1801.88	643.001	534.306	1146.01	858.128	3679.56	136.271	1414.02	1805.65	947.283	523.951	1837.18	505.901	1121.76	569.85	763.456	1307.87	773.869	583.4	1603.51	1218.99	1440.79	567.698	791.48	2008.57	980.811	484.551	402.694	490.092	537.693	167.997	194.998	276.464	198.186	1551.88	412.348	1207.83	1256.05	530.075	583.397	501.147	317.06
X423	4-Pyridoxic acid	104.98	145.46	212.752	156.23	186.335	195.819	267.502	3759.3	2426.01	187	91.8777	121.288	707.07	147.247	137.662	159.751	138.254	225.054	180.737	274.184	133.889	190.29	268.526	181.205	136.036	189.747	268.589	209.433	209.129	169.744	163.929	230.797	170.135	176.075	160.964	536.346	490.658	471.29	493.418	462.905	530.726	135.461	730.829	574.644	531.776	637.448	599.933	384.826
X424	10-Hydroxydecanoic acid	1002.98	1520.54	2567.11	4881.57	1548.92	1394.66	935.753	1549.84	1288.34	1426.85	1811.31	1515.27	1772.08	1906.67	1827.36	2288.94	2562.37	2411.22	2168.54	3584.21	4350.96	5447.8	4213.21	3638.71	1803.91	1757.39	1832.6	2078.26	2269.2	2736.49	2854.49	8424.79	9618	3200.84	3399.29	1248.15	3109.95	3596.8	3370.57	3229.49	3126.39	2604.69	2704.11	2027.86	2166.44	2253.31	2592.68	2637.69
X425	Acetylenedicarboxylic acid	522.951	638.353	601.142	696.963	628.818	591.173	617.268	606.696	535.698	479.282	402.812	486.748	667.389	568.293	541.871	634.144	631.363	472.634	634.504	577.341	589.419	656.749	525.321	521.291	768.236	832.789	824.912	555.779	510.036	499.39	509.334	953.647	1105.22	772.419	571.779	607.115	1115.69	1049.07	985.88	930.935	1054.6	505.395	536.397	462.568	837.045	647.829	695.568	771.129
X426	Aconitic acid	2421.16	2589.1	2696.22	6157.05	3732.02	3116.33	4048.67	4173.97	2540.29	2930.79	1925.24	3293.95	2937.57	3047.18	2725.25	3602.57	4234.12	3502.1	3052.81	3336.6	5037.15	5407.68	3538.21	3538.52	3488.69	4797.61	5649.55	4455.94	4712.49	2813.63	3807.04	6569.89	6137.33	4511	4240.94	1694.87	3520.75	3821.57	3549.47	3740.32	3442.28	3489.32	2633.79	2663.03	3211.3	3428.55	3661.93	3336.61
X427	Adipic acid	488.44	436.018	363.071	637.097	681.925	605.34	625.591	531.738	361.697	416.703	326.242	417.742	381.625	404.686	381.201	337.937	335.853	372.629	467.409	698.437	630.747	723.459	671.722	431.927	587.075	678.976	782.069	616.162	550.662	492.909	440.149	1125.61	1168.65	531.562	427.357	266.715	404.646	455.216	326.775	372.641	330.045	171.569	359.287	319.276	352.793	343.197	310.791	334.722
X428	Ala-Ile	1480.76	386.84	289.624	233.758	788.137	788.555	724.311	988.513	400.37	774.254	1082.39	568.984	603.032	572.743	544.177	355.083	447.388	907.04	660.786	1014.53	744.505	1633.45	600.818	538.246	659.685	1061.52	1343.68	1044.21	705.913	780.786	723.61	929.413	847.524	652.281	557.804	159.59	173.88	149.048	217.413	173.251	58.8503	116.769	268.559	159.726	220.872	363.354	268.323	472.394
X429	Allantoin	70873.3	55730.9	58041.8	78960.3	68182.5	62048.2	60912.2	55327.5	48883.4	51094.8	44579.9	52415.9	45314.2	50868.5	48491.9	42806.3	50184.9	50858.7	60804.6	60083.6	65595.5	67140.6	71326	58053.8	39592.7	47676.4	56105.1	48267.4	47023.4	40769.2	38698.2	47831.4	51064.6	37683.5	38374.9	23178.6	58382.5	60335.8	56423.7	58956	50830.7	7834.22	34615.7	34738.1	34298.3	36057.5	35698.7	34170
X430	Ascorbic acid	1495.64	471.129	987.726	1016.68	643.004	690.474	855.154	934.484	1462.16	967.14	1034.91	1117.74	1075.14	951.163	1094.24	918.773	697.589	742.537	337.122	307.994	484.858	612.107	485.334	562.228	538.49	511.736	388.695	872.843	933.809	694.136	540.718	740.904	804.849	563.946	637.094	314.908	265.855	318.142	357.876	292.555	300.881	237.551	543.687	643.949	432.593	367.925	351.252	393.305
X431	Aspartic acid	30746.2	15997.7	18338	22040.6	17206.7	17135.1	14429.2	16829.2	21223.8	14537.9	11202.4	16805.8	13709.9	13763.3	13388.6	13517.9	14085.9	14211.9	10283.3	9900.2	9485.65	9515.13	12076.5	9127.77	5163.05	6033.86	7544.31	9023.78	9122.47	4631.05	4889.36	5338.43	5473.39	4564.49	4078.98	18278.5	21988	21488.9	22163.5	21109.6	19816.8	18664.9	24743.5	25667	18250.7	19289.2	21661	19828.9
X432	Cholic acid	39233.4	81155	74246.7	36088.2	83863	73821.8	16715.6	5645.65	586.934	5289.88	4833.68	5017.83	457.615	568.935	468.724	16825.2	18166.8	16898.3	63993.5	95643.8	8576.59	9518.64	83890.4	79319.4	28878.1	41628.7	40501.4	15497	15676.8	113.19	70.7154	2149.89	2204.06	297.066	285.866	366.803	25077.5	27785.5	27019.5	24012.3	24064.3	54704.8	23547.9	17783.9	121682	112320	109184	956.142
X433	Citraconic acid	1190.2	1219.17	1468.92	2012.51	1755.44	1530.48	1496.32	1428.52	1071.79	1147.55	842.649	1185.51	1085.25	1220.8	1038.36	1188.63	1353.75	1226.92	1364.23	1359.63	1724.75	2031.46	1546.21	1349.61	1078.62	1445.49	1724.77	1683.21	1619.03	990.176	1224.9	1873.03	1770.95	1306.07	1315.75	743.179	1289.77	1350.58	1246.51	1335.27	1286.74	1413.7	1192.54	1172.08	1210.18	1304.84	1440.28	1432.79
X434	Citramalic acid	2105.06	1279.26	1632.36	1779.84	1412.61	1487.87	1458.86	1822.06	2083.73	1823.34	1785.01	1797.72	1807.95	1825.89	1891.5	1661.65	1541.18	1545.49	1136.94	1037.31	1275.1	1443.7	1311	1377.33	1376.99	1362.83	1191.91	1753.19	1734.17	1527.68	1343.62	1566.73	1648.34	1386.27	1508.27	1121.28	1082.95	1059.79	1269	1051.19	1079.53	968.194	1353.06	1529.39	1214.16	1169.78	1259.08	1270.62
X435	Citric acid	25951.4	35186	29349.5	157978	91774.6	82342.1	101636	89440	38708.5	61773.1	23923.5	56268.9	34090.7	46465.2	38931.4	49870.5	67358.5	61423.6	26266.7	24573.3	27535.9	37694.4	27028.1	19550.5	21271.2	34984.2	46162.5	33349.2	30886.2	15399.2	17078.2	59933.1	50052	40950.7	26707.1	7333.66	29507.3	40707.3	33943.5	34014.4	39205.7	33437.7	21524.4	17702.2	36147	29459	33925.6	19905.2
X436	Citrulline	27353.9	26941.9	28034.3	30485	35931.9	35432.2	26672.1	28500.7	16573.9	24990.1	23851.7	25779.7	20640.1	21789.9	20084.2	21845.2	23116.7	22694.9	25805.8	34388	21568.8	25781.4	24119.3	20255.6	16699.1	22130	21171.6	25712.7	23438.1	20272.6	20597.1	17699.5	16292.7	18086.6	19954.6	14091.5	25523.8	27916.4	26502.8	25499.1	24994.8	19784.5	18822.7	17492.2	23462.8	24129.8	24742.8	20357.6
X437	Cystathionine	110.864	122.82	152.235	247.965	95.1456	110.8	332.396	319.677	76.3947	259.464	185.507	279.315	119.158	142.776	150.708	204.712	232.402	241.876	185.376	259.357	182.81	237.009	52.0329	18.4027	71.9962	106.219	111.871	89.015	87.7453	99.7271	114.938	222.401	182.069	117.929	117.306	38.5286	242.326	319.478	270.838	282.563	297.857	59.9755	59.721	40.8434	67.8893	66.8664	87.9018	103.147
X438	Dihydroorotic acid	73.4246	48.9258	103.299	103.67	59.7362	67.3791	79.3333	82.7656	82.0448	50.784	86.3854	105.434	17.7057	32.1283	25.7375	15.161	11.3623	31.2542	637.353	826.487	701.774	885.805	201.489	214.898	605.468	1071.95	1194.2	658.867	427.578	203.381	225.931	394.537	271.308	292.922	333.162	138.665	211.798	420.943	674.129	665.321	600.688	350.059	293.972	280.375	253.687	205.083	491.688	198.862
X439	Docosahexanoic acid	79181.4	74188.5	172233	51679.9	35290.6	36133.5	84158.3	97534.1	99550.9	89708.9	161627	102965	76239.5	57436.9	95055.1	82435.4	71095.8	45832	51298.3	43354.8	46364.1	32427.3	23558	23144.3	36578.2	29802.3	28332.5	31909	27870.4	29116.4	30808.6	85237	96344	50681.4	48418.3	27859.9	50280.1	40526.4	46222.1	51222.3	40864.1	95351	80132	38413.3	40752.2	54709.2	47042.2	29691.5
X440	Gluconic acid	17514.2	11854.1	11164.7	17859.3	23151.2	23173	27262.7	29794.1	22479.4	27014.3	18570	21665	16849.6	19809.5	19291.4	15110.1	18455.5	19492.8	20513.4	23811.7	16128.3	17064.3	17046.4	12967.1	18136.7	26068.4	31798.3	25312	23228.3	19490.9	19334.9	34393.4	29911.3	19493.6	18282.9	12269.8	24743.1	30088.1	28525.8	27626.4	30438.5	22525.3	19761.2	15233.2	25088.8	27829.4	29321.6	24440.2
X441	Glu-Gln	869.948	1115.55	1122.09	6640.29	4179.68	4248.68	8420.99	2845.54	442.257	2320.42	3463.19	1653.44	2490.54	2926.97	2967.98	2649.74	3327.98	3700.4	6595.57	10153.5	10134.9	13115.1	7836.99	6943.87	8586.67	11587.8	12516.5	7669.3	7086	7547.56	7692.9	9722.84	8815.52	7075.68	6813.13	128.804	219.509	424.281	300.771	282.889	184.544	153.256	173.509	149.836	144.693	214.279	96.2938	493.731
X442	Glutamine	177461	184399	208481	301988	223717	218437	233874	223973	167341	194546	176084	192186	159022	178820	162489	165196	190212	183495	284219	314183	257491	311743	249825	201015	224638	299064	331575	277973	252803	215858	211134	238585	222578	188953	188939	186963	192560	218923	206518	194176	192090	203600	208606	189830	214944	207876	192504	236979
X443	Glutathione (oxidized)	3314.92	116.246	75.4455	268.677	206.156	200.061	266.083	544.882	479.188	488.776	367.343	466.412	206.903	263.862	267.205	204.036	302.569	113.004	305.832	167.342	306.094	549.667	253.99	147.221	162.063	224.161	445.63	139.322	95.9577	94.9845	47.7243	255.431	162.217	134.545	88.2187	136.861	331.05	221.555	634.57	170.423	1181.12	201.705	58.2131	179.994	143.103	346.971	320.376	1642.31
X444	Glu-Thr	746.476	365.308	485.242	1317.65	816.81	793.892	1190.03	1211.46	433.597	905.12	877.116	1068.64	801.473	896.323	775.346	945.329	1072.43	1029.8	931.013	1048.52	1333.77	1630.93	1089.71	796.783	601.054	795.78	917.882	984.215	981.306	714.82	748.683	1357.38	1239.32	712.283	668.106	244.733	591.279	736.814	597.029	615.648	506.135	357.109	347.336	312.962	303.602	298.239	315.315	437.827
X445	Glyceric acid	27112.4	17538.3	17872.5	24414.1	24955.4	23197.5	23682.5	23356.8	22767.3	20742.6	14184	27899.4	25096.1	25332.3	24231	20899.3	23938.7	21593.6	21028.3	20167.6	23078.3	26722.9	20594.6	15767.5	17039.4	17581.5	21802.8	24938.1	23821.9	12924.7	12549.3	17942.5	17790.5	17546.8	14843.6	12218.7	17497.1	24008.9	20938.6	19937.6	21587	20180.6	21134.5	17130.1	19752.9	18677.4	20437.9	23510
X446	Homoarginine	1183.96	1017.95	1481.08	1625.77	1675.84	1619.01	2387.62	2427.99	1631.45	2010.37	1775.92	2175.21	2414.85	2786.76	2450.17	2166.72	2497.58	2428.01	1206.01	1669.6	1273.13	1749.47	1213.75	871.588	1026.98	1284.65	1489.23	1659.41	1548.58	1963.46	1900.08	1551.91	1479.98	1831.74	1752.4	699.796	816.461	897.502	834.105	717.939	799.661	1066.72	698.545	590.368	1193.75	949.021	1102.75	1508.2
X447	Homoserine	3112.52	4542.91	2822.07	6810.23	10617.3	9353.53	9121.75	9882.82	2790.88	8329.35	4489.06	5257.28	4837.28	6038.99	5661.76	4964.78	5186.05	6390.43	11429	10823.4	12340.4	13693.3	10434.2	8595.36	5317.08	7052.01	10802.5	11317	10765.3	3734.96	4252.84	5847.62	6034.83	5323.45	2828.98	5476.51	5433.75	4298.9	2308.61	3812.27	3311.81	5043.34	3729.4	2574.83	2107.54	3033.87	1584.24	4243.56
X448	Indole-3-carboxaldehyde	579.621	1333.02	1451.18	1302.1	560.101	468.718	2314.72	1966.23	573.341	1608.43	1746.15	2059.64	1450.79	1491.03	1406.77	1647.74	1706.04	1567.65	1156.53	1671.92	1145.79	1355.41	738.405	606.38	733.554	729.042	772.685	655.13	569.21	1375.57	1437.49	1285	1252.71	1093.76	1064.72	730.229	1737.39	1979.36	1887.88	1861.22	1779.04	1562.73	1146.5	1020.83	812.158	850.87	866.444	1188.34
X449	Indole-3-propionic acid	5963.92	9020.18	11824.7	17685.1	30463.5	28240.4	196.257	332.043	193.549	262.959	107.798	211.537	151.136	235.999	141.051	494.309	598.853	619.442	11889.3	22235.3	4364.83	5439.25	2023.36	1561.93	208.133	174.513	198.39	373.636	381.772	164.285	121.96	504.549	448.503	490.362	496.005	317.36	1114.02	1179.85	1331.2	980.569	1154.95	233.045	421.593	554.944	464.283	429.555	418.886	89.2903
X450	Indolelactic acid	795.842	929.032	8029.38	1939.55	5031.19	3509.13	9131.55	40.3401	21.8881	32.2018	28.5286	39.3047	22.6215	24.2664	20.8881	1540.02	118.532	165.049	1406.04	3121.65	2065.3	595.336	158.778	137.806	14.5353	66.4929	4.7585	33.0011	35.9548	28.329	39.2913	54.0378	42.8699	94.531	99.5315	13.5072	36.1245	39.7342	43.3588	33.4358	29.7304	9.87939	33.333	2097.19	35.9292	37.1111	28.3438	0
X451	Indoxyl sulfate	9616.2	23336.6	84962.2	23925.4	10906.5	10472.7	13623.6	20147.4	23024.5	16983.8	28659.3	21730.8	21003.4	19151.2	23998.3	15768.7	16714.7	12597.5	15789.8	7212.81	10555.8	10985.7	27393.8	23829.2	9484.13	8482.61	10949.2	10501	9571.94	11427.3	11286.8	23043.5	24963.7	25087.2	21972.5	7518.44	12942.7	13687.2	12336.9	13534.8	12515	5172.63	14472	13052.7	12041.8	13568.3	13887.9	7231.06
X452	Kynurenine	1001.27	2391.68	2565.41	2328.02	873.239	838.186	4074.9	3551.61	929.645	3051.81	3353.52	3720.27	2540.84	2602.68	2461.48	2861.08	3055.24	2897.03	2066.58	2959.91	1977.13	2435.99	1238.54	1035.63	1231.03	1229.86	1307.05	1095.18	957.982	2467.79	2555.91	2232.83	2277.19	1723.9	1807.87	1327.33	3171.29	3545.66	3336.22	3322.47	3159.06	2640.36	1976.85	1755.06	1438.88	1487.23	1599.86	1989.12
X453	Maleic acid	1180.22	1432.69	1173.65	1977.54	1689.64	1450.62	1728.75	1571.07	1400.14	1308.45	961.575	1338.25	1379.45	1568.32	1255.81	1452.82	1585.08	1426.78	1312.62	1127.7	1037.29	1284.69	1182.39	1067.98	1282.67	1319.11	1597.81	1323.35	1217.28	951.848	1001.38	2002.33	1873.08	1619.58	1293.94	877.57	1641.49	1731.1	1714.49	1606.05	1713.46	1712.83	1052.99	1021.39	1520.59	1303.78	1376.18	1162.22
X454	Malic acid	111150	78877.4	72807.8	105906	96724.6	87865.7	90426	102631	79866.3	79693.5	50235.4	82712.4	63501.1	67754.8	61213.5	73465.8	81076.2	87630.7	74171.8	52680.9	71725.1	83981.1	87352.1	61114	125487	61530.5	82527	68638.2	65439.7	73318.4	37752.1	63625.6	63433.8	144183	33692	45631.3	72321.2	79348.9	72062.7	74187.5	76869.8	81762.6	87222.7	80907.4	113524	80831.4	96952.7	66481.6
X455	Maltotriose	240.77	2064.62	201.817	72.7581	560.361	462.18	503.019	290.914	293.539	829.862	11.5572	337.347	230.672	68.2891	221.046	314.251	44.7168	48.4926	447.417	371.17	829.194	343.466	1269.01	332.809	2946.75	51.4984	76.1465	1310.47	51.9176	52.9891	170.415	50.7172	401.198	159.711	100.296	294.905	579.021	292.106	104.332	81.4738	48.064	78.7655	100.054	96.6731	3434.59	2183.03	140.858	43.966
X456	Mannitol	662.687	585.208	670.253	787.822	609.342	660.105	771.19	776.777	427.525	689.771	671.607	691.933	775.813	749.826	716.115	751.291	733.607	665.275	464.86	573.454	353.14	381.675	405.601	420.781	461.905	497.893	493.012	573.643	536.089	699.465	758.922	770.389	681.336	772.885	823.718	299.548	394.149	395.286	455.317	404.687	454.722	82.2663	310.862	313.964	313.09	282.838	333.346	294.523
X457	Mannose	2.54429e+06	2.8669e+06	2.16762e+06	2.45055e+06	3.46322e+06	3.25439e+06	4.25654e+06	3.8181e+06	2.74845e+06	3.42451e+06	3.02533e+06	2.69859e+06	3.279e+06	3.36344e+06	3.12359e+06	2.6221e+06	2.65411e+06	2.72129e+06	3.28934e+06	3.08252e+06	3.06113e+06	3.48174e+06	3.45925e+06	2.84972e+06	2.81229e+06	3.06452e+06	3.31658e+06	4.30152e+06	3.66803e+06	3.68087e+06	3.40927e+06	3.70703e+06	3.34759e+06	3.33594e+06	3.21182e+06	1.56248e+06	1.1836e+06	1.61169e+06	1.57832e+06	1.49095e+06	1.47521e+06	3.01964e+06	2.91179e+06	2.8569e+06	2.48011e+06	2.13737e+06	1.31125e+06	2.224e+06
X458	maltose	724.643	2314.66	385.1	429.321	1477.56	1370.58	1363.5	1253.76	1685.73	1831.78	1110.79	1032.83	1181.31	831.403	1065.58	975.399	661.141	715.509	868.117	1055.64	734.405	653.72	1264.6	697.326	5838.06	442.974	327.479	1426.48	832.258	582.839	818.065	772.526	1359.84	627.613	565.133	570	497.82	460.619	159.424	161.324	134.714	424.6	752.616	601.227	4169.33	2255.16	193.147	270.74
X459	Methioninesulfoxide	1962.31	1697.62	1861.38	1875.98	1884.75	1820.85	2356.25	1967.34	1171.85	1585.55	1504.26	1781.87	1398.08	1513.14	1338.76	1260.7	1295.49	1425.1	2063.18	2083	2405.68	2708.64	2305.06	1802.67	1006.37	1108.33	1479.99	2025.77	1804.41	1759.19	1861.35	1872.3	1858.36	1780.83	1541.96	794.24	1862.48	2196.67	1816.84	1983.43	1750.84	1270.77	1178.24	1012.12	1548.91	1214.23	1009.96	1029.56
X460	N,N-Dimethylarginine	712.469	568.664	702.12	930.73	784.923	763.038	702.347	661.093	516.379	534.629	525.517	663.832	546.999	559.218	507.03	571.868	647.622	594.374	556.872	636.502	515.679	622.908	575.128	460.707	391.292	475.941	564.481	472.496	447.783	367.119	383.351	393.158	361.163	368.957	368.043	314.46	585.313	584.166	600.497	548.671	586.989	362.7	451.76	408.5	436.51	435.55	538.568	457.543
X461	N-Acetylalanine	10417.8	11272.4	15425	23465.5	14170.9	15190.8	12406.9	10513.7	12472.8	9650.55	9861.83	10479.6	10798.6	11914.4	10798.6	8593.48	9887.2	10201.8	13404.8	18218.6	16676.2	16394	9965.07	9190.19	8708.7	12311	10186.1	9537.83	10251.6	8894.2	8946.28	11173.5	9577.21	6347.69	6704.45	5266.87	9226.4	11157	11471.8	10657.3	11007	4583.97	5575.5	4480.73	6296.9	6191.14	6733.94	10500.3
X462	N-Acetylaspartic acid	1651.23	1304.42	1248.55	2866.05	1637.6	1407.07	1885.09	1901.56	1158.22	1619.85	1181.41	1563.34	1125.78	1251.09	1130.59	1214.48	1406.6	1473.47	1954.42	1821.67	1786.16	2086.25	2085.47	1619.19	995.368	1378.11	1650.26	1662.67	1660.69	1092.7	1072.96	1528.83	1323.04	1373.77	1107.98	874.344	1377.68	1437.33	1486.95	1473.83	1495.09	1316.9	1374.29	1373.78	1161.76	1239.14	1290.46	1084.76
X463	N-Acetylmannosamine	58969	40878.2	55514.3	63306.2	49317.7	48606.2	58833.4	47729.1	55181	40795.8	35987.7	42242.6	39266	40605	36961.5	45586.5	49558.2	45569.1	27381.8	29976.8	29803.7	31860.8	33101.6	24185.4	16702.4	18405.3	22229.1	25500.9	24591.5	15261.3	15313.3	14234.3	14016.3	16785.2	15949.2	23357.7	47780.8	47859.2	48332.8	45571.7	44875.1	45344.9	50680	57174.7	33539.1	32902.7	40539.9	33017.2
X464	N-Acetylserine	7790.22	5970.8	7447.9	9055.8	6781.6	6588.18	7923.25	7216.33	6599.29	5807.51	5533.11	6696.7	5831.35	6274.15	7545.11	6630.77	7440.88	6035.09	7485.76	8028.27	8365.35	9970.8	8800.04	6350.7	5341.54	6442.67	7864.53	6601.16	6372.65	3921.02	3917.86	4645.28	5096.38	4388.49	3903.68	5320.25	8048.9	8871.75	8194	8077.34	7827.18	6388.3	8775.83	8191.63	8027.84	7741.76	8200.11	6548.91
X465	N-epsilon-Acetyllysine	1423.44	1067.19	1154.95	1523.3	1124.57	1087.65	1551.59	1663.63	921.658	1394.91	1331.04	1463.87	1181.17	1395.58	1215.84	1067.84	1161.63	1130.43	1193.58	1244.98	1016.97	1268.88	1172.24	979.002	755.581	811.589	1032.62	1009.89	1060.19	1030.78	1075.77	1083.3	1149.65	999.938	970.267	391.151	802.927	832.561	777.098	842.079	717.535	512.947	338.696	365.336	484.159	496.922	444.493	540.442
X466	N-Methylglutamic acid	305.568	271.677	277.63	391.088	397.106	369.371	618.955	575.555	429.812	516.435	407.202	489.779	372.24	443.307	404.819	409.732	484.671	469.647	470.622	415.863	637.788	774.632	548.157	437.259	555.504	735.987	954.001	753.305	723.071	379.385	389.537	623.335	520.11	374.716	383.622	231.94	388.729	430.97	435.337	417.397	404.526	355.533	368.887	294.538	334.193	351.96	359.93	382.208
X467	Octadecanedioic acid	4706.39	9873.71	6785.48	7262.24	3953.02	3715.02	651.861	2336.59	1834.6	1966.24	2301.77	1806.36	1123.49	1033.1	1357.67	1351.26	1350.99	1334.6	6779.9	6776.2	7073.99	9715.45	8481.65	7333.42	2376	2514.73	2913.48	1759.15	1601.26	1378.47	1618.05	2526.66	2963.06	1807.28	1521.5	1599.96	7291.59	7694.11	7651.16	7818.61	6610.81	3146.11	2868.7	2175.14	2795.56	2885.3	2803.56	1272.56
X468	Orotic acid	6001.15	4544.56	5429.83	9961.7	8052.83	7875.45	7182.9	8376.8	4583.69	6808.63	6104.12	8673.4	5018.77	5440.91	4812.02	4068.15	4526.22	4441.32	3485.63	4511.83	4247.62	6050.54	5097.35	3959.9	2821.99	3493.85	4375	4438.62	4263.65	2610.51	2552.54	4481.16	4629.05	2324.18	2329.49	3094.43	4658.69	4928.14	4440.29	4430.69	4354.08	714.827	4745.65	4331.95	2485.69	2303.66	2624.76	4012.37
X469	Pantothenic acid	56799.1	46271.7	44822.4	64004.1	58740.9	51834.4	59998.9	66848.3	29717.4	47529.3	34397.6	43285.6	27534.8	33661.9	29783.6	25549.6	31206.6	29755.9	81512.2	59400	74632.5	114783	76857	47051.4	23061.6	42114.7	62996.6	52295	39981.9	26322.1	23910.8	55237.6	54575.3	34384.4	27032	16575.4	58737.1	84693.9	66225.8	61191.7	61349.2	15945.6	44751.2	38372.9	34756.5	25915.1	26418.5	31519.7
X470	Parabanic acid	150.556	139.539	116.712	270.068	213.292	164.198	287.13	187.737	129.484	142.2	100.952	159.616	176.21	210.729	204.575	145.067	196.527	181.013	212.084	323.488	193.036	363.981	333.922	217.491	171.365	318.355	382.858	385.393	298.494	232.037	221.841	370.694	311.939	250.491	258.149	64.357	101.929	139.943	126.091	128.898	106.156	9.67245	165.907	145.324	128.948	175.464	159.862	181.703
X471	Phenylacetylglycine	2612.12	1673.93	3163.85	5100.2	3076.71	2860.71	2692.83	4048.67	2761.4	3514.11	3667.11	3559.53	2791.23	2917.89	2797.61	2365.15	2583.3	2467.2	4938.91	3062.25	6056.79	7550.29	12154.3	10593.6	2652.15	3145.91	3478.32	3342.11	3083.85	1548.58	1495.62	3743.96	3751.57	3024.59	2772.98	1663.81	4322.83	5201.68	4529.92	4426.29	4441.93	1507.49	2782.02	2772.02	3963.71	4072.43	4031.05	1320.9
X472	Phenylpyruvic acid	138.409	144.808	126.837	165.172	226.996	193.049	136.278	133.994	96.4227	124.218	90.1441	127.697	83.3986	82.2261	83.0978	72.5699	86.8935	111.463	248.382	170.728	305.167	412.593	409.211	343.428	121.215	114.503	141.622	179.836	197.679	934.128	919.689	609.832	632.762	817.742	754.547	65.7268	122.667	123.462	108.928	123.783	108.57	134.34	133.344	119.474	142.974	130.58	123.307	84.2849
X473	Proline-hydroxyproline	2208.94	2417.23	3045.54	4143.8	2488.31	2463.68	3723	2941.64	3116.78	2485.03	2210.81	2634.43	2508.82	2796.56	2601.91	1869.71	2129.53	2068.7	2022.02	2614.47	2165.92	2848.6	1586.47	1356.23	1043.27	1271.9	1395.82	1347.86	1214.68	1145.29	1124.36	1486.41	1397.22	881.797	836.991	449.156	1039.68	1191.82	1158.75	1132.39	1064.59	319.321	433.04	414.61	526.797	515.52	638.757	775.017
X474	Pseudouridine	28124.4	21498.7	29643	38667.5	28205.2	28486.6	31370.7	27901.2	20816	21254.1	22784	24686.6	20962.1	23057.6	22859.7	19768	21021.2	20297.2	24551.4	31491.1	23421.4	28756.5	26902	21060.9	16889.4	20799.4	23657.6	22958.9	20016.1	15833.6	15486.1	18148.4	18128.3	14958.3	14604.8	12997.9	24216.1	27348.5	26009.6	25052.7	25312.5	16838.1	17903.7	17036.9	17472.6	17196.7	17285.7	17455.7
X475	Pyroglutamic acid	55304.3	49151.5	69273.1	76326.7	52514	60235.5	65672	66061.3	52107.3	48674.2	52253.3	65337.2	49888.2	52483.1	70564	56416.6	60413.7	52876.1	72966.9	89230.7	71754.6	86101.6	77407.4	57266.4	64399	81936.8	94423.9	84463.3	68709.9	43143.4	47287.2	48785.3	55335.2	44904.8	45285.4	48850	75716.7	86866.1	74591.4	72665.1	69759.3	76905.7	81315.6	65868.6	103845	88971.2	69212.6	75850.9
X476	Pyruvic acid	436.919	527.652	298.138	611.251	720.526	692.254	463.654	676.224	515.408	596.313	505.592	602.23	523.739	565.747	493.389	451.46	512.291	491.71	682.803	640.976	548.714	702.416	659.427	554.689	505.18	583.681	660.01	648.187	609.598	654.458	612.318	802.774	699.896	670.817	603.745	299.501	589.875	685.795	625.441	621.473	602.741	703.403	590.009	507.656	576.854	619.267	593.337	629.823
X477	Quinic acid	764.554	1090.42	567.576	611.55	3876.15	1352.3	1035.56	1116.58	816.667	1375.26	555.935	591.19	856.341	651.882	984.552	636.308	611.991	2618.13	1606.72	1584.54	887.084	1183.07	1314.12	4540.02	1702.89	711.218	821.103	952.051	1028.67	1572.87	1377.94	1621.55	1781.04	14101.5	1036.9	1123.94	1444.29	1181.2	1116.46	1256.07	725.634	1248	1838.7	1796.02	6244.42	3227.66	628.32	831.947
X478	Ribose	19867.4	21602.1	16625.2	18442.8	28735.7	26101.9	31804.2	30871.7	21435.7	25919.2	22334.8	18902.2	23347.5	24165.4	22245.9	19249.8	19367.6	20733.5	26675.5	27873.6	25298.3	31640.4	30533.4	23086.7	19801.7	23236.7	25137.5	35673.1	29456.7	49690.3	46130.1	51769.5	46686.2	45553.1	42608	10617.9	9673.37	13222.7	13096.2	12601.2	12043	27948.5	26821.6	25545.4	18667.9	17709.9	10746.3	18482.3
X479	Sorbitol	37043.6	28414.3	34592.3	51343.8	46281.3	43252.5	21378.7	27371	21210.9	25964.2	22789.2	31415.3	19772.4	18996.8	17657.9	28109.9	29778.6	27804.1	19624.6	27338	11274	11808.8	19403	18021	9829.03	9056.37	12415.9	13323	14124.1	8913.58	10073.6	9532.92	10172.7	11756.6	11262.5	19963	15508.3	14595.8	14357.7	13614.5	14347.8	9210.04	16302.5	19175.5	15759.6	15793.4	18213.8	11143.8
X480	Succinic acid	34817.6	32706.1	34513.8	36621.9	35250.5	36277.9	25473.6	28750.5	23748.5	27788	22056.7	30016.2	24665.7	27645.4	25347.9	27435.1	32476.1	32318.8	24577.6	21254.2	33451.5	32077.9	22279.8	19747.5	20142.8	22054.7	29039.2	22973	23543.5	13951.1	14935.8	20407.5	19310.3	16344.3	14366.7	23114.5	28320.5	27581.8	29337.3	27747.6	30304.4	34947.5	29866.1	28107.9	22281.3	23873	30724.2	29133.7
X481	Sucrose	2670.76	6284.96	17237.6	1859.41	4513.21	4512.26	11637.5	3859.69	4757.72	9249.31	1637.87	10458.6	3688.44	2928.27	3562.69	4912.53	2125.56	2267	17410.7	13935.7	9197.94	6143.26	9538.12	5508.06	16238.4	4130.88	4692.13	6889.85	3802.73	3684.24	4013.2	4299.54	9229.09	4134.64	2177.54	12015.4	7060.29	8178.03	3682.36	2813.03	1567.36	5435.3	15395	6511.15	41012.7	20563.2	2470.87	1758.27
X482	Tartaric acid	10.4239	7.52738	14.2782	12.3118	7.26129	12.0281	3437.64	1641.77	305.119	1293.83	780.722	1151.61	1710.74	1759.7	1744.42	1156.79	1309.57	1076.05	77.352	30.1141	25.0198	16.5915	20.9248	14.2085	1361.02	2053.23	2509.35	1247.43	1200.07	1291.16	1373.42	1888.8	1807.38	2532.78	2068.64	15.6244	16.7715	15.6937	15.3997	10.2631	14.0607	137.225	52.9177	42.2329	270.801	135.414	78.5582	28.9287
X483	Threonic acid	3331.09	3482.64	3208.61	2569.01	2501.76	2237.68	2429.87	4054.85	2446.6	3527.51	2724.05	3537.67	3377.92	3553.09	3328.91	2693.72	3151.1	3195.17	2800.45	1839.15	2950.57	3008.78	2036.83	2139.57	2304.14	2174.42	2729.92	2266.94	2511.72	2178.74	2225.76	2891.1	3023.27	2321.24	1903.5	2184.05	3561.56	2993.33	2869.46	2720.52	2756.8	3916.25	2494.35	3162.37	2777.69	3155.19	3629.6	3358.84
X484	Threonine	69040	43848.6	51225.1	73696.6	63829.7	66028.2	64713.1	72122.8	41190.5	62789.6	59234.7	64549.7	57526.2	60000.7	54450.4	50193.7	53448.3	55807.5	71437.1	71417.7	80065	89200.2	66629.5	59610.4	44647.7	59767.5	64471.3	82134.3	77466.7	57615.8	54730.5	72291.6	66836.2	55404.5	55419.2	39302.7	66326.6	75030.5	74642.8	70617.9	70316.1	61339.3	57259	53615	50339.3	47388.5	51700.3	59518
X485	Uridine	29645	32586.2	42937.2	36102.1	28417.6	27409.8	29658.5	28851.3	38205	26451.6	28110.4	32520	25130	28129.4	29815	37047.7	37496.1	35283.4	21304.8	16347.9	17965.1	19227.9	16916.6	15199.6	20614.9	19246.3	23320.1	15717.4	17449.6	12077.5	12322	17968.1	19648.8	16706.1	15396.4	37647.6	33049.3	33939.2	35083.7	35411.9	30346.9	17552.6	29709.3	29449.6	24726.5	23999	30620.3	22996.3
X486	ASCORBATE	3447.68	2598.23	3088.74	2720.68	2504.3	3136.24	2207.08	2244.32	2702.58	2600.23	2162	2659.83	2690.95	2516.23	2327.97	2400.17	2537.71	2841.3	2058.2	2250.36	2826.94	1704.32	1785.68	2223.01	1835.59	1668.13	1547.77	1415.55	1125.78	1943.45	2085.8	1468.55	2190.09	1535.75	1913.73	1164	2303.1	2307.16	2378	2590.55	2105.98	662.205	1270.95	1262.17	1380.74	1668.43	1499.51	1156.66
X487	GLYCOLATE	142.243	135.171	142.468	319.549	258.29	247.381	405.528	236.069	139.361	202.703	139.108	205.211	175.892	216.832	179.9	150.886	198.352	201.157	322.55	446.276	280.024	527.293	454.706	262.035	163.533	322.993	418.93	429.036	349.042	215.762	209.894	344.014	316.769	244.171	239.096	65.8004	152.691	210.883	177.024	169.134	153.718	3.44604	199.554	206.324	178.482	199.493	185.769	199.057
X488	DIHYDROOROTATE	274.777	618.486	366.789	219.581	366.363	270.629	131.567	293.936	42.2729	356.518	146.428	186.263	205.058	272.597	241.107	122.604	69.0237	125.459	527.335	312.049	139.402	155.705	192.043	248.669	128.074	55.3644	71.6331	123.646	127.062	60.3509	65.4062	13.3201	57.723	147.321	71.1602	0	82.9588	64.2042	158.662	86.8169	126.11	61.21	28.4228	90.5281	17.5533	24.439	33.2243	33.5706
X489	MALONATE	1238.65	1702.09	835.407	1401.73	2028	1792.26	1314.33	1204.58	1066.1	987.943	644.305	971.566	857.449	812.092	769.093	664.177	803.688	1063.05	2321.72	2003.6	1672.47	1887.28	1990.96	1628.4	1208.85	1421.33	1838.68	1516.52	1373.99	2263.4	2037.5	11774.7	11990.9	3137.78	1866.06	997.628	1583.1	1776.9	1557.83	1657.66	1399.52	1571.24	1433.77	1134.77	2121.84	1708.54	1251.95	1240.96
X490	SHIKIMATE	182.538	148.252	155.33	180.501	212.499	204.473	171.301	154.328	138.439	171.729	85.2326	96.6861	97.1874	98.7355	94.5176	76.439	91.9106	147.628	281.267	341.257	180.458	261.562	212.411	164.615	150.523	150.791	215.343	165.781	189.293	151.743	141.909	243.474	286.563	177.739	135.182	156.582	253.342	349.534	235.279	324.917	261.76	348.797	209.282	195.677	214.517	270.13	238.494	287.833
X491	URACIL	2359.01	1571.12	1529.24	1846.78	1449.72	1413.44	1162.98	2038.1	1930.51	1794.16	1562.95	1855.41	1143.66	1071.26	1044.37	1192.71	1089.79	1081.84	1661.07	1161.89	1015.64	1004.96	1165.94	965.385	762.875	771.126	1028.37	845.139	864.951	724.122	768.198	813.576	815.024	958.485	877.896	789.068	1729.72	1694.83	1645.7	1640.64	1635.75	1120.69	1106.43	1144.53	1132.12	1052.76	1126.18	1135.57
X492	HYPOXANTHINE	1811.55	1508.57	1965.06	2436.23	1914.72	1847.18	1828.29	1640.43	1391.9	1315.55	1423.64	1364.43	1238.35	1297.41	1310.28	1080.2	1191.8	1113.35	1260.64	1623.81	1281.4	1731.98	1513.43	1255.53	896.938	1015.13	1234.97	1146.08	992.93	712.596	706.958	740.284	867.21	825.086	702.028	549.411	1386.7	1628.43	1508.45	1470.47	1575.16	936.788	918.592	849.12	895.492	928.332	984.787	971.135
X493	LYSINE	107858	85291.9	91693.6	131829	90248.6	89298.8	200563	198819	126311	163570	148568	182747	189671	209879	183303	175921	194686	189143	139629	150924	109814	148354	127811	97403.4	98512.9	126446	141582	196121	184986	178569	175512	143062	131323	152036	151573	84307.3	130957	155534	144239	129701	135376	125630	112880	100432	122427	113663	122457	170966
X494	AMINOADIPATE	98.1236	211.037	144.795	312.315	499.96	399.932	819.498	881.317	146.343	775.851	355.571	323.121	402.112	486.017	587.121	293.474	344.008	340.102	606.865	594.605	787.271	843.728	620.882	546.726	339.717	327.547	712.896	1015.13	886.43	320.436	390.229	363.181	455.313	408.192	200.577	336.214	266.979	216.394	122.426	189.342	188.367	311.15	182.492	165.279	105.192	156.945	91.657	344.636
X495	GLUCOSAMINE	6660.17	4356.58	5022.88	9315.15	9576.37	11384.4	6428.37	6273.82	4515.59	5731.87	4886.84	5981.5	5065.77	5755.39	4923.09	4782.26	5787.11	6480.66	7994.87	11996.4	11511.3	9238.66	7572.15	5663.76	4482.35	8964.62	6647	9903.15	9778.51	6508.25	5846.03	9135.22	6474.53	5893.81	6582.19	6017.84	11829.4	17420.1	19663.6	15834.6	18221.8	16844.9	19166.8	11952.1	9714.35	8301.11	10523.8	14953.5
X496	GLUCURONATE	1422.77	988.779	1269.28	1174.57	798.106	800.855	1205.18	1242.86	1070.59	1118.43	1311.88	1177.88	1062.79	1189.89	1275.46	1166.93	1140.45	1272.83	1388.47	1634.68	1331	1461.09	1395.56	1370.78	1400.57	1898.01	1561.78	1655.59	1671.98	1982.94	1874.36	1509.19	1411.98	1626.73	2041.06	1216.89	1584.03	1739.62	1810.86	1654.5	1637.33	1108.13	1518.46	1569.22	1590.5	1386.76	1403.21	1708.52
X497	PYROGLUTAMATE	388.056	419.113	599.809	420.531	361.973	342.109	362.313	396.908	591.372	378.339	403.717	438.6	385.344	426.677	446.258	580.343	589.084	492.646	289.585	234.344	211.496	263.573	251.19	193.209	298.954	283.565	331.105	228.936	228.769	151.198	168.875	240.406	243.734	237.101	194.771	529.016	436.143	424.755	422.625	484.016	438.593	235.937	420.368	397.992	354.5	339.884	469.139	325.617
X498	3-HYDROXYMETHYLGLUTARATE	14373.1	13701.4	10927.7	16722.2	16782.8	21365.6	18410	13285.9	12067	10776.1	12380	11227.1	12455	12652.8	11676.1	10799.9	12378.3	14120.4	14643.8	21854.5	14538.9	19600.2	19449.4	17153.5	13639.9	18566.5	22406	23057.7	15221.2	10141.9	9596.66	17057.4	15975	7882.69	8536.68	6122.02	7740.45	6943.47	4893.88	6905.68	6581.82	20196.5	6340.49	6306.37	5521.97	5643.95	5166.74	9631.06
X499	N-METHYLGLUTAMATE	5670.33	3740.89	5125.19	5212.52	4960.37	4774.04	4140.45	5322.54	2864.06	4379.84	3990.01	4421.83	3314.35	3391.23	3377.93	3323.9	3702.66	3502.5	5259.43	6180.36	6852.22	8023.62	5253.97	4002.31	3154.97	3953.98	4652.26	4621.15	4099.82	3531.13	3532.61	4954.33	4968.17	3711.55	3469.28	2568.61	6319.47	6969.92	7002.81	6397.35	6644.05	3814.15	4193.87	3809.97	3597.81	3427.89	3722.7	3527.83
X500	N-ACETYLASPARAGINE	499.722	593.513	585.445	918.58	668.163	658.92	451.752	482.176	638.772	532.702	398.367	425.453	518.977	467.329	413.964	536.865	593.386	616.471	736.561	735.379	894.089	593.258	409.102	469.795	653.226	586.821	672.467	392.468	450.059	496.641	479.855	264.682	198.533	228.547	257.163	331.524	528.618	620.346	519.684	492.069	445.227	461.527	418.945	485.987	396.442	454.146	472.117	683.417
X501	5-AMINOLEVULINATE	207.339	434.414	308.466	544.658	1199.39	862.926	1947.21	1265.28	249.439	1225.19	536.487	433.925	610.636	743.237	972.33	468.397	482.153	589.585	947.383	886.434	1089.39	1242.36	965.024	884.32	571.386	579.625	1104.87	1679.51	1399.49	442.159	586.436	505.062	628.44	611.534	265.772	444.656	323.301	251.273	180.973	212.437	211.764	273.401	191.593	161.996	144.709	188.227	139.587	308.487
X502	D-MANNOSAMINE	102.691	314.526	117.079	278.928	614.778	508.768	708.479	756.376	170.862	713.011	353.292	293.252	354.195	426.024	531.058	324.757	374.006	438.977	557.552	503.394	712.724	768.635	671.996	580.482	406.066	416.376	651.344	809.635	778.632	221.61	321.426	341.718	386.494	351.455	164.206	357.505	238.563	161.527	85.1555	165.202	118.092	355.457	199.286	125.644	98.2783	164.442	73.2851	278.517
X503	METHYL GALACTOSIDE	912.952	700.787	599.567	1047.04	716.504	803.306	1116.07	1272.5	1539.42	1158.77	919.479	1042.84	849.082	859.17	788.499	728.673	731.791	683.753	1037.64	1021.3	1523.85	1576.27	1037.13	1007.12	2321.06	2510.14	2299.93	1218.98	1111.26	876.231	891.546	3874.91	3871.29	987.164	856.372	1835.08	3192.27	3755.49	3341.46	3333.21	3247.25	1926.68	2299.75	2191.73	4613.57	4763.3	4291.93	2907.31
X504	DEOXYADENOSINE	509.631	310.175	405.765	442.213	485.265	369.609	628.928	518.57	458.47	426.916	349.502	368.988	474.34	426.359	414.488	508.837	547.063	438.974	446.678	364.888	384.527	523.792	520.67	301.784	696.933	735.419	757.16	626.19	449.728	555.304	475.485	579.023	705.99	580.75	582.378	675.812	1160.11	1290.06	1157.7	1221.06	968.798	849.497	1234.95	959.509	794.084	741.854	1174.16	734.682
X505	5-AMINOPENTANOATE	1236.04	659.511	423.437	965.008	1522.98	1706.76	404.806	838.117	258.355	819.663	800.997	817.113	511.152	584.26	526.628	685.212	877.982	899.922	1926.96	2018.7	2879.92	2456.02	1851.93	1679.36	774.266	1279.52	1025.46	1349.49	1407.79	1181.84	1157.12	1493.58	1119.77	1309.25	1311.62	768.429	1548.69	2025.08	1994.65	1842.24	1922.28	1567.53	1375.47	1051.84	1142.34	1131.09	1262.06	1571.69
X506	LACTOSE	228.672	144.784	176.018	171.629	139.58	113.12	213.766	169.46	150.686	145.378	152.12	249.355	162.144	188.999	174.484	162.138	168.395	123.7	202.645	172.353	232.249	230.066	221.123	172.511	114.659	156.189	203.171	177.094	222.064	142.47	170.583	140.459	153.099	88.6671	156.457	255.966	314.365	321.972	360.468	316.534	332.15	266.33	259.172	322.073	265.023	302.745	297.377	269.285
X507	3-HYDROXYBUTANOATE	10153.8	8469.11	6529.89	18772	10303.3	10048.2	12597.2	15847.5	22685.9	13678.8	11759.3	11746.5	7483.56	7791.43	7884.29	7635.9	8117.56	8012.21	14176	15766.7	22199.5	26773.4	14019	10984	31767.8	40814.4	49120.8	12508.2	10314.3	8067.06	7693.39	68083.8	64171	9442.68	8164.18	27023.9	61124.1	70360.7	62793.6	63251.1	60891.2	3599.18	37191.7	32214.4	79379.2	87282.7	83328.4	46019.2
X508	GALACTURONATE	682.923	671.533	754.692	784.539	511.076	529.953	676.759	719.532	515.519	693.655	779.813	761.458	669.682	689.519	685.002	620.99	656.326	645.548	937.166	1038.11	820.803	920.669	821.012	794.147	765.152	1025.32	939.374	992.933	975.452	1101.22	1066.87	827.381	790.563	810.581	1041.85	875.068	841.494	1094.62	973.022	961.067	791	844.068	954.829	990.543	836.256	945.498	870.25	873.355
X509	MALEAMATE	328.471	329.804	294.289	332.271	337.836	353.529	345.138	324.572	319.645	348.358	321.465	343.636	326.262	361.2	324.855	327.545	302.741	330.291	314.948	333.006	342.045	346.099	327.558	347.266	365.077	322.283	328.683	333.829	349.466	312.922	356.638	334.878	315.607	351.539	346.633	317.371	302.216	306.76	336.007	295.351	328.536	316.747	313.124	338.179	337.306	340.838	341.936	362.461
X510	N-FORMYL-L-METHIONINE	219.809	168.339	263.996	191.97	295.814	259.944	256.89	249.761	213.948	206.439	222.815	205.772	200.508	194.501	200.909	223.967	249.839	228.378	291.916	305.541	339.903	401.094	344.299	279.495	326.122	410.11	390.78	266.427	290.063	241.47	229.19	236.272	228.469	279.769	259.995	177.827	392.603	539.48	500.621	437.008	435	177.059	320.662	276.013	318.67	376.034	336.563	265.11
X511	2,5-DIMETHYLPYRAZINE	95.1565	208.931	142.616	164.439	237.052	147.026	165.501	192.13	154.337	156.968	52.1148	253.887	51.0094	49.3792	96.1641	71.2676	55.197	87.196	319.389	381.33	251.848	199.36	250.116	169.637	193.017	73.537	126.085	273.253	142.266	208.512	199.758	179.518	215.631	295.976	139.979	213.208	189.589	190.33	163.334	128.275	77.8848	54.6552	246.872	162.256	379.698	270.244	109.235	72.7293
X512	GALACTOSAMINE	3899.32	2921.93	3749.9	4984.68	2354.2	2541.68	3347.27	3963.64	3651.45	3258.41	2155.79	2942.37	2677.97	2565.71	2451.47	2899.98	3119.08	3084.93	3008.36	1718.34	1704.21	1701.98	2256.92	1588.06	1010.08	1205.08	1384.48	2140.21	2063.94	1250.19	1239.09	1491.83	1380.11	1539.51	1524.49	2203.71	3657.65	3719.94	3341.58	3373.26	3437.38	4851.9	4618.26	4269.02	4774.63	3794.63	4245.04	4008.51
X513	KYNURENATE	134.838	187.164	138.53	188.103	204.073	206.776	303.506	264.425	95.0706	198.229	222.789	265.161	179.104	189.169	158.26	173.787	205.791	194.685	199.604	188.79	151.905	193.14	196.602	152.197	106.546	120.644	125.855	190.36	200.356	160.177	168.747	124.899	147.042	178.33	137.503	71.0998	283.619	298.89	234.189	235.983	204.102	259.228	154.76	119.069	135.666	125.2	103.052	198.579
X514	TRYPTAMINE	110.64	233.666	214.923	129.1	266.193	234.298	312.779	227.423	152.646	180.688	184.579	170.812	212.022	188.864	198.27	245.522	299.933	252.523	404.633	403.538	455.692	557.624	474.001	376.293	260.314	321.95	379.716	399.41	379.149	265.127	290.459	362.984	401.731	379.813	291.897	211.614	190.643	195.347	195.135	176.73	172.635	314.093	418.883	362.662	255.633	239.261	230.097	249.685
X515	INDOLE-3-ETHANOL	119.524	168.067	79.6737	185.919	120.703	105.509	137.726	123.526	71.9395	122.026	77.9271	77.2315	127.02	113.893	165.534	137.155	102.881	97.2166	391.643	509.122	430.35	570.067	404.021	379.24	266.092	317.249	289.257	485.423	382.578	266.36	237.151	144.433	161.382	306.541	299.026	37.4254	33.0149	74.3154	38.2785	51.1268	32.4474	55.4019	20.8021	22.7189	59.8636	24.1623	35.0663	27.5921
X516	PROPANAL	1009.45	1379.75	999.952	1519.87	1357.61	1303.1	879.097	1216.49	879.327	940.652	681.707	886.791	958.622	1076.54	1063.92	930.882	1110.91	1107.75	1716.93	1956.21	2163.65	1702.3	2142.34	1789.16	1754.33	1684.2	1967.9	1575.75	1620.04	1536.38	1752.85	2015.29	2046.77	1589.03	1484.72	2658.51	2883.79	2272.17	2252.91	2225.29	2479.3	2404.43	3267.41	2456.3	2100.59	2179.08	2296.81	2173.9
X517	3-AMINO-5-HYDROXYBENZOATE	115.597	143.346	119.599	124.172	192.362	176.241	209.104	222.776	153.417	198.546	128.693	156.749	149.212	127.272	113.077	144.541	176.004	168.852	198.915	205.717	144.496	242.782	206.234	158.081	128.864	154.223	173.676	217.854	151.688	116.601	109.754	227.709	172.533	193.401	156.611	55.1331	115.504	162.46	146.67	146.731	114.105	62.5336	153.087	162.542	166.621	129.861	155.929	113.736
X518	BENZALDEHYDE	958.06	1089.76	688.021	853.764	1139.2	754.817	507.801	682.518	519.605	716.938	734.346	698.697	361.895	786.304	1160.64	498.57	563.973	1119.15	782.053	1116.66	719.705	560.13	730.287	616.785	836.718	655.432	918.532	963.462	592.91	553.777	953.724	727.866	702.91	684.954	721.306	904.897	807.223	647.737	652.091	650.878	815.317	757.747	899.251	642.645	532.685	719.095	767.973	712.011
X519	INDOLE-3-PYRUVATE	926.21	292.702	401.495	165.788	116.446	122.801	22.3015	638.822	96.5923	470.21	840.207	724.77	31.6846	58.4744	48.9052	46.9247	39.1659	55.6872	548.856	327.503	885.332	1205.76	1414.45	1287.82	270.574	430.964	524.301	462.939	324.616	77.3735	98.7193	1486.51	1707.43	232.163	190.16	90.8177	1535.16	1593.73	1241.52	1419.27	1077.95	25.2353	110.097	68.9301	244.639	261.2	213.697	25.3972
X520	5-VALEROLACTONE	69.0547	51.3644	74.3747	111.872	78.9903	92.2725	72.9902	68.3882	52.3006	71.2908	47.0798	68.5367	43.827	66.2464	75.1443	48.881	80.2229	68.4313	110.331	122.888	94.0513	128.349	126.132	94.8385	76.0174	99.857	101.356	92.2399	110.415	69.6084	65.5247	221.283	178.368	94.8982	115.903	38.7392	114.4	182.426	154.515	101.396	105.747	1248.79	83.4999	82.7929	198.726	183.003	158.385	88.4105
X521	OXOGLUTARATE	27.0027	39.8987	28.2744	54.529	34.3465	75.3249	34.8814	110.963	48.3622	117.604	91.3458	17.8719	30.8358	117.617	110.398	24.0393	32.2901	88.1431	88.8775	98.2174	35.4906	62.0752	60.4494	23.2322	20.4	123.793	43.4649	54.3467	52.1073	145.072	71.0716	472.566	382.543	126.51	302.261	104.384	214.599	110.886	296.421	215.299	120.103	155.914	125.476	149.217	218.038	289.625	599.348	151.894
X522	ADIPATE	134.901	127.124	33.0543	52.2104	163.476	146.18	58.7839	60.4038	159.199	119.332	58.6965	75.5422	41.0723	67.1262	65.0078	60.6104	59.989	174.079	212.659	353.177	99.4515	249.948	160.044	175.492	191.057	163.754	187.378	139.023	230.789	60.14	72.8112	216.616	165.793	101.962	57.6571	192.239	227.344	212.407	258.653	255.068	204.815	624.005	157.004	121.243	176.497	269.261	269.986	189.696
X523	INDOLEACETALDEHYDE	960.221	1755.14	1113.84	990.588	1395.74	1515.77	1154.23	1106.38	774.917	1189.34	1271.28	1028.66	1616.05	1573.43	1793.79	1865.5	1619.48	1589.44	3026.58	2811.21	3392.24	3337.53	3022.6	3406.36	2374.71	2050.11	1746.15	2428.74	2670.49	2714.65	2401.14	1518.61	1611.98	2451.65	2460.36	2395.27	881.259	934.863	920.696	928.208	934.036	1550.29	1531.81	1449.6	1618.16	1382.87	1026.67	1671.39
X524	5-HYDROXYINDOLEACETATE	360.431	898.731	453.793	733.296	1921.85	2182.4	737.561	707.258	244.876	720.284	657.753	536.392	771.644	991.171	943.849	357.679	444.65	461.192	527.773	427.665	702.855	879.562	689.618	540.889	93.5913	101.163	156.065	521.399	568.05	433.178	453.687	172.539	173.8	214.519	196.432	48.9659	90.2267	67.3898	80.2796	120.507	64.52	64.6241	48.012	34.7241	31.9167	40.9468	42.7665	116.706
X525	ACETOACETATE	67.7152	80.1294	57.2277	86.7034	104.761	75.3505	119.373	126.737	87.3218	138.211	87.6129	106.089	112.413	153.173	133.774	122.095	134.313	133.738	171.945	241.61	144.386	208.482	192.15	146.98	126.838	175.163	202.098	238.218	219.937	1208.13	1105.86	1633.71	1536.43	1090.12	1075.31	74.8935	163.087	176.348	151.651	163.489	127.8	31.0669	177.335	159.712	177.479	167.187	142.322	138.355
X526	L-GULONOLACTONE	716.116	753.729	564.067	535.357	780.952	792.304	777.517	970.103	885.696	1004.03	1090.71	844.233	1262.1	1118.42	1286.51	885.365	724.973	811.884	1119.51	1030.93	1001.23	970.926	973.525	988.821	955.666	902.812	869.344	1465.29	1327.18	1514.84	1253.71	849.16	841.728	1115.71	1163.23	471.29	281.251	306.957	298.817	407.564	300.005	492.625	624.059	682.133	599.439	522.604	321.702	684.815
X527	NONANOATE	3559.18	7053.07	3779.9	4035.87	5263.51	4596.76	3271.98	4003.52	4910.18	3172.11	3981.53	4171.98	3812.13	3364.88	4254.41	3146.15	3711.8	3821.23	7667.95	7434.72	7322.57	4907.49	8582.95	7932.72	8675.59	6566.52	8689.68	5897.51	6773.49	5241.71	6359.3	7418.68	8237.1	6765.84	6124.72	10056.7	8928.48	7356.32	7192.12	7749.7	8813.42	9298.99	10326.2	6045.64	5945.47	6624.69	7551.74	5828.9
X528	PALMITOLEATE	40104.3	148821	113864	118117	40989.9	50696.1	48145.9	71467.9	67403.7	65151.8	77464.2	59960	44479.3	33442.3	43766.1	48533.1	43484.2	32690.7	71963.9	78564.2	40244.5	33831.7	47772.2	35047.1	34307.8	29522.4	26963.2	31675	28025.2	33700.8	32450.7	97256.1	103015	35575	33823	28192.5	85019.3	79544.5	84845.3	89167.6	74560.7	90338.9	79350.9	43944.1	67429.1	78322	90953.2	37517.3
X529	LAURATE	6101.23	12632.4	8386.89	7987.37	7378.89	6736.05	9058.53	9396.88	11553.1	8328.26	10212.5	9036.46	7291.5	5781.59	11093.1	7758.61	6810.42	6685.65	9300.4	11052.8	8338.3	9194.52	10816.5	11007.2	10070.4	9334.58	10792.5	8822.57	9332.17	9302.36	10308.2	14537.4	18625.6	11923.1	9020.31	16319.8	9793.67	9791.04	13061.2	8822.52	10898	11384.7	14563.8	12329.8	7328.34	8740.96	12433.9	7017.48
X530	ERUCATE	7325.9	4633.88	13134.4	3370.22	2193.57	4490.12	2514.79	2960.45	10530.1	3657.4	5846.81	6684.43	5393.81	4139.97	7760.75	7836.94	5020.51	3802.18	2492.36	2642.96	1626.89	1322.12	3653.46	2460.62	1740.61	1315.7	1226.42	1420.85	1845.75	1380.89	1998.41	2870.68	5282.08	2338.87	1790.82	3549.85	2336.99	1890.63	1717.31	1993.25	1453.33	1965.82	4456.95	2904.08	2671.48	3645.17	5474.18	1867.05
X531	HEPTADECANOATE	77987.6	85697.5	108582	37019.1	33646.2	31315.4	57213.9	59629.3	127495	58666.6	133840	102523	46720.1	52682.5	82917.3	52562.1	66192.6	48272.9	42244	47123.5	25696.5	22529.3	22768.2	26514.7	33069.4	21187.7	31256.5	35565	26034.6	31648	62877.2	63857.1	56941.9	43780.2	36665.9	51723.8	96329.8	119911	50465.1	109694	98074.6	61555.2	102983	29125.7	41173.2	87727.5	81309.3	35552.6
X532	LINOLEATE	770027	873771	1.25169e+06	1.01553e+06	273978	283782	629715	910645	1.04487e+06	811104	1.17485e+06	880518	560145	444474	639234	746374	648027	457072	700573	641132	483889	340385	403587	359859	438258	340775	300571	442059	389855	487100	497891	976443	1.03146e+06	556754	522091	310657	858417	780502	823251	949440	732298	547574	946704	557396	603002	768103	724001	262051
X533	OLEATE	637380	857388	1.31696e+06	771941	377641	402343	1.09121e+06	1.36229e+06	1.6244e+06	1.2174e+06	1.89959e+06	1.28609e+06	1.06768e+06	814658	1.27647e+06	1.15418e+06	1.00818e+06	689130	708320	691262	496542	332525	426500	390255	727962	563759	523402	718397	598093	825159	913196	1.71954e+06	1.85857e+06	963836	873341	485933	633779	567071	589772	697258	544255	1.00247e+06	1.34899e+06	682062	940243	1.17019e+06	1.06897e+06	552331
X534	STEARATE	569577	623341	605666	484542	402346	356128	402461	506430	743328	468485	691307	608941	535358	463557	657961	612034	557991	459193	342168	317655	273724	244326	223244	262292	326598	305291	258923	303309	292107	331033	434032	418324	428351	447246	412050	696102	1.05024e+06	1.1751e+06	564905	818791	1.0389e+06	654710	808318	402550	642210	886189	771243	375290
X535	NERVONATE	1820.74	2324.3	2376.23	1705.61	743.236	1063.78	521.581	1249.59	2749.52	1584.58	2889.51	2385.88	1750.29	926.129	1812.47	1592.61	1088.53	861.439	2656.72	3610.49	1210.24	785.123	2668.37	3047.89	1341.36	1064.86	840.515	721.614	574.518	934.102	868.721	1605.05	2305.63	750.333	606.611	2461.66	3312.72	4612.56	1961.35	2672.65	3717.47	2853.8	5007.64	4694.06	7166.16	9122.52	7343.56	683.42
X536	DEOXYCORTICOSTERONE ACETATE	5957.43	6914.48	4202.41	5485.59	4798.57	4121.63	3847.4	4868.13	6134.81	4482.28	5338.1	5429.88	4512.87	4381.77	5748.79	5205.16	5194.99	4420.9	5379.99	5972.23	4095.7	3334.47	2606.01	3337.38	3953.57	3594.52	2990.43	3588.99	3072.01	3255.85	4562.57	3762.94	3068.53	3831.95	3267.78	5427.07	9700.57	10482.3	5907.75	10088.4	7592.41	5635.85	7581.27	3744.48	4382.79	5732.23	5774.52	4097.25
X537	DECANOATE	398642	334242	684005	111199	214149	164381	317572	254388	484278	272871	790857	654396	150456	377234	379677	158800	324585	313430	187562	251979	118026	141418	166022	195320	216406	85470.6	314207	260921	210626	204913	499302	472941	320696	285645	218125	190834	40007.6	77877.1	120859	154532	109632	123982	162699	71049.3	55798.7	162806	147812	195782
X538	CORTICOSTERONE	364.463	0	49.2901	59.0298	80.0799	32.9966	0	149.676	452.761	229.715	388.704	202.683	144.316	104.381	193.003	47.2006	73.3703	40.7299	195.671	0	385.385	727.218	272.361	204.932	0	0	0	45.7899	66.6761	44.1979	55.9248	765.485	666.111	171.717	101.357	52.7716	372.705	571.513	615.625	626.004	612.332	12582.3	1768.24	63.8316	27.4134	0	0	0
X539	2-Octenoic acid	796.93	1717.91	787.561	1353.58	1468.56	1354.37	273.783	613.696	508.161	592.088	462.773	532.544	407.954	446.776	432.727	453.036	488.968	523.732	1107.45	1321.39	856.76	1173.2	1186.08	912.761	656.282	884.48	885.221	660.169	749.759	558.285	558.508	1262.24	1381.82	710.373	670.194	647.997	1190.53	1072.71	1086.03	930.676	1003.75	788.674	747.303	615.328	767.795	908.371	818.785	526.878
X540	2-Oxovaleric acid	3387.48	3458.6	1852.96	3439.33	4258.04	3959.09	2759.86	4165.32	2838.41	3604.16	2433.02	3106.75	3163.7	3609.7	2657.24	2291.17	2701.53	2602.8	3040.7	3283.87	3098.08	4084.93	3592.13	3217.8	3928.91	4639.71	4295.22	5406.69	5385.41	3865.28	3570.84	3884.68	3636.02	2838.43	3054.02	1811.12	3365.52	4030.4	3640.34	3377.01	3602.47	4690.86	4098.29	3508.86	3588.71	4155.2	4307.55	3392.21
X541	3-Methoxybenzenepropanoic acid	172.018	97.8702	67.8167	79.7932	118.621	85.4054	38.5905	102.841	43.6611	60.8108	31.194	92.6715	33.242	97.3438	138.606	44.9179	48.6564	155.87	43.7707	105.852	86.008	72.1419	52.3022	100.892	105.234	27.851	85.2502	100.92	42.5967	30.0568	89.5275	93.9826	65.5806	81.9198	61.2596	85.1096	22.4269	0	26.9862	66.9787	13.7996	16.4964	31.5323	16.8587	8.30445	20.6636	112.001	67.0819
X542	4-deoxytetronic acid	1714.95	1587.69	1844.81	4508.32	2726.96	2691.97	3004.25	2623.06	3215.85	2344.61	2060.51	2355.72	2365.39	2448.01	2229.64	2379.63	2375.72	2316.73	2060.55	2556.84	2098.32	2575.28	3120.61	2614.46	2279.6	2593.84	2613.81	2567.94	2334.11	2036.91	1922	3760.29	3557.42	1912.82	1755.02	2378.68	2681.92	2933.65	2793.66	2822.1	2852.63	333.542	3222.72	2997.29	2301.01	2238.73	2492.83	2441.9
X543	5-Phenylvaleric acid	44.6568	99.4791	51.3499	57.9313	84.0417	78.779	44.9468	34.0705	61.5736	45.5652	71.8166	60.155	66.5517	63.9588	77.8196	53.9434	48.1172	59.7171	141.823	131.268	140.813	123.557	156.523	185.168	170.555	105.28	141.669	157.108	138.371	155.708	122.761	131.626	203.18	182.793	93.483	57.644	71.6121	41.2387	74.8757	77.0388	103.203	85.4123	124.052	60.7168	53.1983	47.4556	72.6985	37.4822
X544	Dihydroxyacetone	1992.24	1871.73	1897.69	3594.37	3333.3	2941.47	3999.67	2760.94	1972.69	2237.13	1830.18	2302.69	1861.26	2321.37	1929.35	2014.68	2430.63	2408.6	3337.22	4358.87	3073.75	5301.12	4688.08	2852.76	1901.68	3079.12	4501.34	4292.4	3516.96	2201.47	2167.77	3294.27	2939.38	2488.22	2303.24	1273.43	2511.14	3624.1	2808.48	2815.26	2751.17	296.031	3178.28	3019.86	2658.07	2617.07	2964.71	2439.56
X545	D-lactic acid	524381	408037	416408	517725	497150	471549	474625	454595	400317	395864	354874	465851	374842	396794	374321	407061	434580	421337	436910	451422	414293	495030	479585	383546	332175	405866	497877	389037	385578	287502	298920	374201	391819	328265	320696	360996	549406	617238	551695	538945	523991	42513.8	486104	503041	444373	445960	517803	435204
X546	N-Carbamoyl-DL-aspartic acid	630.167	305.803	355.402	908.238	557.356	512.434	513.542	869.699	318.792	759.706	607.808	887.906	237.33	269.91	238.367	267.518	293.435	269.144	139.929	178.406	171.675	211.732	131.311	108.238	97.7835	105.91	134.145	150.502	167.869	77.9703	81.8726	117.326	117.383	123.01	117.41	81.3564	196.466	241.123	212.422	209.857	217.59	173.228	151.995	146.689	93.2203	98.4202	110.86	149.113
X547	Octadecanedioic acid	14998.8	15690.1	16462.4	15130.2	6208.96	6979.04	4086.61	6603.52	9422.06	6458.35	7897.53	9791.43	3912.25	4011.82	5625.4	5691.36	5162.49	4273.49	11470.1	11778.8	10076.8	10191.7	10777.1	8626.03	4986.07	3763.84	4304.86	4371.38	4372.56	4552.69	5241.06	8128.97	8620.04	5268.37	4575.08	5909.27	14345.4	15080.1	14696.5	15145.4	12017.2	6439.24	12847.4	10160.5	8039.21	10221.4	14035.1	3311.98
X548	Propionic acid	282.955	260.272	238.79	386.788	395.634	377.328	369.971	491.886	233.551	477.966	388.056	428.138	137.325	199.589	174.976	182.075	167.069	213.532	386.559	544.136	368.918	402.78	394.467	371.381	266.693	322.36	371.608	238.752	214.645	383.86	418.179	690.658	577.271	439.011	377.391	154.563	257.455	272.176	271.961	265.948	251.236	12.089	123.119	128.058	285.846	282.133	276.245	165.993
X549	Pyridine	18.8952	49.8188	10.0081	6.59651	36.4441	61.2853	47.8785	40.0035	46.6292	28.6977	44.1755	20.6757	17.0034	35.7627	27.7299	38.054	40.4936	18.4948	92.0661	86.5172	107.895	251.331	122.917	91.9612	206.688	244.908	111.754	124.364	57.5611	36.8946	40.9613	125.675	159.556	42.4018	22.1905	376.931	191.336	178.829	123.327	171.883	120.355	329.324	93.6124	122.093	102.406	233.392	146.066	125.609
X550	Taurodeoxycholic acid	19121	10969.3	13349.5	19207.3	13877.1	12297.3	2382.78	7735.9	13474.9	6163.88	8896.94	11349.8	6358.02	6369.97	6514.94	7221.91	7181.63	7683.67	11230	3883.2	29489.5	39471.6	71532.7	59924.8	4184.09	3859.87	5379.07	4776.39	6264.34	2406	3094.12	12254.2	12737.9	3865.02	3535.68	8867.28	26429.6	25620	24737.5	23943.8	25261.6	4502.51	6916.09	5762.84	11939.7	13226.3	16500.5	6693.82
X551	Vanillylmandelic acid	52.7607	46.7747	21.9192	15.0921	61.848	64.5464	11.1083	12.7494	38.0161	50.2919	32.8484	10.8903	4.76736	2.03254	9.42197	9.92337	20.0004	56.6165	129.955	125.043	88.1862	156.503	115.716	99.3148	71.5745	59.2795	57.8101	63.2242	53.9456	60.0247	47.2125	159.069	127.536	64.7038	46.6062	67.4275	127.346	85.9638	118.25	119.817	115.252	91.8884	23.0612	38.4599	36.0095	84.2464	95.7663	44.4284
X552	D-Xylulose	6759.07	6748.13	6731.3	6291.71	6145.44	6229.91	5589.41	6325.32	6686.45	6331.44	6232.23	6607.54	6364.37	6220.11	6181.32	6600.85	6397.54	6283.53	5330.14	5152.12	5335.33	4925.4	5312.93	5571.49	5712.93	5288.46	5155.18	5205.46	5258.53	5692.19	5834.8	4876.74	5112.16	5659.88	6019.81	5971.97	5609.25	5532.92	5612.12	5769.98	5657.14	1510.87	5422.43	5631.09	5630.41	5481.95	5805.7	5706.72
X553	Galactaric acid	295.635	306.286	217.502	647.475	492.756	479.991	280.045	465.344	300.686	286.361	212.881	298.842	143.692	188.688	144.853	100.969	111.924	268.687	601.595	566.182	617.924	851.034	526.302	342.323	371.483	727.147	954.672	412.713	337.529	207.298	201.601	819.782	675.264	301.511	213.907	173.71	765.582	1186.57	1009.63	973.105	978.068	1149.71	671.307	567.245	750.103	648.796	734.807	610.717
X554	Isovaleric acid	160.335	201.865	147.125	207.293	189.038	173.238	283.965	286.157	190.878	264.388	225.625	281.276	211.212	233.697	221.813	233.506	277.031	292.067	273.655	278.392	249.953	228.319	274.427	252.752	247.656	275.477	290.795	244.323	258.332	226.438	253.405	240.221	241.956	310.698	309.43	290.808	357.683	333.797	330.257	334.856	326.551	328.8	330.531	304.114	316.188	358.083	357.231	305.839
X555	L-3-Phenyllactic acid	228.912	345.622	249.249	915.193	1013.74	1017.08	0	7.08246	6.89562	27.2797	15.3936	32.8728	2.11348	16.6932	18.8287	0	14.7271	32.9113	197.144	357.636	19.2292	25.4866	19.1291	20.9565	8.33879	14.8429	28.8328	41.293	20.0821	124.597	129.437	126.093	121.168	103.043	100.437	7.64739	29.5101	32.0265	40.7154	16.952	32.8223	2.55823	3.13064	0	24.3583	4.82915	7.36757	7.93873
X556	Methyloxovaleric acid	21598.1	29620.6	16720.9	24525.6	25159.1	23954	12654.8	27940	23272.7	24064	23581.9	22127.6	27406.5	26615	24188.2	20299.4	21778.4	18543.6	26028.6	18174.3	21564.5	27089.9	28861.9	22555.9	30951.1	34584.2	34146.4	39676.8	38760	29098	29432.6	27733.6	30373.4	29092.4	26817.6	18429.1	28877	28471.5	28215.5	30555	28052.7	45695	45504.8	37288.7	29364.9	31400.1	33710.3	33028.2
X557	PROSTAGLANDIN A1	11670.7	7876.63	13711.7	10111.8	4273.98	4895.07	3131.89	5052.35	8163.62	4935.12	6365.41	7103.14	5529.66	4920.3	6179.55	8223.31	7101.5	6593.23	5427.64	5767.12	5001.43	5261.42	4052.74	3523.55	3769.8	3733.35	4601.25	4062.07	4564.55	1834.21	1852.65	3509.19	4575.09	2972.82	2844.6	4523.48	8207.41	8151.26	7346.08	7528.72	7355.08	4366.89	6005.4	5186.03	4400.95	4922.26	6478.49	4661.75
X558	HYDROXYPYRUVIC ACID	125.317	386.537	1024.25	106.827	146.501	119.084	96.8936	366.887	253.924	275.366	70.665	187.06	52.9319	50.4981	68.0296	63.0573	102.477	84.6696	122.596	157.772	122.744	85.7922	142.161	72.4723	44.177	39.8503	26.4706	104.82	86.8797	152.243	162.956	163.224	620.614	140.621	66.16	1227.4	365.431	93.4337	477.481	168.881	113.887	279.954	1075.59	882.536	151.136	215.302	72.4147	106.057
X559	2-DEOXYINOSINE	268.63	170.538	70.7305	127.463	189.214	231.87	178.737	170.93	99.1415	152.622	200.965	157.659	129.121	187.297	126.464	188.945	113.316	196.138	48.9748	92.6758	120.435	156.634	109.779	196.667	85.725	25.5875	48.2567	59.8323	56.5091	38.0697	55.9396	54.8577	85.9928	29.4243	10.7335	78.4672	40.0805	102.04	22.0138	57.4775	78.3928	261.405	49.4863	0	34.4648	21.2476	12.5285	17.4574
X560	2-DEOXYRIBOSE-5-PHOSPHATE	170.04	274.991	129.19	249.109	538.532	332.468	506.826	519.077	175.955	457.659	290.67	294.034	324.82	329.859	383.215	265.382	303.594	312.659	409.506	334.521	521.388	436.412	371.983	385.627	270.931	330.08	415.426	423.392	462.47	295.972	297.135	236.737	270.169	271.832	200.226	313.16	208.036	178.41	133.451	148.434	173.271	315.171	251.725	165.416	191.047	179.24	82.1147	267.788
X561	5-METHOXYTRYPTOPHOL	187.574	144.312	102.423	198.869	150.776	188.033	60.442	90.0047	65.506	74.0441	54.0172	86.3221	71.7893	56.2239	74.5948	85.8408	96.499	78.1762	106.569	102.959	61.4903	112.082	93.5267	83.4922	63.6018	66.3057	58.3876	59.7409	74.0769	59.8383	47.9232	25.7875	72.5558	33.9211	39.546	52.333	148.561	154.958	129.491	125.612	98.9418	62.3519	64.3767	82.9883	180.62	102.095	155.358	75.5764
X562	FUMMARATE	410.93	226.285	284.102	118.637	55.8542	69.5863	16.1836	18.2848	164.29	28.7933	65.5345	75.4676	63.1501	50.7723	58.5084	90.5887	65.0577	80.347	231.368	119.517	211.313	208.889	182.227	223.698	268.705	299.156	209.644	0	18.8163	69.1391	67.3959	136.215	180.746	75.7054	96.4497	126.454	312.848	302.217	304.91	319.542	274.109	93.6188	97.0246	151.567	187.808	197.814	230.12	150.15
X563	ISOLEUCINE	22094.1	23463.1	27104.2	30641.9	27207.6	26059	6228.67	10537.4	8153.29	9294.76	8629.63	8842.23	5652.18	6172.59	5822.61	7427.13	8269.06	8008.73	24515	40111.3	14530.2	18821.4	13318.4	11384.5	8014.75	9912.63	13025.9	10182.1	9127.44	5997.31	5837.26	10329.5	9876.91	7571.11	7424.87	9254.43	14581.5	15835.2	15262.8	14223.5	14747.3	9121.32	8980.98	9303.28	10570.2	11384.5	12001.8	9180.58
X564	INOSITOL	31716.6	38810.5	30441.5	38966.7	56794	54849.3	49800.5	46823.8	22432.2	50226.5	35777.4	27786.1	34288	37559.3	43467.1	30201.9	32816.6	33706.8	39493	41266.5	44745.9	40463.1	42088.6	40830.7	26425	27718.8	32872.6	40942.4	38157.3	21948.7	24848	23509.5	27935.9	26359.8	18582.3	28262.7	22987.8	20005.4	17768.5	19564.6	20291.1	19183.5	16287.7	13668.2	11106.2	14013.9	11617.5	18954.2
X565	FUCOSE	83182.6	45173.6	79760	61438.9	65548.1	61266.7	41735.9	54159.7	28288.9	45130.7	46933.3	47801.4	31603.4	33250.8	32492.4	32407.1	36925.8	32708.9	50394.5	65711.2	74371.5	84143.8	51915.2	42559.4	38183.8	44539.7	50289.1	43837.5	39264.8	27114.1	29376.1	38844.5	38421	29348.3	27012.7	29052.1	94022.7	105976	102762	95399.3	98729.3	27821.9	40240.4	39945.5	43144.8	47736.5	49882.1	40698.8
X566	CYTOSINE	4567.21	3411.85	3939.72	5012.99	4410.83	4294.23	4250.8	5132.1	2869.38	4275.46	3096.59	3538.06	3291.24	3419.73	2904.05	2896.27	3289.27	2843.66	5933.58	5017.56	6364.92	8100.01	5204.62	3948.69	2908.06	4268.22	4690.59	4625.34	3912.74	3521.37	3173.13	5855.23	5821.04	4253.62	3304.49	1994.19	5675.23	6937.73	5963.92	5538.62	5562.29	2456.24	4903.95	4526.49	4088.74	3092.72	3330.26	3982.91
X567	L-METHIONE	47280.3	41370.6	47702.2	58328.8	44444.4	42578.8	58181.4	50239.1	49727.5	43024.1	43067	44641.9	45523.4	48893.9	44312.1	46549.7	50255.9	47540.2	51783.7	59202.9	52384.9	68638.5	59921.5	50018.5	37902.4	45034	52504.3	61331.2	56385.1	51614.3	49660.7	55601.6	54197.1	52256.4	50955.3	32678.8	51636	55901.4	54229.6	50787.9	51200.2	45629.6	45223.1	47110.8	39403.3	42752.7	48825.4	41202.3
X568	PALMITATE	716526	941630	850903	711985	427514	380622	671682	881879	1.19428e+06	751795	1.01717e+06	866697	658139	517762	799658	782529	709794	504359	632277	655357	449039	360235	331593	346144	458496	400078	355207	461444	368661	463890	585088	708887	782149	553154	493068	578651	1.29621e+06	1.46019e+06	694557	1.33231e+06	1.01093e+06	927194	1.43846e+06	560689	647561	972053	897160	442477
X569	2-DEOXY-ADENOSINE	20.6017	245.788	108.832	190.198	139.47	143.246	482.229	381.564	23.0221	290.295	313.668	140.831	213.09	281.032	222.095	262.123	399.445	390.328	481.552	910.872	333.243	482.558	97.0318	84.3141	189.316	167.997	176.754	167.252	169.056	557.372	508.659	329.739	364.198	424.349	407.594	103.519	78.5173	172.713	91.5452	135.397	83.7673	110.867	35.5164	5.82509	82.9999	53.8124	18.71	171.276
X570	N-ACETYL GLUCOSAMINE PHOSPHATE	1104.05	859.129	376.081	642.434	625.837	571.381	723.353	1147.96	527.228	971.858	731.95	1042.07	625.41	756.053	676.957	932.586	977	1218.96	1084.32	764.431	932.934	886.881	1298.21	891.373	758.346	894.488	1290.57	1065	1119.09	505.023	551.189	800.044	701.581	935.798	851.664	438.349	617.438	730.365	644.836	636.827	764.744	402.519	501.563	561.625	812.114	850.007	1072.3	570.104
X571	PGE2	3327.22	3073.09	3368.82	3866.56	1473.67	1252.28	1347.15	2442.18	3366.97	2170.16	2225.75	3369.18	4500.77	4307.77	4443.43	2879.05	2503.91	3008.6	2428.03	2045.14	1762.85	1635.18	2113.12	1737	1513.72	1387.18	1452.09	2245.72	2628.18	1564.58	1581.22	2884.27	2758.27	1940.25	1479.44	1505.07	2662.18	2820.25	2285.01	2902.35	2617.59	2061.71	2618.86	2156.12	1760.34	2552.33	2448.57	4856.5
X572	XANTHURINIC ACID	142.292	128.176	174.114	178.94	229.61	221.416	255.231	184.7	139.846	156.341	158.745	187.344	166.092	185.85	134.45	152.009	155.957	158.705	228.675	225.784	255.93	316.673	359.181	304.589	109.653	143.629	192.129	292.113	269.95	242.407	254.857	178.548	200.603	190.655	143.081	64.1574	367.558	453.186	359.112	384.098	361.444	206.1	127.026	82.7618	127.925	119.568	118.675	174.223
X573	ACONITATE	399.342	496.365	505.562	522.117	367.103	394.82	317.622	328.693	392.962	408.706	473.784	393.493	510.867	546.281	449.092	519.995	456.908	515.834	414.056	451.182	410.144	397.942	418.833	550.79	558.813	480.276	412.403	455.172	496.072	723.529	777.202	468.067	467.31	571.901	590.869	424.305	248.598	380.177	212.267	213.582	110.914	311.886	365.973	359.561	329.128	354.414	314.155	393.702
X574	GLYCEROL -PHOSPHATE	433.418	273.294	131.524	187.373	169.363	166.851	66.5425	168.241	159.213	165.494	101.381	190.019	86.857	96.92	90.0052	70.5372	72.8368	93.9554	267.925	139.732	150.968	162.983	190.971	144.008	154.467	199.415	273.543	100.865	88.6745	28.6114	49.3472	166.638	162.188	95.3705	70.2622	299.842	322.36	320.426	340.14	331.388	388.228	322.022	294.569	301.394	494.03	526.01	621.506	370.701
X575	ALPHA-KETOGLUTARATE	423.709	409.782	324.177	418.792	538.424	564.437	606.314	542.534	438.695	479.324	439.208	353.354	512.225	565.837	447.821	332.745	319.731	431.896	522.922	559.861	515.745	616.679	574.719	405	361.148	432.611	474.428	580.133	531.434	608.034	576.776	886.351	751.997	560.616	610.742	466.365	681.108	618.784	856.852	692.476	614.796	1074.05	951.873	1007.94	701.501	1020.47	1162.7	692.564
X576	GLUCOSE -6-PHOSPHATE	723.613	639.833	206.135	907.375	533.165	488.865	517.99	618.286	350.418	587.969	264.666	552.95	342.193	373.786	289.217	462.769	488.466	626.258	856.465	543.251	681.377	667.788	1004.24	582.145	634.338	752.449	1027.4	486.63	515.985	239.353	201.698	898.793	728.44	472.373	320.51	519.474	293.206	418.513	346.951	391.953	472.799	114.589	127.095	94.1274	1112.86	1233	2295.39	415.771
X577	Xylitol	6404.11	5268.83	5895.94	6297.81	7328.13	7179.43	3952.42	3915.37	3831.01	3484.06	3362.63	4062.66	2821.27	2959.25	2811.84	2881.94	3024.05	2911.63	4197.53	4929.75	3921.91	4780.79	5013.44	4206.99	2923.76	3478.73	3909.84	2718.95	2563.73	3025.02	3017.61	3202.24	3226.88	2872.12	2977.71	6614.42	8347	8396.29	8192.98	8103.19	7945.48	5291.27	6249.22	6174.68	4521.23	5089.03	6169.48	4380.1
[truncated: 22 more columns]
